# Supplementary material for: Lipopolysaccharide and statin-mediated immune-responsive protein networks revealed in macrophages through affinity purification spacer-arm controlled cross-linking (AP-SPACC) proteomics
Source: Royal Society of Chemistry journal article supplement (doi:10.1039/d2mo00224h), 2022-10-18
Supplement: d2mo00224h1.pdf [file d2mo00224h1.pdf]

## Lipopolysaccharide and Statin Mediated Immune-responsive Protein Networks in Macrophage Revealed Through Affinity Purification Spacer-Arm Controlled Cross-linking (AP-SPACC) Proteomics

Abu Hena Mostafa Kamal<sup>1,2</sup>, Jayanta K. Chakrabarty<sup>1,3</sup>, Saiful M. Chowdhury<sup>1\*</sup>

<sup>1</sup>Department of Chemistry and Biochemistry, University of Texas at Arlington, TX 76019

<sup>2</sup>*Present Address:* Dan L Duncan Comprehensive Cancer Center, Advanced Technology Core, Baylor College of Medicine, Houston TX 77030

<sup>3</sup>*Present Address:* Quantitative Proteomics and Metabolomics Center, Columbia University, New York, NY 10027

### Supplementary Information

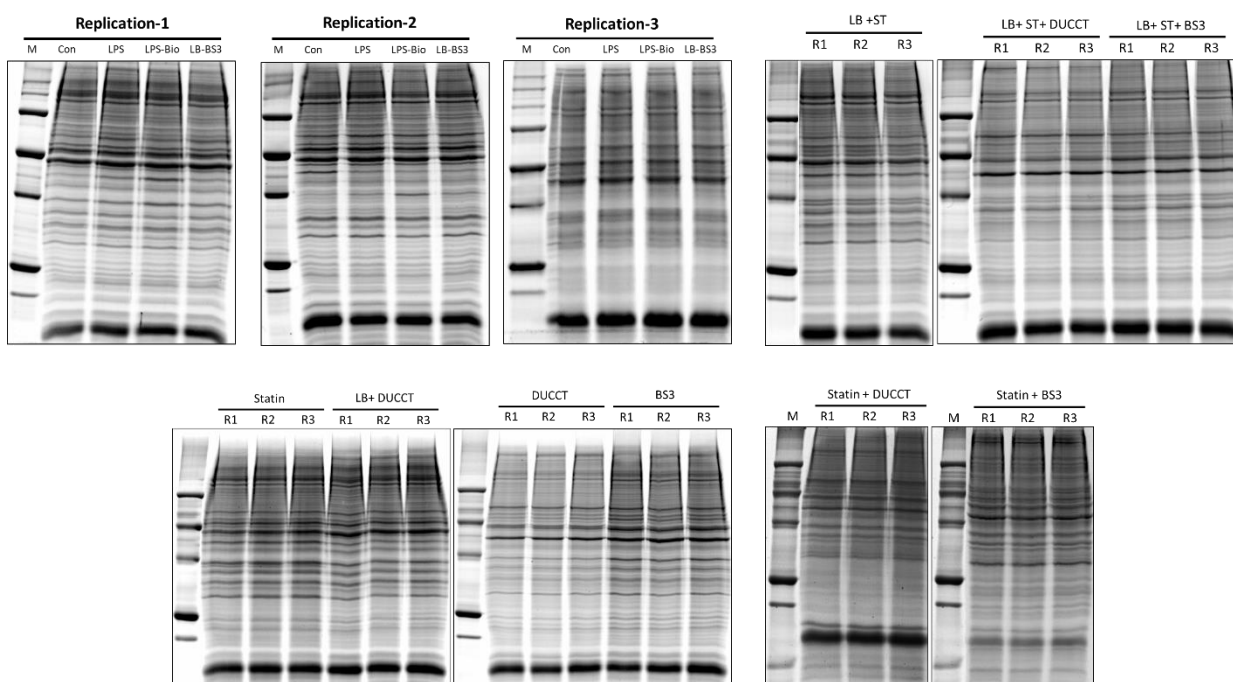

**Figure S1** Representative SDS-PAGE gels with the treatment of bio-LPS, statin-bio-LPS, and statin along with cross-linkers in Raw 264.7 macrophage cells.

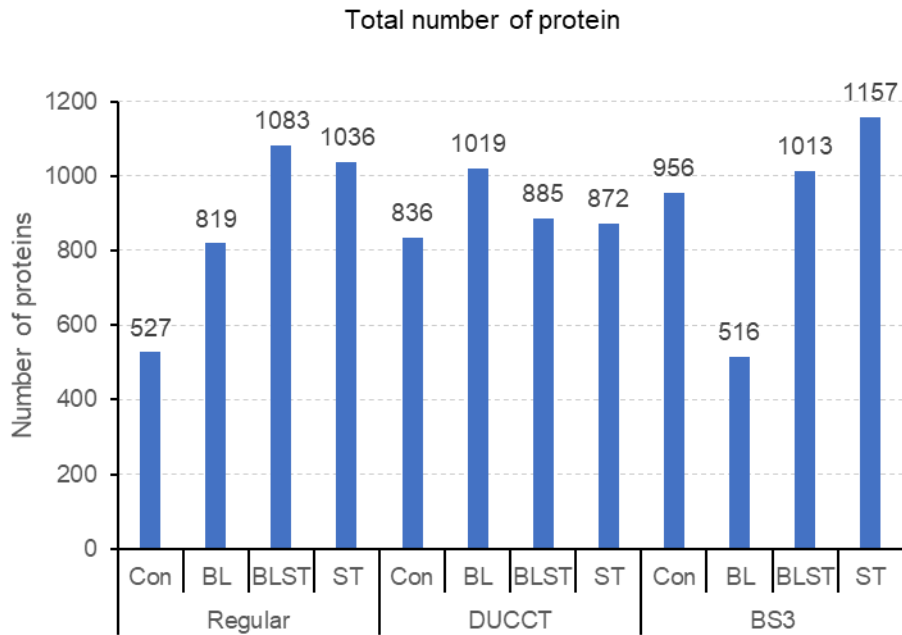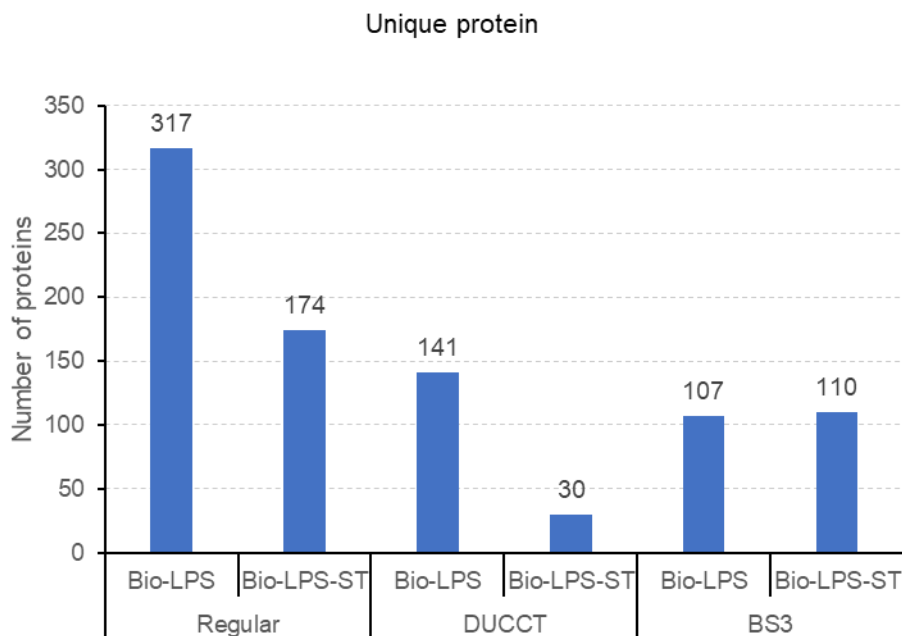

**Figure S2** Distribution of identified proteins in RAW 264.7 macrophages during the treatment of bio-LPS, statin-bio-LPS, and statin along with cross-linkers using gel-based affinity proteomics coupled to mass spectrometry.
