# Supplementary material for: Lipopolysaccharide and statin-mediated immune-responsive protein networks revealed in macrophages through affinity purification spacer-arm controlled cross-linking (AP-SPACC) proteomics
Source: Royal Society of Chemistry journal article supplement (doi:10.1039/d2mo00224h), 2022-10-18
Supplement: d2mo00224h2.pdf [file d2mo00224h2.pdf]

**Table S1:** List of primer sequences used for qRT-PCR

| <b>Gene Name</b> | <b>Sequences</b>                |
|------------------|---------------------------------|
| SART3F           | 5''-AACACTGTCGGAAGGCTCTGCA-3''  |
| SART3R           | 5''-CCGTTTTCTGAATGGCTAGATCC-3'' |
| Sfxn1F           | 5''-AAGCCATCACGCAGGTGGTCAT-3''  |
| Sfxn1R           | 5''-ACGTGACTTGGATTGGCGCACT-3''  |
| Rab35F           | 5''-GGTGGTAGAGACAGAAGATGCC-3''  |
| Rab35R           | 5''-TCTTTGCTCGCAGAACCAGCTC-3''  |
| Acp6F            | 5''-GATGAGGCAAGCTCTGAAGTCC-3''  |
| Acp6R            | 5''-TCTGAGATGCCTGGCTGCGAAA-3''  |
| Sgpl1F           | 5''-GGAAAGCCTCAGGAGCTGTGTA-3''  |
| Sgpl1R           | 5''-CTGCCTCTAACTTCCGCAATCC-3''  |
| Tpd52F           | 5''-TGACGGAAGAGGAGCAAGAGGA-3''  |
| Tpd52R           | 5''-GCCGAGATGCTTCTCTTTTGCGG-3'' |
