# Supplementary material for: Lipopolysaccharide and statin-mediated immune-responsive protein networks revealed in macrophages through affinity purification spacer-arm controlled cross-linking (AP-SPACC) proteomics
Source: Royal Society of Chemistry journal article supplement (doi:10.1039/d2mo00224h), 2022-10-18
Supplement: d2mo00224h3.pdf [file d2mo00224h3.pdf]

**Table S2** List of identified proteins with replicate data of all samples in RAW 264.7 macrophages during the treatment of bio-LPS, statin-bio-LPS, and statin along with cross-linkers. The PSMs were normalized by percentage.

| Accession  | Description                                               | Control | Bio-LPS | Statin-Bio-LP | Statin | DUCCT | Bio-LPS-DUCCT | Bio-LPS-Statin-DUCCT | Statin-DUCCT | BS3  | Bio-LPS-BS3 | Bio-LPS-Statin-BS3 | Statin-BS3 |
|------------|-----------------------------------------------------------|---------|---------|---------------|--------|-------|---------------|----------------------|--------------|------|-------------|--------------------|------------|
| A0A023T778 | Mago nashi protein                                        |         |         |               |        |       |               |                      |              |      |             |                    | 0.02       |
| A0A068BEQ2 | H2-K region expressed gene 6, isoform CRA_a               |         | 0.03    | 0.03          | 0.02   | 0.03  |               | 0.02                 |              | 0.05 |             | 0.03               |            |
| A0A068BFR3 | RAS oncogene family protein                               | 0.09    | 0.06    | 0.13          | 0.13   | 0.23  | 0.11          | 0.15                 | 0.09         | 0.21 | 0.09        | 0.19               | 0.18       |
| A0A068BFS0 | WD repeat domain 46                                       |         | 0.03    |               | 0.01   |       |               |                      |              |      |             |                    |            |
| A0A075DC90 | Cytochrome c oxidase subunit 2                            | 0.12    | 0.10    | 0.11          | 0.11   | 0.16  | 0.08          | 0.04                 | 0.07         | 0.12 | 0.10        | 0.08               | 0.13       |
| A0A077S2U6 | Lysozyme C-2                                              |         |         |               |        |       |               |                      | 0.03         |      |             |                    | 0.02       |
| A0A077S9N1 | Lysozyme C-1                                              |         |         | 0.02          | 0.04   |       | 0.03          | 0.02                 | 0.07         | 0.02 |             | 0.03               | 0.06       |
| A0A087WQ39 | IQ motif and SEC7 domain-containing protein 1             |         |         |               |        |       | 0.01          |                      |              |      |             |                    | 0.01       |
| A0A087WQS2 | Basic leucine zipper and W2 domain-containing protein 1   |         |         | 0.05          | 0.02   | 0.02  | 0.02          | 0.02                 |              | 0.04 |             | 0.03               |            |
| A0A087WSP5 | Signal transducer and activator of transcription          |         |         |               |        |       | 0.02          |                      |              |      |             |                    |            |
| A0A0A0MQA5 | Tubulin alpha-4A chain                                    | 0.75    | 0.57    | 0.40          | 0.45   | 0.28  | 0.30          | 0.14                 | 0.13         | 0.42 | 0.56        | 0.27               | 0.59       |
| A0A0A0MQF6 | Glyceraldehyde-3-phosphate dehydrogenase                  | 0.93    | 1.01    | 0.52          | 1.14   | 0.92  | 0.59          | 0.36                 | 0.79         | 0.91 | 0.82        | 0.67               | 1.22       |
| A0A0A0MQN4 | Ubiquitin-like modifier-activating enzyme ATG7            |         |         | 0.06          | 0.04   | 0.02  | 0.02          | 0.03                 |              | 0.04 |             | 0.04               | 0.02       |
| A0A0A6VVS2 | Transmembrane and coiled-coil domain-containing protein 1 |         |         | 0.04          | 0.06   | 0.04  | 0.02          | 0.02                 | 0.05         |      |             | 0.03               | 0.06       |
| A0A0A6YVU8 | MCG119397                                                 | 0.05    | 0.03    | 0.01          | 0.01   |       | 0.01          |                      |              |      |             |                    |            |
| A0A0N4SVL0 | Eukaryotic translation initiation factor 4 gamma 3        |         | 0.04    | 0.02          |        |       | 0.01          |                      |              |      | 0.07        |                    |            |
| A0JNY7     | Eukaryotic translation initiation factor 4, gamma 2       |         | 0.07    | 0.04          | 0.02   | 0.02  | 0.03          |                      |              | 0.03 | 0.10        | 0.02               |            |
| A1A4A7     | Pgam5 protein                                             |         |         |               |        |       | 0.01          |                      |              |      |             |                    |            |
| A1A4T2     | Alpha glucosidase 2 alpha neutral subunit                 |         |         |               |        | 0.02  |               | 0.04                 | 0.07         |      |             | 0.03               | 0.11       |
| A1L2Z3     | C230096C10Rik protein                                     |         | 0.07    | 0.09          | 0.09   | 0.05  | 0.03          | 0.04                 | 0.04         | 0.07 | 0.08        | 0.07               | 0.04       |
| A1L3C2     | Polr1c protein                                            |         |         | 0.02          |        |       |               |                      |              | 0.01 |             | 0.02               |            |
| A2A432     | Cullin-4B                                                 |         | 0.03    |               |        |       |               |                      |              | 0.01 | 0.08        |                    |            |
| A2A4J8     | Vacuolar protein-sorting-associated protein 25            |         |         |               | 0.01   |       |               |                      |              |      |             |                    | 0.02       |
| A2A4P4     | Protein Gm27029                                           |         | 0.04    |               |        |       | 0.02          |                      |              | 0.02 |             |                    |            |
| A2A7S7     | Tyrosine--tRNA ligase                                     | 0.16    | 0.19    | 0.15          | 0.08   | 0.06  | 0.12          | 0.08                 | 0.03         | 0.15 | 0.22        | 0.11               | 0.02       |
| A2ADH1     | Magnesium transporter protein 1                           |         |         | 0.02          | 0.01   |       | 0.01          |                      | 0.01         |      |             | 0.02               | 0.01       |
| A2AE27     | AMP deaminase 2                                           |         |         |               |        |       |               | 0.01                 |              |      |             | 0.02               |            |
| A2AFP5     | Ras-related protein Rab-9A                                |         |         |               |        |       |               |                      |              |      |             |                    | 0.02       |
| A2AFQ0     | E3 ubiquitin-protein ligase HUWE1                         |         | 0.06    | 0.02          | 0.03   |       | 0.02          |                      |              | 0.05 | 0.05        | 0.04               | 0.01       |
| A2AGT5     | Cytoskeleton-associated protein 5                         |         |         | 0.02          | 0.01   |       | 0.01          | 0.02                 |              | 0.03 | 0.09        | 0.03               | 0.01       |
| A2AL50     | Alkylidihydroxyacetonephosphate synthase, peroxisomal     | 0.07    | 0.07    | 0.10          | 0.10   | 0.04  | 0.06          | 0.03                 | 0.03         | 0.05 |             | 0.08               | 0.01       |
| A2AMU9     | Mrto4 protein                                             |         | 0.04    | 0.02          | 0.01   | 0.04  |               | 0.01                 | 0.02         | 0.03 |             |                    | 0.02       |
| A2AP31     | MCG9810                                                   |         |         |               |        |       |               |                      |              |      |             |                    | 0.01       |
| A2APM2     | CD44 antigen                                              |         |         | 0.04          | 0.04   |       |               | 0.03                 | 0.06         |      |             | 0.06               |            |
| A2ASS6     | Titin                                                     |         |         |               |        |       |               |                      | 0.01         |      |             |                    | 0.01       |
| A2AWP8     | Rho guanine nucleotide exchange factor 10-like protein    |         |         | 0.02          |        |       |               |                      |              | 0.01 |             |                    | 0.01       |
| A2BE28     | Ribosomal biogenesis protein LAS1L                        |         | 0.03    |               |        |       |               |                      |              |      |             |                    |            |
| A2CG35     | Ras-related protein Rab-12                                | 0.04    |         | 0.03          |        | 0.04  | 0.01          | 0.03                 | 0.03         | 0.03 |             | 0.03               | 0.02       |
| A2RRJ4     | Exportin 5                                                |         | 0.07    |               |        |       | 0.01          |                      |              | 0.02 | 0.08        |                    |            |
| A2RS96     | Transmembrane emp24 domain-containing protein 5           |         |         | 0.04          | 0.05   | 0.02  | 0.02          | 0.04                 | 0.01         | 0.01 |             | 0.04               | 0.01       |
| A2RSV8     | Cytochrome c oxidase subunit 4 isoform 1, mitochondrial   |         |         |               | 0.07   |       | 0.04          | 0.04                 | 0.05         |      |             | 0.07               | 0.05       |
| A3KG93     | Lysine-specific histone demethylase 1A                    |         |         |               |        |       |               |                      |              | 0.01 |             |                    |            |

|        |                                                                           |      |      |      |      |      |      |      |      |      |      |      |      |
|--------|---------------------------------------------------------------------------|------|------|------|------|------|------|------|------|------|------|------|------|
| A4FVC9 | Ahr protein                                                               |      |      |      |      |      |      |      |      | 0.01 |      |      | 0.03 |
| A6ZI44 | Fructose-bisphosphate aldolase                                            | 0.18 | 0.15 | 0.06 | 0.08 | 0.06 | 0.05 | 0.04 | 0.04 | 0.06 | 0.11 | 0.05 | 0.04 |
| A8C1T7 | Cysteine-rich with EGF-like domain protein 1                              |      |      | 0.02 | 0.02 |      |      | 0.02 |      |      |      | 0.03 |      |
| A8C756 | Thyroid adenoma-associated protein homolog                                |      |      |      |      |      |      |      |      | 0.01 |      |      | 0.02 |
| A8DUK2 | Beta-globin                                                               |      |      |      |      | 0.35 |      |      | 0.01 | 0.03 |      |      |      |
| A8IP69 | 14-3-3 protein gamma                                                      |      |      | 0.07 | 0.05 | 0.14 | 0.03 | 0.13 | 0.16 | 0.10 |      | 0.12 | 0.19 |
| B0QZN5 | Vesicle-associated membrane protein 2                                     |      |      |      |      |      |      |      | 0.02 |      |      |      | 0.01 |
| B1AQF4 | Dual-specificity protein phosphatase 3                                    |      | 0.03 |      | 0.02 |      |      |      |      |      |      |      | 0.03 |
| B1AT82 | MCG6846, isoform CRA_c                                                    |      |      | 0.03 | 0.04 |      | 0.02 | 0.01 |      | 0.04 |      | 0.03 | 0.02 |
| B1ATD2 | Lymphocyte cytosolic protein 2                                            |      |      |      |      |      |      |      |      |      |      |      | 0.02 |
| B1AUN2 | MCG14442                                                                  |      |      | 0.02 |      |      | 0.01 |      |      |      |      |      |      |
| B1AWD9 | Clathrin light chain A                                                    |      |      |      |      | 0.06 |      |      | 0.01 |      |      |      | 0.06 |
| B1AX58 | Plastin-3                                                                 |      |      |      |      |      |      |      |      |      |      |      | 0.01 |
| B1AZI6 | THO complex subunit 2                                                     |      |      |      |      |      |      |      |      | 0.02 |      |      |      |
| B2CY77 | Laminin receptor                                                          | 0.64 | 0.52 | 0.48 | 0.73 | 0.57 | 0.47 | 0.44 | 0.44 | 0.57 | 0.49 | 0.65 | 0.38 |
| B2M0S2 | Clk2-Scamp3 protein                                                       | 0.11 | 0.12 | 0.04 | 0.05 | 0.05 | 0.05 | 0.02 | 0.02 | 0.04 | 0.11 | 0.06 | 0.01 |
| B2RQC6 | CAD protein                                                               | 0.38 | 0.35 | 0.15 | 0.15 | 0.12 | 0.12 | 0.05 | 0.02 | 0.25 | 0.42 | 0.07 | 0.18 |
| B2RRZ7 | TNFRSF1A-associated via death domain                                      |      |      |      |      |      |      |      |      |      |      |      | 0.01 |
| B2RSR7 | Glycerol-3-phosphate dehydrogenase [NAD(+)]                               | 0.11 | 0.09 | 0.04 | 0.04 |      | 0.06 | 0.02 |      | 0.06 | 0.06 | 0.03 | 0.01 |
| B2RSV4 | Splicing factor 3b, subunit 3                                             | 0.35 | 0.23 | 0.14 | 0.16 | 0.20 | 0.12 | 0.10 | 0.07 | 0.25 | 0.45 | 0.16 | 0.05 |
| B2RTK3 | Histone H2B                                                               |      | 0.11 | 0.16 | 0.42 | 0.22 | 0.15 | 0.20 | 0.40 | 0.08 | 0.16 | 0.26 | 0.46 |
| B2RTM0 | Histone H4                                                                |      |      |      |      | 0.03 |      | 0.02 | 0.46 | 0.02 |      | 0.03 | 0.57 |
| B2RTP7 | Krt2 protein                                                              | 0.42 | 0.24 | 0.67 | 0.49 | 0.39 | 0.35 | 0.29 | 0.35 | 0.34 | 0.37 | 0.48 | 0.27 |
| B2RUC7 | Serine-threonine kinase receptor-associated protein                       |      | 0.03 |      |      |      |      |      |      |      |      |      |      |
| B2RUR3 | ATP-binding cassette, sub-family B (MDR/TAP), member 1B                   | 0.06 | 0.04 | 0.03 | 0.02 | 0.02 | 0.01 |      |      | 0.02 | 0.06 | 0.02 |      |
| B2RVP5 | Histone H2A                                                               |      |      | 0.05 | 0.16 | 0.11 | 0.07 | 0.16 | 0.23 | 0.01 |      | 0.15 | 0.18 |
| B2RWW1 | Microtubule-associated protein 15                                         |      |      | 0.02 |      |      |      |      |      |      |      |      |      |
| B2RXQ5 | Phosphatidylinositol-3,4, 5-trisphosphate-dependent Rac exchange factor 1 |      |      |      |      |      |      |      |      |      | 0.05 |      |      |
| B2RXR1 | Coiled-coil domain containing 88B                                         |      | 0.05 | 0.05 |      |      |      | 0.03 |      |      | 0.11 | 0.05 |      |
| B2RXS4 | Plexin-B2                                                                 | 0.05 | 0.04 | 0.06 | 0.06 |      | 0.01 | 0.04 | 0.03 | 0.01 | 0.06 | 0.06 | 0.03 |
| B2RXY7 | Carbonyl reductase 1                                                      |      | 0.05 | 0.02 | 0.02 | 0.06 | 0.05 |      |      | 0.05 |      | 0.02 | 0.01 |
| B2RY56 | RNA-binding protein 25                                                    |      |      |      |      |      |      |      |      |      |      |      | 0.01 |
| B2RY90 | Isoc2a protein                                                            |      |      | 0.02 | 0.03 |      |      |      |      |      |      |      | 0.02 |
| B3VQI8 | Cytochrome b-245 light chain                                              |      |      | 0.02 | 0.03 | 0.03 | 0.02 |      | 0.02 |      |      | 0.02 | 0.02 |
| B6DT57 | p40phox                                                                   | 0.14 | 0.14 | 0.08 | 0.05 | 0.05 | 0.08 | 0.05 |      | 0.14 |      | 0.09 | 0.01 |
| B7STB7 | Annexin                                                                   |      | 0.06 | 0.14 | 0.07 | 0.09 | 0.03 | 0.11 | 0.05 | 0.15 |      | 0.16 | 0.11 |
| B7ZNK9 | Spata5 protein                                                            |      |      |      |      | 0.02 |      | 0.01 | 0.01 | 0.01 |      | 0.02 |      |
| B7ZWC0 | N-myc downstream regulated gene 1                                         |      | 0.05 | 0.07 | 0.04 |      |      | 0.05 | 0.10 |      |      | 0.06 | 0.08 |
| B7ZWC4 | Insulin-like growth factor 2 receptor                                     |      |      | 0.06 | 0.03 |      | 0.01 | 0.05 | 0.01 | 0.04 |      | 0.06 |      |
| B9EHN0 | Ubiquitin-activating enzyme E1, Chr X                                     |      | 0.04 | 0.06 | 0.03 | 0.08 | 0.01 | 0.08 | 0.05 | 0.11 | 0.14 | 0.10 | 0.06 |
| B9EIU1 | Glutamyl-prolyl-tRNA synthetase                                           | 0.24 | 0.33 | 0.24 | 0.19 | 0.19 | 0.17 | 0.13 | 0.04 | 0.30 | 0.48 | 0.22 | 0.19 |
| B9EJ86 | Oxysterol-binding protein-related protein 8                               | 0.04 | 0.05 | 0.05 | 0.03 | 0.04 | 0.03 | 0.02 | 0.01 | 0.05 | 0.10 | 0.04 | 0.02 |
| B9EK95 | Myof protein                                                              |      |      | 0.34 | 0.11 | 0.10 | 0.06 | 0.26 | 0.10 | 0.16 | 0.27 | 0.34 | 0.03 |
| B9EKP5 | Filamin, alpha                                                            | 0.23 | 0.30 | 0.45 | 0.33 | 0.16 | 0.14 | 0.30 | 0.16 | 0.29 | 0.41 | 0.46 | 0.30 |
| C7G3P2 | MKIAA0536 protein                                                         |      |      |      |      |      |      |      |      |      |      |      | 0.01 |
| DOESZ4 | Elastin microfibril interfacer 2                                          |      |      | 0.02 | 0.02 |      |      |      |      |      |      |      |      |
| D1FNM9 | Calcium-transporting ATPase                                               |      | 0.05 |      | 0.02 |      | 0.01 |      | 0.01 |      |      | 0.02 | 0.01 |
| D3YTQ3 | Heterogeneous nuclear ribonucleoprotein D-like                            |      |      | 0.04 | 0.03 | 0.04 | 0.02 | 0.01 | 0.04 | 0.05 |      | 0.03 | 0.03 |
| D3YTS1 | Signal peptidase complex catalytic subunit SEC11                          |      |      | 0.04 | 0.04 | 0.02 | 0.01 | 0.02 | 0.05 |      |      | 0.04 | 0.09 |
| D3YTT4 | Isobutyryl-CoA dehydrogenase, mitochondrial                               |      | 0.06 | 0.04 | 0.04 |      | 0.01 |      |      | 0.03 |      | 0.04 |      |

|        |                                                              |      |      |      |      |      |      |      |      |      |      |      |      |
|--------|--------------------------------------------------------------|------|------|------|------|------|------|------|------|------|------|------|------|
| D3YX87 | Protein misato homolog 1                                     |      |      |      |      |      |      |      |      |      |      |      | 0.01 |
| D3YYI8 | Histone deacetylase                                          |      | 0.04 |      | 0.02 |      | 0.02 |      |      | 0.01 |      |      | 0.02 |
| D3YYT1 | Putative oxidoreductase GLYR1                                |      | 0.03 | 0.02 | 0.02 |      | 0.02 |      |      | 0.02 |      |      |      |
| D3YZZ5 | Protein Tmed7                                                |      |      | 0.02 |      |      |      | 0.02 |      |      |      | 0.02 |      |
| D3Z041 | Long-chain-fatty-acid--CoA ligase 1                          |      |      | 0.03 | 0.01 | 0.02 |      | 0.01 |      |      |      | 0.02 |      |
| D3Z0M9 | MCG18410, isoform CRA_a                                      |      |      |      |      | 0.02 |      |      |      | 0.01 |      |      |      |
| D3Z1N9 | MCG9889                                                      |      |      | 0.05 | 0.03 | 0.05 | 0.04 | 0.02 | 0.02 | 0.04 |      | 0.04 | 0.02 |
| D3Z3G6 | Mitogen-activated protein kinase                             |      |      | 0.02 |      |      |      | 0.01 |      | 0.01 |      | 0.02 |      |
| D3Z3N4 | MCG11326, isoform CRA_a                                      |      |      |      |      |      | 0.01 |      |      |      |      |      |      |
| D3Z4L9 | Tumor necrosis factor alpha-induced protein 2                |      |      | 0.01 |      |      |      |      |      |      |      |      |      |
| D3Z5I1 | Zinc finger CCCH-type antiviral protein 1                    |      |      | 0.02 | 0.01 |      |      |      |      |      |      | 0.02 | 0.02 |
| D3Z780 | Translation initiation factor eIF-2B subunit delta           |      |      |      |      |      | 0.01 |      |      |      |      |      |      |
| D3Z7P0 | BRCA1-A complex subunit BRE                                  |      |      | 0.02 | 0.01 |      | 0.01 |      |      | 0.02 |      | 0.02 | 0.01 |
| D3Z7P3 | Glutaminase kidney isoform, mitochondrial                    |      | 0.08 | 0.06 | 0.04 |      | 0.02 |      |      | 0.02 |      | 0.02 |      |
| D4AFX6 | Centaurin beta 2                                             |      |      |      |      |      |      |      |      |      | 0.05 |      |      |
| D4AFX7 | Protein Dnajc13                                              |      | 0.03 |      | 0.02 |      |      |      |      | 0.02 |      |      | 0.01 |
| D6Q0F5 | Cytoplasmic dynein intermediate chain 2 isoform 2.1          |      |      | 0.01 |      |      |      | 0.02 | 0.02 | 0.01 |      | 0.02 | 0.02 |
| E0CXZ9 | Voltage-gated potassium channel subunit beta-2               |      |      |      |      |      |      |      | 0.01 |      |      |      | 0.01 |
| E0CYV0 | Protein-L-isoaspartate O-methyltransferase                   |      |      | 0.02 | 0.02 |      | 0.01 |      |      |      |      |      |      |
| E5Q371 | Integrin-associated protein                                  |      |      | 0.01 |      |      |      |      |      |      |      |      |      |
| E9PUF7 | Rho guanine nucleotide exchange factor 1                     |      | 0.05 |      |      |      |      |      |      |      |      |      |      |
| E9PUW7 | Exportin-7                                                   |      |      |      |      |      |      |      |      |      |      |      | 0.01 |
| E9PVX6 | Protein Mki67                                                |      | 0.03 |      |      |      |      |      |      |      |      |      |      |
| E9PVY8 | Microtubule-actin cross-linking factor 1                     |      | 0.06 | 0.03 | 0.03 |      |      | 0.01 | 0.01 | 0.01 |      | 0.04 | 0.03 |
| E9PW43 | Protein Gm10320                                              |      |      |      |      |      |      |      | 0.03 |      |      |      | 0.02 |
| E9PW66 | Nucleosome assembly protein 1-like 1                         | 0.05 | 0.04 | 0.02 |      | 0.03 | 0.04 | 0.02 | 0.02 | 0.03 |      | 0.02 |      |
| E9PWG6 | Protein Ncapg                                                | 0.06 | 0.05 | 0.02 | 0.04 | 0.03 | 0.04 |      |      | 0.06 | 0.10 |      | 0.02 |
| E9PY39 | Protein Gm20431                                              | 0.08 | 0.04 | 0.04 | 0.05 | 0.04 | 0.04 | 0.02 | 0.02 |      | 0.04 | 0.03 | 0.06 |
| E9PYH2 | Cytosolic acyl coenzyme A thioester hydrolase                |      |      | 0.03 |      |      |      | 0.02 | 0.01 | 0.03 |      | 0.04 | 0.02 |
| E9PYK0 | Protein unc-93 homolog B1                                    |      |      |      | 0.01 | 0.02 | 0.01 |      | 0.01 | 0.02 |      | 0.02 | 0.01 |
| E9PYL9 | Protein Gm10036                                              | 0.24 | 0.11 | 0.13 | 0.17 | 0.24 | 0.11 | 0.10 | 0.13 |      | 0.15 | 0.15 | 0.18 |
| E9Q035 | Protein Gm20425                                              | 0.12 | 0.12 | 0.07 | 0.09 | 0.05 | 0.05 | 0.05 | 0.04 | 0.04 | 0.12 | 0.10 | 0.03 |
| E9Q0F0 | Protein Krt78                                                | 0.65 | 0.36 | 0.57 | 0.37 | 0.39 | 0.39 | 0.22 | 0.28 | 0.29 | 0.55 | 0.41 | 0.24 |
| E9Q1G8 | Septin-7                                                     |      |      |      |      |      |      |      |      |      |      |      | 0.01 |
| E9Q2M9 | Protein Wdfy4                                                |      |      | 0.01 |      |      |      |      |      |      |      |      | 0.01 |
| E9Q317 | Histone deacetylase complex subunit SAP18                    |      |      |      | 0.02 |      |      |      |      |      |      |      | 0.01 |
| E9Q3G8 | Protein Nup153                                               |      | 0.05 |      |      |      |      |      |      |      | 0.08 |      |      |
| E9Q3X0 | Major vault protein                                          | 0.10 | 0.09 | 0.09 | 0.06 | 0.06 | 0.04 | 0.04 | 0.02 | 0.08 | 0.30 | 0.06 | 0.03 |
| E9Q455 | Tropomyosin alpha-1 chain                                    |      |      |      |      | 0.06 |      |      |      |      | 0.03 |      | 0.01 |
| E9Q481 | Serine/threonine-protein phosphatase 4 regulatory subunit 3A |      |      |      |      |      |      |      |      | 0.01 |      |      | 0.01 |
| E9Q557 | Desmoplakin                                                  | 0.10 | 0.07 | 0.19 | 0.17 |      | 0.06 | 0.04 | 0.02 |      | 0.08 | 0.09 | 0.08 |
| E9Q586 | Dynactin subunit 1                                           |      | 0.04 | 0.03 | 0.05 | 0.02 | 0.03 | 0.02 |      | 0.06 |      | 0.04 | 0.03 |
| E9Q5A0 | 60S ribosomal protein L13a                                   | 0.14 | 0.10 | 0.08 | 0.13 | 0.11 | 0.05 | 0.07 | 0.06 | 0.08 | 0.09 | 0.09 | 0.21 |
| E9Q616 | Protein Ahnak                                                | 0.13 | 0.21 | 0.18 | 0.20 | 0.10 | 0.10 | 0.09 | 0.13 | 0.09 | 0.16 | 0.19 | 0.06 |
| E9Q634 | Unconventional myosin-le                                     | 0.07 |      | 0.03 | 0.05 |      | 0.02 |      | 0.02 | 0.04 |      | 0.02 | 0.06 |
| E9Q7G0 | Protein Numa1                                                |      | 0.13 |      |      |      |      |      |      | 0.01 |      |      | 0.01 |
| E9Q852 | Afadin                                                       |      |      | 0.04 | 0.02 |      | 0.03 |      |      |      | 0.08 | 0.03 |      |
| E9Q912 | Protein Rap1gds1                                             |      |      |      |      |      |      |      |      |      |      |      | 0.02 |
| E9QA22 | Ribosomal protein L15                                        | 0.04 | 0.05 | 0.04 | 0.04 | 0.06 | 0.02 | 0.02 | 0.07 | 0.03 |      | 0.03 | 0.18 |
| E9QB02 | Methionine--tRNA ligase, cytoplasmic                         | 0.16 | 0.14 | 0.06 | 0.10 | 0.05 | 0.06 | 0.02 |      | 0.08 | 0.14 | 0.03 | 0.06 |
| E9QJS7 | Protein Adgre5                                               |      |      | 0.04 | 0.04 |      |      | 0.02 | 0.01 |      |      | 0.03 | 0.02 |

|        |                                                                                  |      |      |      |      |      |      |      |      |      |      |      |      |
|--------|----------------------------------------------------------------------------------|------|------|------|------|------|------|------|------|------|------|------|------|
| E9QK83 | Small subunit processome component 20 homolog                                    |      | 0.06 |      |      |      |      |      |      |      |      |      |      |
| E9QKR0 | Guanine nucleotide-binding protein G(I)/G(S)/G(T) subunit beta-2                 | 0.07 | 0.06 | 0.07 | 0.05 | 0.08 | 0.04 | 0.05 | 0.06 | 0.07 | 0.07 | 0.09 | 0.09 |
| E9QLA5 | Inverted formin-2                                                                |      | 0.04 |      |      |      |      |      |      |      |      |      |      |
| E9QM99 | Dedicator of cytokinesis protein 10                                              |      | 0.04 |      |      |      |      |      |      |      |      |      |      |
| E9QMK9 | Protein 9030617O03Rik                                                            |      |      | 0.02 |      |      |      |      |      |      |      |      |      |
| E9QN31 | Probable 28S rRNA (cytosine-C(5))-methyltransferase                              |      | 0.06 | 0.04 | 0.05 | 0.06 | 0.04 | 0.02 | 0.03 | 0.04 | 0.10 | 0.05 | 0.03 |
| E9QNN1 | ATP-dependent RNA helicase A                                                     | 0.28 | 0.22 | 0.22 | 0.23 | 0.22 | 0.12 | 0.07 | 0.07 | 0.33 | 0.30 | 0.15 | 0.12 |
| E9QP00 | Transformer-2 protein homolog alpha                                              |      |      |      |      |      |      |      |      |      |      |      | 0.01 |
| E9QP62 | LIM and senescent cell antigen-like-containing domain protein 1                  |      |      |      |      |      |      |      |      |      |      |      | 0.01 |
| E9QPD7 | Pyruvate carboxylase                                                             | 0.46 | 0.26 | 0.16 | 0.19 | 0.12 | 0.16 | 0.02 | 0.01 | 0.10 | 0.52 | 0.08 |      |
| E9QPI5 | Sister chromatid cohesion protein PDS5 homolog A                                 |      | 0.04 | 0.02 | 0.03 | 0.03 | 0.01 |      |      | 0.03 | 0.05 |      | 0.01 |
| F2Z456 | NADH-cytochrome b5 reductase                                                     | 0.10 |      | 0.09 | 0.05 | 0.06 | 0.05 | 0.05 | 0.06 | 0.03 |      | 0.13 | 0.02 |
| F6UND7 | Tyrosine-protein kinase                                                          | 0.04 |      | 0.05 | 0.01 |      | 0.02 |      | 0.01 |      | 0.04 | 0.02 | 0.02 |
| F6VW30 | 14-3-3 protein theta                                                             |      | 0.05 | 0.06 | 0.04 | 0.09 | 0.04 | 0.10 | 0.10 | 0.08 |      | 0.09 | 0.11 |
| F6YVP7 | Protein Gm10260                                                                  | 0.43 | 0.19 | 0.26 | 0.27 | 0.39 | 0.21 | 0.18 | 0.23 |      | 0.29 | 0.27 | 0.36 |
| F7A6H4 | E3 ubiquitin-protein ligase RNF213                                               |      | 0.08 |      |      |      |      |      |      |      |      |      | 0.01 |
| F7C846 | Metaxin-1                                                                        |      | 0.06 | 0.02 | 0.03 | 0.03 | 0.02 |      | 0.02 | 0.02 |      |      | 0.01 |
| F7DEU6 | Inosine-5'-monophosphate dehydrogenase                                           |      |      | 0.04 | 0.02 |      | 0.02 | 0.01 |      | 0.01 |      | 0.02 |      |
| F8VPK0 | Protein Ttc37                                                                    |      |      | 0.02 | 0.01 |      | 0.01 |      |      |      |      |      | 0.01 |
| F8VQC1 | Signal recognition particle subunit SRP72                                        |      | 0.05 | 0.03 | 0.01 |      | 0.02 |      |      | 0.02 | 0.06 |      |      |
| F8WGM5 | Syntaxin-binding protein 2                                                       |      | 0.05 | 0.03 | 0.02 |      | 0.03 | 0.02 | 0.01 | 0.03 |      | 0.02 | 0.01 |
| F8WH69 | Neutrophil cytosol factor 1                                                      | 0.10 | 0.10 | 0.04 | 0.04 | 0.02 | 0.04 | 0.02 |      | 0.02 | 0.09 | 0.03 | 0.04 |
| F8WHQ1 | Tumor protein D52                                                                |      |      |      |      |      |      |      |      |      |      | 0.02 |      |
| F8WIJ0 | Solute carrier family 12 member 4                                                |      |      | 0.02 |      |      |      |      |      |      |      |      |      |
| F8WIV2 | Serpin B6                                                                        | 0.11 | 0.07 | 0.09 | 0.06 | 0.06 | 0.03 | 0.07 | 0.03 | 0.11 |      | 0.13 | 0.07 |
| F8WIV5 | Dynamin-2                                                                        | 0.08 | 0.07 | 0.05 | 0.03 | 0.04 | 0.02 | 0.02 |      | 0.06 |      | 0.03 | 0.03 |
| F8WJA0 | ATP-dependent RNA helicase DDX24                                                 |      | 0.04 |      |      |      |      |      |      |      | 0.07 |      |      |
| F8WJA1 | FXFD domain-containing ion transport regulator 5                                 |      |      |      |      |      |      |      | 0.01 |      |      |      |      |
| F8WJD4 | Symplekin                                                                        | 0.03 | 0.06 | 0.02 | 0.01 |      | 0.03 |      |      | 0.03 | 0.06 |      | 0.01 |
| F8WJE0 | Deoxynucleoside triphosphate triphosphohydrolase SAMHD1                          |      | 0.03 |      |      |      | 0.01 |      |      | 0.01 |      |      | 0.01 |
| G3UWS4 | Serine/threonine-protein phosphatase 2A 65 kDa regulatory subunit A beta isoform |      |      | 0.02 | 0.02 | 0.02 |      |      |      | 0.03 |      | 0.02 | 0.04 |
| G3UXA6 | Polypyrimidine tract-binding protein 3                                           |      | 0.07 | 0.07 | 0.07 | 0.06 | 0.07 | 0.03 | 0.03 | 0.07 | 0.05 | 0.05 | 0.05 |
| G3UXL2 | Protein Prps113                                                                  |      | 0.07 | 0.07 | 0.10 | 0.14 | 0.05 | 0.05 | 0.04 | 0.13 | 0.05 | 0.09 | 0.07 |
| G3UXW9 | COP9 signalosome complex subunit 1                                               |      | 0.04 | 0.03 | 0.01 | 0.02 | 0.01 | 0.02 |      | 0.02 |      | 0.03 | 0.01 |
| G3X8R0 | Receptor expression-enhancing protein                                            |      |      |      |      |      |      |      | 0.03 |      |      |      | 0.02 |
| G3X8T3 | Carboxypeptidase                                                                 |      |      |      |      | 0.01 | 0.02 |      | 0.02 |      |      |      | 0.01 |
| G3X8Y3 | N-alpha-acetyltransferase 15, NatA auxiliary subunit                             |      | 0.05 | 0.02 | 0.03 | 0.02 | 0.01 |      | 0.01 | 0.04 |      |      | 0.02 |
| G3X8Y8 | Toll-like receptor                                                               |      | 0.03 | 0.01 | 0.01 | 0.02 |      |      |      | 0.02 | 0.05 | 0.02 |      |
| G3X914 | Cullin 5                                                                         |      |      |      |      |      |      |      |      |      |      |      | 0.01 |
| G3X956 | FACT complex subunit SPT16                                                       |      | 0.12 | 0.03 | 0.02 | 0.03 | 0.04 | 0.02 |      | 0.05 | 0.19 | 0.02 |      |
| G3X972 | Protein Sec24c                                                                   |      | 0.05 |      |      |      |      | 0.01 |      | 0.01 | 0.05 |      |      |
| G3X9B1 | HEAT repeat containing 1                                                         |      |      | 0.02 | 0.01 |      |      |      |      |      |      |      |      |
| G3X9M0 | 28S ribosomal protein S29, mitochondrial                                         | 0.10 | 0.05 | 0.03 | 0.04 |      | 0.03 | 0.01 | 0.01 | 0.03 |      | 0.02 | 0.01 |
| G3X9Q3 | Histocompatibility (Minor) HA-1, isoform CRA_a                                   |      | 0.04 | 0.02 | 0.03 |      | 0.01 |      |      |      |      |      | 0.01 |
| G3XA48 | Isopentenyl-diphosphate Delta-isomerase 1                                        |      |      |      | 0.01 | 0.02 | 0.02 |      |      | 0.02 |      |      | 0.02 |
| G4V4Z1 | Gag-pro-pol polyprotein                                                          |      |      | 0.02 | 0.02 |      |      |      | 0.01 |      |      | 0.02 |      |
| G5E829 | Plasma membrane calcium-transporting ATPase 1                                    | 0.08 | 0.10 | 0.05 | 0.05 | 0.03 | 0.03 | 0.03 | 0.03 | 0.04 | 0.12 | 0.06 | 0.02 |
| G5E866 | Splicing factor 3B subunit 1                                                     | 0.07 | 0.07 | 0.06 | 0.05 | 0.05 | 0.02 | 0.01 | 0.02 | 0.05 | 0.07 | 0.04 | 0.04 |

|        |                                                                               |      |      |      |      |      |      |      |      |      |      |      |      |
|--------|-------------------------------------------------------------------------------|------|------|------|------|------|------|------|------|------|------|------|------|
| G5E896 | Enhancer of mRNA decapping 4, isoform CRA_b                                   |      | 0.05 |      |      |      |      |      |      |      | 0.08 |      |      |
| G5E8U5 | 28S ribosomal protein S10, mitochondrial                                      |      |      |      |      |      |      |      |      |      |      |      | 0.03 |
| H3BJW3 | Cleavage and polyadenylation-specificity factor subunit 6                     |      | 0.04 | 0.02 | 0.02 | 0.02 | 0.02 |      |      |      | 0.04 |      |      |
| I1E4X5 | Protein 9030624J02Rik                                                         |      | 0.03 |      |      |      |      |      |      |      |      |      |      |
| I7DM66 | PexRAP                                                                        | 0.06 | 0.04 | 0.09 | 0.04 | 0.04 | 0.03 | 0.04 | 0.02 | 0.03 |      | 0.07 | 0.01 |
| J3QMG3 | Voltage-dependent anion-selective channel protein 3                           | 0.14 | 0.15 | 0.13 | 0.08 | 0.17 | 0.08 | 0.09 | 0.06 | 0.19 | 0.16 | 0.15 | 0.09 |
| J3QN31 | Adenylosuccinate synthetase isozyme 1                                         |      |      | 0.01 |      | 0.07 | 0.02 | 0.03 | 0.02 | 0.07 |      | 0.04 | 0.06 |
| J9RV59 | Anion exchange protein                                                        |      |      | 0.02 |      |      |      |      |      |      |      |      |      |
| M1VMF6 | Metastasis-associated protein MTA1 isoform 9                                  |      |      |      |      |      |      |      |      | 0.01 |      |      |      |
| O08528 | Hexokinase-2                                                                  | 0.16 | 0.17 | 0.15 | 0.15 | 0.08 | 0.07 | 0.10 | 0.08 | 0.16 | 0.25 | 0.14 | 0.16 |
| O08529 | Calpain-2 catalytic subunit                                                   |      |      |      |      |      |      |      |      |      |      |      | 0.01 |
| O08547 | Vesicle-trafficking protein SEC22b                                            | 0.16 | 0.15 | 0.10 | 0.15 | 0.09 | 0.10 | 0.03 | 0.06 | 0.08 | 0.16 | 0.07 | 0.12 |
| O08553 | Dihydropyrimidinase-related protein 2                                         |      |      |      |      |      |      |      | 0.01 | 0.01 |      |      | 0.01 |
| O08582 | GTP-binding protein 1                                                         | 0.04 | 0.04 |      | 0.01 |      | 0.01 |      |      | 0.02 | 0.08 |      |      |
| O08599 | Syntaxin-binding protein 1                                                    |      |      | 0.03 |      |      |      |      |      |      |      |      | 0.02 |
| O08734 | Bcl-2 homologous antagonist/killer                                            |      |      | 0.02 | 0.02 | 0.03 | 0.01 | 0.01 | 0.01 | 0.02 |      |      | 0.03 |
| O08749 | Dihydrolipoyl dehydrogenase, mitochondrial                                    | 0.08 | 0.09 | 0.07 | 0.07 | 0.07 | 0.02 | 0.05 | 0.07 | 0.06 | 0.06 | 0.07 | 0.07 |
| O08756 | 3-hydroxyacyl-CoA dehydrogenase type-2                                        | 0.11 | 0.12 | 0.09 | 0.17 | 0.09 | 0.10 | 0.03 | 0.05 | 0.10 | 0.15 | 0.09 | 0.07 |
| O09061 | Proteasome subunit beta type-1                                                |      |      |      |      |      |      |      |      |      |      |      | 0.01 |
| O09131 | Glutathione S-transferase omega-1                                             |      |      | 0.02 |      |      |      |      |      | 0.02 |      |      |      |
| O09167 | 60S ribosomal protein L21                                                     |      | 0.08 | 0.04 | 0.05 | 0.03 | 0.02 | 0.02 | 0.05 |      | 0.08 | 0.05 | 0.12 |
| O09172 | Glutamate--cysteine ligase regulatory subunit                                 |      |      | 0.02 |      |      | 0.02 |      |      |      |      |      | 0.01 |
| O35075 | Down syndrome critical region protein 3 homolog                               |      | 0.05 | 0.02 |      |      |      |      |      | 0.02 |      |      |      |
| O35134 | DNA-directed RNA polymerase I subunit RPA1                                    |      |      |      |      |      |      |      |      |      | 0.06 |      |      |
| O35218 | Cleavage and polyadenylation specificity factor subunit 2                     |      |      |      |      | 0.02 |      |      |      | 0.02 |      |      |      |
| O35295 | Transcriptional activator protein Pur-beta                                    |      | 0.04 |      | 0.02 |      | 0.02 |      |      | 0.02 |      |      |      |
| O35379 | Multidrug resistance-associated protein 1                                     |      |      | 0.02 | 0.02 |      |      |      | 0.02 |      |      | 0.02 |      |
| O35593 | 26S proteasome non-ATPase regulatory subunit 14                               | 0.10 | 0.10 | 0.09 | 0.07 | 0.07 | 0.06 | 0.05 | 0.05 | 0.07 | 0.08 | 0.07 | 0.06 |
| O35604 | Niemann-Pick C1 protein                                                       |      |      | 0.02 |      |      | 0.01 | 0.01 |      | 0.01 |      | 0.02 |      |
| O35685 | Nuclear migration protein nudC                                                |      |      | 0.02 |      |      |      |      |      |      |      | 0.02 |      |
| O35704 | Serine palmitoyltransferase 1                                                 |      |      | 0.02 |      |      |      |      |      |      |      |      |      |
| O35841 | Apoptosis inhibitor 5                                                         |      | 0.08 | 0.02 | 0.03 |      | 0.02 | 0.02 |      | 0.01 | 0.11 | 0.02 | 0.01 |
| O35857 | Mitochondrial import inner membrane translocase subunit TIM44                 |      |      | 0.04 | 0.02 |      | 0.01 | 0.04 | 0.02 | 0.04 |      | 0.04 | 0.02 |
| O35864 | COP9 signalosome complex subunit 5                                            | 0.04 |      | 0.02 |      | 0.02 | 0.01 | 0.01 | 0.01 | 0.02 |      |      | 0.01 |
| O35972 | 39S ribosomal protein L23, mitochondrial                                      |      |      | 0.01 | 0.04 |      | 0.01 |      | 0.00 |      |      |      | 0.08 |
| O54734 | Dolichyl-diphosphooligosaccharide--protein glycosyltransferase 48 kDa subunit | 0.14 | 0.10 | 0.18 | 0.16 | 0.16 | 0.08 | 0.13 | 0.12 | 0.14 | 0.10 | 0.21 | 0.09 |
| O54752 | Naglu                                                                         |      |      | 0.03 |      | 0.02 | 0.01 | 0.04 |      | 0.02 |      | 0.05 |      |
| O54774 | AP-3 complex subunit delta-1                                                  |      |      |      |      |      |      |      |      | 0.01 |      |      |      |
| O54946 | DnaJ homolog subfamily B member 6                                             |      |      | 0.01 |      |      |      |      |      |      |      |      |      |
| O54984 | ATPase Asna1                                                                  |      |      | 0.05 | 0.05 | 0.03 | 0.07 | 0.04 | 0.01 | 0.06 |      | 0.07 |      |
| O54988 | STE20-like serine/threonine-protein kinase                                    | 0.06 | 0.04 |      |      |      |      |      |      | 0.02 | 0.07 | 0.02 | 0.01 |
| O55013 | Trafficking protein particle complex subunit 3                                |      |      | 0.02 | 0.01 |      |      | 0.01 |      |      |      |      | 0.02 |
| O55022 | Membrane-associated progesterone receptor component 1                         |      |      | 0.02 | 0.03 |      |      | 0.02 | 0.01 |      |      | 0.03 |      |
| O55029 | Coatamer subunit beta'                                                        |      | 0.04 | 0.03 | 0.02 | 0.02 |      | 0.02 |      |      | 0.05 | 0.03 |      |
| O55100 | Synaptogyrin-1                                                                |      |      | 0.04 | 0.03 | 0.04 | 0.01 | 0.03 | 0.02 |      |      | 0.04 | 0.02 |
| O55142 | 60S ribosomal protein L35a                                                    |      |      |      |      |      | 0.01 |      | 0.09 |      |      |      | 0.13 |
| O55201 | Transcription elongation factor SPT5                                          |      | 0.04 |      |      |      | 0.01 |      |      |      |      |      |      |

|        |                                                                |      |      |      |      |      |      |      |      |      |      |      |      |
|--------|----------------------------------------------------------------|------|------|------|------|------|------|------|------|------|------|------|------|
| O55234 | Proteasome subunit beta type-5                                 |      |      |      |      | 0.02 |      |      |      |      |      |      | 0.02 |
| O70145 | Neutrophil cytosol factor 2                                    |      | 0.05 | 0.05 | 0.04 | 0.02 | 0.02 | 0.03 |      | 0.07 | 0.04 | 0.06 | 0.02 |
| O70152 | Dolichol-phosphate mannosyltransferase subunit 1               | 0.04 | 0.04 | 0.03 | 0.06 |      | 0.02 |      | 0.01 | 0.02 |      | 0.02 | 0.02 |
| O70194 | Eukaryotic translation initiation factor 3 subunit D           |      | 0.03 | 0.02 | 0.03 |      | 0.02 |      | 0.01 | 0.03 |      | 0.02 | 0.02 |
| O70251 | Elongation factor 1-beta                                       | 0.04 | 0.07 | 0.03 | 0.02 | 0.03 | 0.02 | 0.02 | 0.02 | 0.03 |      | 0.04 | 0.04 |
| O70252 | Heme oxygenase 2                                               |      |      | 0.02 |      |      | 0.01 | 0.01 |      | 0.02 |      |      |      |
| O70404 | Vesicle-associated membrane protein 8                          |      |      |      |      |      |      |      | 0.02 |      |      |      | 0.02 |
| O70439 | Syntaxin-7                                                     |      | 0.04 | 0.02 |      | 0.02 | 0.03 | 0.02 |      | 0.01 |      | 0.03 |      |
| O70469 | Docking protein 2                                              |      |      | 0.05 | 0.04 |      |      | 0.02 | 0.02 |      |      | 0.05 | 0.03 |
| O70480 | Vesicle-associated membrane protein 4                          |      |      |      |      |      |      |      | 0.01 |      |      |      |      |
| O70492 | Sorting nexin-3                                                |      |      |      |      |      | 0.01 |      |      |      |      |      | 0.02 |
| O70499 | Small nuclear ribonucleoprotein-associated protein             |      | 0.06 | 0.01 | 0.03 |      | 0.02 |      |      | 0.01 | 0.04 | 0.02 | 0.01 |
| O70503 | Very-long-chain 3-oxoacyl-CoA reductase                        | 0.07 | 0.10 | 0.08 | 0.12 | 0.06 | 0.04 | 0.02 | 0.06 | 0.06 | 0.05 | 0.07 | 0.10 |
| O70569 | Ribosomal protein S14                                          |      | 0.09 | 0.15 | 0.13 | 0.09 | 0.10 | 0.10 | 0.08 |      | 0.13 | 0.12 | 0.16 |
| O88384 | Vesicle transport through interaction with t-SNAREs homolog 1B |      |      | 0.02 |      |      |      | 0.02 |      |      |      | 0.03 |      |
| O88441 | Metaxin-2                                                      |      |      | 0.03 | 0.05 | 0.04 | 0.02 | 0.01 | 0.01 | 0.03 |      | 0.03 | 0.01 |
| O88456 | Calpain small subunit 1                                        |      |      | 0.04 | 0.04 |      | 0.02 | 0.04 | 0.01 |      |      | 0.05 | 0.01 |
| O88543 | COP9 signalosome complex subunit 3                             |      | 0.03 | 0.02 |      |      |      | 0.01 |      |      |      | 0.02 | 0.01 |
| O88569 | Heterogeneous nuclear ribonucleoproteins A2/B1                 | 0.18 | 0.17 | 0.12 | 0.16 | 0.20 | 0.15 | 0.07 | 0.06 | 0.19 | 0.13 | 0.12 | 0.16 |
| O88587 | Catechol O-methyltransferase                                   |      |      |      | 0.03 | 0.02 |      | 0.02 | 0.02 | 0.02 |      | 0.04 | 0.02 |
| O88696 | ATP-dependent Clp protease proteolytic subunit, mitochondrial  |      | 0.05 | 0.01 | 0.06 |      | 0.03 |      | 0.01 |      |      | 0.02 | 0.01 |
| O88738 | Baculoviral IAP repeat-containing protein 6                    |      | 0.04 |      |      |      |      |      |      | 0.02 |      |      |      |
| O88783 | Coagulation factor V                                           |      |      | 0.03 |      |      |      | 0.02 | 0.01 |      |      | 0.04 |      |
| O88796 | Ribonuclease P protein subunit p30                             |      |      |      |      |      |      |      |      |      |      | 0.02 | 0.01 |
| O88952 | Protein lin-7 homolog C                                        |      |      |      |      |      | 0.01 | 0.02 |      |      |      |      |      |
| O88967 | ATP-dependent zinc metalloprotease YME1L1                      |      | 0.05 |      | 0.02 |      | 0.01 |      |      |      |      |      | 0.01 |
| O88986 | 2-amino-3-ketobutyrate coenzyme A ligase, mitochondrial        |      | 0.04 |      | 0.04 |      | 0.01 |      |      | 0.02 |      |      |      |
| O89017 | Legumain                                                       |      | 0.03 | 0.05 | 0.04 | 0.06 | 0.05 | 0.02 | 0.02 | 0.05 |      | 0.03 | 0.02 |
| O89023 | Tripeptidyl-peptidase 1                                        |      |      |      |      |      |      | 0.02 |      |      |      |      |      |
| O89079 | Coatmer subunit epsilon                                        | 0.07 | 0.04 | 0.03 |      | 0.02 | 0.02 |      |      | 0.02 |      | 0.02 | 0.02 |
| P00375 | Dihydrofolate reductase                                        |      |      |      | 0.01 | 0.03 |      |      | 0.01 |      |      |      | 0.03 |
| P00493 | Hypoxanthine-guanine phosphoribosyltransferase                 |      |      |      |      |      |      |      | 0.01 |      |      |      | 0.01 |
| P00920 | Carbonic anhydrase 2                                           |      |      |      |      | 0.04 |      |      | 0.01 | 0.03 |      | 0.02 | 0.05 |
| P01887 | Beta-2-microglobulin                                           |      |      |      |      |      |      |      | 0.01 |      |      |      | 0.01 |
| P01897 | H-2 class I histocompatibility antigen, L-D alpha chain        |      | 0.04 | 0.06 | 0.02 | 0.03 | 0.02 | 0.05 | 0.03 | 0.03 |      | 0.07 | 0.03 |
| P01900 | H-2 class I histocompatibility antigen, D-D alpha chain        |      | 0.04 | 0.07 | 0.04 | 0.04 | 0.03 | 0.06 | 0.04 | 0.03 |      | 0.08 | 0.03 |
| P05132 | cAMP-dependent protein kinase catalytic subunit alpha          |      | 0.03 | 0.03 | 0.01 |      | 0.01 | 0.02 |      | 0.03 |      | 0.03 | 0.01 |
| P05202 | Aspartate aminotransferase, mitochondrial                      |      |      | 0.02 | 0.03 | 0.19 | 0.03 | 0.03 | 0.24 | 0.17 |      | 0.08 | 0.30 |
| P06745 | Glucose-6-phosphate isomerase                                  |      | 0.09 | 0.02 | 0.03 | 0.28 | 0.02 | 0.18 | 0.20 | 0.27 | 0.05 | 0.25 | 0.35 |
| P06804 | Tumor necrosis factor                                          |      |      | 0.06 | 0.01 |      |      | 0.05 |      |      |      | 0.08 |      |
| P08003 | Protein disulfide-isomerase A4                                 |      |      | 0.06 | 0.03 | 0.09 | 0.02 | 0.13 | 0.13 | 0.05 |      | 0.13 | 0.08 |
| P08030 | Adenine phosphoribosyltransferase                              |      |      |      | 0.03 | 0.08 |      | 0.03 | 0.04 |      |      | 0.02 | 0.11 |
| P08249 | Malate dehydrogenase, mitochondrial                            |      | 0.04 | 0.05 | 0.07 | 0.38 | 0.10 | 0.17 | 0.18 | 0.17 |      | 0.31 | 0.24 |
| P08752 | Guanine nucleotide-binding protein G(i) subunit alpha-2        | 0.32 | 0.23 | 0.21 | 0.28 | 0.20 | 0.16 | 0.16 | 0.17 | 0.27 | 0.26 | 0.25 | 0.19 |
| P08775 | DNA-directed RNA polymerase II subunit RPB1                    |      | 0.03 |      |      |      |      |      |      |      |      |      |      |
| P09055 | Integrin beta-1                                                |      |      | 0.02 |      |      |      | 0.02 |      |      |      | 0.02 |      |
| P09103 | Protein disulfide-isomerase                                    |      |      | 0.02 |      | 0.04 |      | 0.10 | 0.16 | 0.01 |      | 0.10 | 0.08 |
| P09405 | Nucleolin                                                      | 0.25 | 0.24 | 0.15 | 0.17 | 0.23 | 0.12 | 0.04 | 0.03 | 0.22 | 0.29 | 0.12 | 0.04 |

|        |                                                                                    |      |      |      |      |      |      |      |      |      |      |      |      |      |
|--------|------------------------------------------------------------------------------------|------|------|------|------|------|------|------|------|------|------|------|------|------|
| P09411 | Phosphoglycerate kinase 1                                                          |      |      |      | 0.08 |      | 0.38 | 0.01 | 0.32 | 0.57 | 0.31 |      | 0.39 | 0.60 |
| P09450 | Transcription factor jun-B                                                         |      |      |      | 0.01 |      |      |      |      |      |      |      |      |      |
| P10605 | Cathepsin B                                                                        |      | 0.05 | 0.03 | 0.04 |      |      | 0.03 |      |      | 0.03 |      |      |      |
| P10639 | Thioredoxin                                                                        |      |      |      |      |      |      |      |      | 0.04 |      |      |      | 0.05 |
| P10833 | Ras-related protein R-Ras                                                          |      |      |      |      |      |      | 0.02 | 0.01 |      | 0.02 |      |      | 0.01 |
| P10852 | 4F2 cell-surface antigen heavy chain                                               | 0.06 | 0.06 | 0.12 | 0.10 | 0.13 | 0.07 | 0.10 | 0.13 | 0.11 | 0.11 | 0.14 | 0.14 | 0.06 |
| P11152 | Lipoprotein lipase                                                                 |      |      |      | 0.03 |      |      |      |      | 0.02 |      |      |      | 0.02 |
| P11440 | Cyclin-dependent kinase 1                                                          | 0.10 | 0.08 | 0.04 | 0.02 | 0.04 | 0.04 | 0.01 | 0.02 | 0.03 | 0.10 | 0.02 | 0.02 | 0.03 |
| P11499 | Heat shock protein HSP 90-beta                                                     | 1.31 | 0.96 | 1.06 | 1.09 | 1.42 | 0.83 | 1.05 | 0.85 | 1.80 | 1.57 | 1.37 | 1.12 |      |
| P11688 | Integrin alpha-5                                                                   |      |      |      |      |      |      |      |      |      |      |      | 0.02 |      |
| P11835 | Integrin beta-2                                                                    |      | 0.05 | 0.36 | 0.20 | 0.06 | 0.04 | 0.31 | 0.16 | 0.04 | 0.07 | 0.38 | 0.04 | 0.04 |
| P11983 | T-complex protein 1 subunit alpha                                                  | 0.38 | 0.33 | 0.19 | 0.19 | 0.38 | 0.14 | 0.24 | 0.16 | 0.34 | 0.34 | 0.28 | 0.29 |      |
| P12382 | ATP-dependent 6-phosphofructokinase, liver type                                    | 0.19 | 0.11 | 0.12 | 0.08 | 0.02 | 0.06 | 0.04 | 0.04 | 0.08 | 0.16 | 0.11 | 0.09 |      |
| P12787 | Cytochrome c oxidase subunit 5A, mitochondrial                                     |      |      |      |      |      |      |      |      | 0.01 |      |      |      | 0.02 |
| P12815 | Programmed cell death protein 6                                                    |      |      |      |      |      |      |      |      |      |      |      |      | 0.03 |
| P13020 | Gelsolin                                                                           |      |      |      |      | 0.02 |      |      | 0.03 |      | 0.04 |      | 0.02 | 0.01 |
| P14115 | 60S ribosomal protein L27a                                                         | 0.15 | 0.04 | 0.10 | 0.09 | 0.08 | 0.07 | 0.08 | 0.05 |      | 0.08 | 0.09 | 0.13 |      |
| P14148 | 60S ribosomal protein L7                                                           | 0.25 | 0.22 | 0.23 | 0.25 | 0.27 | 0.12 | 0.15 | 0.20 | 0.23 | 0.15 | 0.24 | 0.40 |      |
| P14152 | Malate dehydrogenase, cytoplasmic                                                  |      |      |      |      | 0.02 |      |      |      | 0.01 |      |      |      | 0.04 |
| P14211 | Calreticulin                                                                       |      |      |      |      |      |      | 0.02 | 0.02 | 0.01 |      | 0.02 | 0.01 |      |
| P14234 | Tyrosine-protein kinase Fgr                                                        |      | 0.03 | 0.05 | 0.04 |      | 0.02 | 0.01 | 0.02 |      |      | 0.04 | 0.03 |      |
| P14576 | Signal recognition particle 54 kDa protein                                         |      |      | 0.02 |      |      |      |      | 0.02 |      |      |      | 0.02 |      |
| P14685 | 26S proteasome non-ATPase regulatory subunit 3                                     | 0.09 | 0.12 | 0.09 | 0.11 | 0.06 | 0.06 | 0.04 | 0.03 | 0.08 | 0.10 | 0.08 | 0.08 |      |
| P14733 | Lamin-B1                                                                           | 0.18 | 0.16 | 0.06 | 0.03 | 0.04 | 0.06 |      |      | 0.02 | 0.14 |      |      |      |
| P14824 | Annexin A6                                                                         |      |      | 0.03 |      |      |      | 0.02 |      | 0.02 |      | 0.03 |      |      |
| P15532 | Nucleoside diphosphate kinase A                                                    |      |      |      |      | 0.03 |      |      |      | 0.02 |      |      |      | 0.04 |
| P16045 | Galectin-1                                                                         |      |      |      |      |      |      |      |      | 0.03 |      |      |      | 0.03 |
| P16110 | Galectin-3                                                                         |      |      | 0.10 | 0.02 | 0.09 | 0.06 | 0.05 | 0.03 | 0.08 |      | 0.09 | 0.01 |      |
| P17426 | AP-2 complex subunit alpha-1                                                       |      | 0.07 | 0.03 | 0.04 | 0.04 | 0.02 | 0.02 | 0.01 | 0.07 | 0.11 | 0.06 | 0.04 |      |
| P17439 | Glucosylceramidase                                                                 |      |      | 0.04 |      |      |      |      |      | 0.01 |      |      | 0.05 |      |
| P17710 | Hexokinase-1                                                                       | 0.04 | 0.03 | 0.05 | 0.04 | 0.03 | 0.02 | 0.05 | 0.10 | 0.04 | 0.05 | 0.07 | 0.10 |      |
| P17742 | Peptidyl-prolyl cis-trans isomerase A                                              |      |      |      |      | 0.09 |      | 0.03 | 0.09 | 0.03 |      |      |      | 0.19 |
| P17751 | Triosephosphate isomerase                                                          | 0.07 | 0.06 | 0.08 | 0.09 | 0.15 | 0.08 | 0.11 | 0.23 | 0.06 |      | 0.12 | 0.23 |      |
| P17809 | Solute carrier family 2, facilitated glucose transporter member 1                  |      |      | 0.18 | 0.13 |      | 0.01 | 0.14 | 0.16 |      |      | 0.17 | 0.09 |      |
| P17879 | Heat shock 70 kDa protein 1B                                                       | 0.15 | 0.08 | 0.07 | 0.09 | 0.10 | 0.06 | 0.11 | 0.10 | 0.06 | 0.11 | 0.14 | 0.09 |      |
| P17918 | Proliferating cell nuclear antigen                                                 | 0.45 | 0.38 | 0.23 | 0.28 | 0.39 | 0.27 | 0.18 | 0.18 | 0.44 | 0.40 | 0.27 | 0.18 |      |
| P18155 | Bifunctional methylenetetrahydrofolate dehydrogenase/cyclohydrolase, mitochondrial | 0.04 | 0.04 | 0.03 | 0.06 | 0.03 | 0.03 | 0.01 |      | 0.03 | 0.05 | 0.03 |      |      |
| P18572 | Basigin                                                                            |      |      | 0.14 | 0.08 | 0.04 | 0.02 | 0.12 | 0.11 | 0.04 |      | 0.13 | 0.03 |      |
| P18760 | Cofilin-1                                                                          | 0.34 | 0.19 | 0.29 | 0.25 | 0.57 | 0.31 | 0.33 | 0.93 | 0.21 | 0.25 | 0.39 | 0.83 |      |
| P19096 | Fatty acid synthase                                                                | 0.45 | 0.37 | 0.38 | 0.26 | 0.29 | 0.16 | 0.29 | 0.09 | 0.73 | 0.70 | 0.46 | 0.42 |      |
| P20029 | 78 kDa glucose-regulated protein                                                   | 0.57 | 0.48 | 0.34 | 0.41 | 0.44 | 0.28 | 0.42 | 0.66 | 0.26 | 0.80 | 0.59 | 0.47 |      |
| P20108 | Thioredoxin-dependent peroxide reductase, mitochondrial                            |      |      | 0.03 | 0.05 | 0.12 | 0.05 | 0.07 | 0.08 | 0.07 | 0.05 | 0.07 | 0.10 |      |
| P21279 | Guanine nucleotide-binding protein G(q) subunit alpha                              |      |      | 0.03 |      |      |      | 0.01 | 0.02 | 0.01 | 0.02 |      | 0.04 |      |
| P21619 | Lamin-B2                                                                           |      | 0.03 | 0.02 |      |      |      | 0.01 |      |      |      |      |      |      |
| P22437 | Prostaglandin G/H synthase 1                                                       |      |      | 0.03 |      |      |      |      | 0.02 |      |      | 0.02 | 0.01 |      |
| P23116 | Eukaryotic translation initiation factor 3 subunit A                               | 0.21 | 0.20 | 0.20 | 0.21 | 0.17 | 0.15 | 0.10 | 0.08 | 0.31 | 0.29 | 0.17 | 0.20 |      |
| P24527 | Leukotriene A-4 hydrolase                                                          |      |      |      |      |      |      |      |      | 0.01 |      |      | 0.02 |      |
| P24547 | Inosine-5'-monophosphate dehydrogenase 2                                           |      |      | 0.01 | 0.02 |      |      | 0.01 |      | 0.01 |      | 0.02 | 0.01 |      |
| P24668 | Cation-dependent mannose-6-phosphate receptor                                      | 0.05 | 0.07 | 0.10 | 0.07 |      | 0.04 | 0.05 | 0.01 | 0.03 |      | 0.09 |      |      |

|        |                                                                                |      |      |      |      |      |      |      |      |      |      |      |      |
|--------|--------------------------------------------------------------------------------|------|------|------|------|------|------|------|------|------|------|------|------|
| P25206 | DNA replication licensing factor MCM3                                          | 0.08 | 0.12 | 0.02 | 0.02 | 0.07 | 0.05 |      |      | 0.09 | 0.13 |      | 0.01 |
| P25444 | 40S ribosomal protein S2                                                       | 0.32 | 0.27 | 0.27 | 0.28 | 0.27 | 0.16 | 0.21 | 0.17 | 0.27 | 0.25 | 0.28 | 0.28 |
| P26041 | Moesin                                                                         |      |      | 0.05 | 0.01 | 0.13 |      | 0.10 | 0.07 | 0.08 |      | 0.12 | 0.12 |
| P26443 | Glutamate dehydrogenase 1, mitochondrial                                       | 0.05 | 0.07 | 0.12 |      | 0.02 |      | 0.09 | 0.01 | 0.03 | 0.06 | 0.12 | 0.04 |
| P26516 | 26S proteasome non-ATPase regulatory subunit 7                                 |      | 0.05 | 0.07 | 0.07 | 0.05 | 0.04 | 0.04 | 0.01 | 0.06 | 0.04 | 0.07 | 0.02 |
| P27046 | Alpha-mannosidase 2                                                            |      |      | 0.02 | 0.02 |      |      |      |      |      |      | 0.02 | 0.01 |
| P27601 | Guanine nucleotide-binding protein subunit alpha-13                            |      | 0.04 | 0.05 | 0.06 | 0.07 | 0.04 | 0.04 | 0.05 | 0.10 |      | 0.08 | 0.04 |
| P27612 | Phospholipase A-2-activating protein                                           |      | 0.05 |      |      |      | 0.02 |      |      |      | 0.10 |      |      |
| P27659 | 60S ribosomal protein L3                                                       | 0.13 | 0.18 | 0.22 | 0.16 | 0.14 | 0.11 | 0.14 | 0.11 | 0.12 | 0.17 | 0.19 | 0.26 |
| P27773 | Protein disulfide-isomerase A3                                                 |      | 0.08 | 0.23 | 0.08 | 0.27 | 0.07 | 0.45 | 0.55 | 0.16 | 0.12 | 0.56 | 0.39 |
| P28658 | Ataxin-10                                                                      | 0.05 | 0.04 | 0.02 | 0.02 |      | 0.03 |      |      | 0.02 | 0.07 | 0.02 | 0.01 |
| P29341 | Polyadenylate-binding protein 1                                                | 0.07 | 0.06 | 0.03 | 0.04 | 0.02 | 0.02 |      | 0.01 | 0.02 | 0.07 | 0.02 | 0.03 |
| P29391 | Ferritin light chain 1                                                         |      |      |      |      | 0.02 |      |      |      |      |      |      |      |
| P29452 | Caspase-1                                                                      | 0.04 | 0.03 | 0.03 |      |      | 0.01 |      |      | 0.02 |      |      |      |
| P30355 | Arachidonate 5-lipoxygenase-activating protein                                 |      |      | 0.03 | 0.05 | 0.04 |      | 0.04 | 0.05 |      |      | 0.04 | 0.07 |
| P30416 | Peptidyl-prolyl cis-trans isomerase FKBP4                                      |      | 0.03 | 0.02 | 0.02 | 0.04 | 0.02 | 0.03 | 0.02 | 0.05 |      | 0.04 | 0.03 |
| P30993 | C5a anaphylatoxin chemotactic receptor 1                                       |      |      | 0.02 | 0.02 |      |      |      | 0.01 |      |      |      | 0.01 |
| P31938 | Dual specificity mitogen-activated protein kinase kinase 1                     |      | 0.05 | 0.03 | 0.05 |      | 0.01 | 0.02 |      | 0.02 |      | 0.03 | 0.02 |
| P31996 | Macrosialin                                                                    |      |      | 0.03 |      | 0.04 | 0.03 | 0.02 | 0.01 | 0.03 |      | 0.04 |      |
| P32067 | Lupus La protein homolog                                                       |      | 0.02 | 0.03 | 0.02 | 0.04 | 0.02 | 0.03 | 0.01 | 0.03 |      | 0.04 | 0.01 |
| P32921 | Tryptophan--tRNA ligase, cytoplasmic                                           |      | 0.08 | 0.01 | 0.02 | 0.04 | 0.02 | 0.04 | 0.01 | 0.02 | 0.10 | 0.02 | 0.05 |
| P33175 | Kinesin heavy chain isoform 5A                                                 |      | 0.03 | 0.07 | 0.07 | 0.03 | 0.04 | 0.04 | 0.01 | 0.07 | 0.10 | 0.05 | 0.01 |
| P34022 | Ran-specific GTPase-activating protein                                         |      | 0.05 | 0.02 | 0.03 | 0.05 | 0.03 | 0.03 | 0.04 | 0.05 |      | 0.03 | 0.06 |
| P34884 | Macrophage migration inhibitory factor                                         |      |      |      |      |      |      |      | 0.01 |      |      |      | 0.02 |
| P35123 | Ubiquitin carboxyl-terminal hydrolase 4                                        |      | 0.03 |      |      |      |      |      |      |      |      |      |      |
| P35276 | Ras-related protein Rab-3D                                                     | 0.05 |      | 0.02 | 0.02 | 0.07 | 0.02 | 0.04 | 0.04 | 0.03 |      | 0.04 | 0.03 |
| P35279 | Ras-related protein Rab-6A                                                     | 0.13 | 0.07 | 0.07 | 0.10 | 0.16 | 0.07 | 0.09 | 0.06 | 0.11 | 0.07 | 0.09 | 0.09 |
| P35293 | Ras-related protein Rab-18                                                     | 0.06 | 0.04 | 0.04 | 0.06 | 0.05 | 0.04 | 0.03 | 0.02 | 0.05 |      | 0.05 | 0.04 |
| P35456 | Urokinase plasminogen activator surface receptor                               |      |      |      |      |      |      |      |      |      |      | 0.02 |      |
| P35486 | Pyruvate dehydrogenase E1 component subunit alpha, somatic form, mitochondrial |      |      | 0.05 | 0.04 | 0.06 |      | 0.06 | 0.07 | 0.05 | 0.04 | 0.10 | 0.03 |
| P35550 | rRNA 2'-O-methyltransferase fibrillar                                          | 0.08 | 0.07 | 0.07 | 0.06 | 0.07 | 0.05 | 0.02 | 0.02 | 0.05 | 0.08 | 0.03 | 0.04 |
| P35585 | AP-1 complex subunit mu-1                                                      |      |      | 0.04 | 0.02 | 0.02 | 0.01 |      |      | 0.02 |      | 0.02 | 0.01 |
| P35700 | Peroxiredoxin-1                                                                | 0.41 | 0.27 | 0.22 | 0.37 | 0.73 | 0.26 | 0.31 | 0.34 | 0.29 | 0.38 | 0.40 | 0.29 |
| P35979 | 60S ribosomal protein L12                                                      | 0.15 | 0.10 | 0.05 | 0.11 | 0.15 | 0.06 | 0.04 | 0.22 |      | 0.12 | 0.06 | 0.26 |
| P37040 | NADPH--cytochrome P450 reductase                                               |      |      | 0.06 | 0.03 |      | 0.01 | 0.04 | 0.03 |      |      | 0.06 | 0.05 |
| P38060 | Hydroxymethylglutaryl-CoA lyase, mitochondrial                                 | 0.09 | 0.11 | 0.04 | 0.08 | 0.06 | 0.04 | 0.02 | 0.03 | 0.06 | 0.08 | 0.06 | 0.02 |
| P38647 | Stress-70 protein, mitochondrial                                               | 0.33 | 0.33 | 0.35 | 0.38 | 0.59 | 0.20 | 0.39 | 0.37 | 0.34 | 0.40 | 0.54 | 0.25 |
| P40124 | Adenylyl cyclase-associated protein 1                                          |      | 0.05 | 0.03 |      |      |      | 0.05 | 0.01 |      |      | 0.06 | 0.01 |
| P40142 | Transketolase                                                                  |      |      | 0.02 | 0.01 | 0.35 |      | 0.11 | 0.17 | 0.22 |      | 0.14 | 0.42 |
| P40240 | CD9 antigen                                                                    |      |      | 0.02 |      |      |      | 0.02 |      |      |      | 0.03 |      |
| P40336 | Vacuolar protein sorting-associated protein 26A                                | 0.05 | 0.08 | 0.01 | 0.04 | 0.02 | 0.04 | 0.02 | 0.01 | 0.04 | 0.07 | 0.04 | 0.02 |
| P40630 | Transcription factor A, mitochondrial                                          |      |      |      |      | 0.02 |      | 0.01 |      |      |      |      | 0.01 |
| P41105 | 60S ribosomal protein L28                                                      | 0.10 | 0.05 | 0.10 | 0.09 | 0.10 | 0.06 | 0.06 | 0.07 |      | 0.08 | 0.08 | 0.17 |
| P41241 | Tyrosine-protein kinase CSK                                                    |      | 0.04 |      | 0.02 |      |      |      |      |      |      |      |      |
| P42125 | Enoyl-CoA delta isomerase 1, mitochondrial                                     | 0.06 | 0.08 | 0.06 | 0.11 | 0.09 | 0.06 | 0.04 | 0.06 | 0.08 |      | 0.08 | 0.05 |
| P42208 | Septin-2                                                                       |      |      |      |      |      |      |      |      |      |      |      | 0.01 |
| P42669 | Transcriptional activator protein Pur-alpha                                    |      |      | 0.03 |      | 0.03 | 0.01 |      |      | 0.03 |      |      |      |
| P43247 | DNA mismatch repair protein Msh2                                               |      | 0.04 |      |      |      | 0.02 |      |      | 0.01 | 0.09 |      |      |
| P43274 | Histone H1.4                                                                   | 0.13 | 0.11 | 0.13 | 0.27 | 0.23 | 0.10 | 0.10 | 0.32 | 0.12 | 0.12 | 0.15 | 0.13 |
| P43275 | Histone H1.1                                                                   |      | 0.04 | 0.02 | 0.08 | 0.06 | 0.02 | 0.01 | 0.11 | 0.03 |      | 0.03 | 0.01 |



|        |                                                                                                            |      |      |      |      |      |      |  |      |      |      |      |      |      |      |
|--------|------------------------------------------------------------------------------------------------------------|------|------|------|------|------|------|--|------|------|------|------|------|------|------|
| P45376 | Aldose reductase                                                                                           |      |      |      |      | 0.02 | 0.05 |  |      | 0.02 | 0.05 |      |      | 0.02 | 0.08 |
| P45952 | Medium-chain specific acyl-CoA dehydrogenase, mitochondrial                                                |      | 0.06 | 0.09 | 0.04 | 0.03 | 0.02 |  | 0.04 | 0.04 | 0.09 | 0.04 | 0.06 | 0.02 |      |
| P46460 | Vesicle-fusing ATPase                                                                                      | 0.10 | 0.12 | 0.13 | 0.08 | 0.05 | 0.07 |  | 0.04 | 0.02 | 0.06 | 0.11 | 0.06 | 0.06 |      |
| P46664 | Adenylosuccinate synthetase isozyme 2                                                                      |      |      |      |      |      | 0.02 |  | 0.03 | 0.01 | 0.01 |      | 0.04 | 0.03 |      |
| P46737 | Lys-63-specific deubiquitinase BRCC36                                                                      |      | 0.04 | 0.02 | 0.01 |      |      |  |      |      |      |      | 0.02 |      |      |
| P47226 | Testin                                                                                                     |      |      | 0.02 | 0.02 |      | 0.01 |  |      |      |      |      | 0.02 |      |      |
| P47713 | Cytosolic phospholipase A2                                                                                 | 0.14 | 0.12 | 0.16 | 0.12 | 0.08 | 0.08 |  | 0.09 | 0.08 | 0.11 | 0.35 | 0.16 | 0.07 |      |
| P47738 | Aldehyde dehydrogenase, mitochondrial                                                                      |      | 0.04 | 0.10 | 0.07 | 0.13 | 0.02 |  | 0.11 | 0.23 | 0.04 |      | 0.13 | 0.09 |      |
| P47811 | Mitogen-activated protein kinase 14                                                                        |      |      | 0.02 |      |      |      |  |      |      | 0.01 |      |      |      |      |
| P47856 | Glutamine--fructose-6-phosphate aminotransferase [isomerizing] 1                                           | 0.11 | 0.13 | 0.13 | 0.10 |      | 0.03 |  |      |      |      | 0.15 | 0.04 | 0.04 |      |
| P47911 | 60S ribosomal protein L6                                                                                   | 0.36 | 0.30 | 0.29 | 0.41 | 0.41 | 0.18 |  | 0.24 | 0.35 | 0.41 | 0.30 | 0.34 | 0.76 |      |
| P47962 | 60S ribosomal protein L5                                                                                   | 0.47 | 0.35 | 0.24 | 0.20 | 0.24 | 0.12 |  | 0.13 | 0.23 | 0.20 | 0.34 | 0.25 | 0.37 |      |
| P47963 | 60S ribosomal protein L13                                                                                  | 0.26 | 0.19 | 0.30 | 0.46 | 0.39 | 0.27 |  | 0.20 | 0.30 | 0.29 | 0.26 | 0.30 | 0.35 |      |
| P48036 | Annexin A5                                                                                                 | 0.12 | 0.16 | 0.42 | 0.34 | 0.37 | 0.16 |  | 0.34 | 0.15 | 0.44 | 0.08 | 0.67 | 0.33 |      |
| P48678 | Prelamin-A/C                                                                                               | 0.32 | 0.42 | 0.17 | 0.14 | 0.08 | 0.10 |  |      | 0.01 | 0.05 | 0.41 | 0.04 | 0.01 |      |
| P48722 | Heat shock 70 kDa protein 4L                                                                               |      |      | 0.03 | 0.02 |      | 0.01 |  | 0.01 | 0.03 | 0.01 |      | 0.03 | 0.03 |      |
| P48962 | ADP/ATP translocase 1                                                                                      | 0.25 | 0.23 | 0.29 | 0.51 | 0.38 | 0.29 |  | 0.20 | 0.33 | 0.29 | 0.23 | 0.31 | 0.61 |      |
| P48999 | Arachidonate 5-lipoxygenase                                                                                |      |      | 0.07 | 0.03 |      |      |  | 0.03 | 0.02 |      |      | 0.07 | 0.02 |      |
| P50247 | Adenosylhomocysteinase                                                                                     |      | 0.05 |      |      | 0.12 | 0.01 |  | 0.08 | 0.06 | 0.13 | 0.07 | 0.03 | 0.08 |      |
| P50431 | Serine hydroxymethyltransferase, cytosolic                                                                 | 0.07 | 0.03 | 0.06 | 0.11 | 0.07 | 0.06 |  | 0.04 | 0.04 | 0.08 |      | 0.07 | 0.06 |      |
| P50516 | V-type proton ATPase catalytic subunit A                                                                   | 0.17 | 0.18 | 0.16 | 0.11 | 0.08 | 0.08 |  | 0.09 | 0.07 | 0.11 | 0.17 | 0.15 | 0.05 |      |
| P50518 | V-type proton ATPase subunit E 1                                                                           | 0.05 | 0.06 | 0.11 | 0.06 | 0.03 | 0.05 |  | 0.10 | 0.05 | 0.06 |      | 0.11 | 0.03 |      |
| P50544 | Very long-chain specific acyl-CoA dehydrogenase, mitochondrial                                             | 0.04 | 0.07 | 0.07 | 0.08 | 0.02 | 0.02 |  | 0.01 |      | 0.03 |      | 0.05 | 0.01 |      |
| P51150 | Ras-related protein Rab-7a                                                                                 | 0.28 | 0.14 | 0.11 | 0.11 | 0.33 | 0.14 |  | 0.12 | 0.11 | 0.28 | 0.17 | 0.19 | 0.11 |      |
| P51174 | Long-chain specific acyl-CoA dehydrogenase, mitochondrial                                                  | 0.07 | 0.07 | 0.09 | 0.06 | 0.03 | 0.02 |  | 0.04 | 0.02 | 0.06 |      | 0.08 | 0.03 |      |
| P51660 | Peroxisomal multifunctional enzyme type 2                                                                  | 0.80 | 0.42 | 1.03 | 0.67 | 0.71 | 0.47 |  | 0.65 | 0.35 | 0.77 | 0.47 | 1.06 | 0.17 |      |
| P51863 | V-type proton ATPase subunit d 1                                                                           | 0.10 | 0.11 | 0.13 | 0.20 | 0.13 | 0.14 |  | 0.11 | 0.11 | 0.15 | 0.06 | 0.16 | 0.11 |      |
| P51881 | ADP/ATP translocase 2                                                                                      | 0.44 | 0.31 | 0.50 | 0.62 | 0.56 | 0.45 |  | 0.32 | 0.57 | 0.46 | 0.37 | 0.48 | 0.95 |      |
| P52431 | DNA polymerase delta catalytic subunit                                                                     |      | 0.04 |      |      |      | 0.01 |  |      |      |      |      |      | 0.01 |      |
| P52480 | Pyruvate kinase PKM                                                                                        | 0.94 | 1.04 | 0.88 | 1.16 | 2.17 | 0.82 |  | 1.35 | 1.84 | 1.51 | 1.05 | 1.33 | 2.36 |      |
| P52875 | Transmembrane protein 165                                                                                  |      |      |      |      |      |      |  |      |      |      |      |      | 0.01 |      |
| P53395 | Lipoamide acyltransferase component of branched-chain alpha-keto acid dehydrogenase complex, mitochondrial |      |      |      |      |      |      |  |      |      | 0.01 |      |      |      | 0.01 |
| P53986 | Monocarboxylate transporter 1                                                                              | 0.09 | 0.10 | 0.05 | 0.07 | 0.03 | 0.05 |  | 0.05 | 0.08 | 0.03 | 0.08 | 0.07 | 0.04 |      |
| P54071 | Isocitrate dehydrogenase [NADP], mitochondrial                                                             | 0.15 | 0.11 | 0.11 | 0.07 | 0.13 | 0.04 |  | 0.09 | 0.08 | 0.12 | 0.13 | 0.13 | 0.12 |      |
| P54103 | DnaJ homolog subfamily C member 2                                                                          |      |      | 0.02 |      |      |      |  |      |      | 0.03 |      |      |      |      |
| P54116 | Erythrocyte band 7 integral membrane protein                                                               | 0.26 | 0.29 | 0.38 | 0.47 | 0.37 | 0.23 |  | 0.25 | 0.32 | 0.28 | 0.24 | 0.45 | 0.24 |      |
| P54276 | DNA mismatch repair protein Msh6                                                                           |      | 0.06 | 0.02 | 0.01 | 0.03 | 0.02 |  |      |      | 0.04 | 0.11 |      |      |      |
| P54775 | 26S protease regulatory subunit 6B                                                                         | 0.07 | 0.07 | 0.06 | 0.04 | 0.03 | 0.02 |  | 0.03 | 0.02 | 0.05 |      | 0.04 | 0.03 |      |
| P54823 | Probable ATP-dependent RNA helicase DDX6                                                                   |      | 0.05 | 0.04 | 0.05 |      | 0.03 |  | 0.02 | 0.01 | 0.03 |      | 0.04 | 0.01 |      |
| P54923 | [Protein ADP-ribosylarginine] hydrolase                                                                    | 0.08 | 0.08 |      | 0.02 |      | 0.03 |  |      |      | 0.02 |      |      |      |      |
| P56399 | Ubiquitin carboxyl-terminal hydrolase 5                                                                    |      |      |      | 0.01 | 0.03 | 0.03 |  | 0.04 |      | 0.05 |      | 0.05 | 0.02 |      |
| P56477 | Interferon regulatory factor 5                                                                             |      |      | 0.02 |      |      |      |  | 0.01 |      |      |      | 0.03 |      |      |
| P56480 | ATP synthase subunit beta, mitochondrial                                                                   | 1.50 | 1.19 | 1.41 | 1.49 | 1.18 | 1.03 |  | 0.83 | 0.96 | 1.05 | 1.26 | 1.21 | 1.07 |      |
| P57746 | V-type proton ATPase subunit D                                                                             |      |      | 0.02 | 0.01 |      |      |  | 0.02 |      | 0.03 |      | 0.02 | 0.01 |      |
| P57759 | Endoplasmic reticulum resident protein 29                                                                  |      |      | 0.01 |      | 0.05 | 0.01 |  | 0.03 | 0.01 | 0.02 |      | 0.02 |      |      |
| P57784 | U2 small nuclear ribonucleoprotein A'                                                                      | 0.06 | 0.07 | 0.06 | 0.06 | 0.09 | 0.07 |  | 0.04 | 0.04 | 0.08 | 0.05 | 0.07 | 0.03 |      |

|        |                                                                  |      |      |      |      |      |      |      |      |      |      |      |      |
|--------|------------------------------------------------------------------|------|------|------|------|------|------|------|------|------|------|------|------|
| P58252 | Elongation factor 2                                              | 0.05 | 0.11 | 0.16 | 0.13 | 0.53 | 0.10 | 0.44 | 0.39 | 0.46 | 0.17 | 0.36 | 0.41 |
| P58389 | Serine/threonine-protein phosphatase 2A activator                |      |      |      |      |      |      |      |      | 0.02 |      | 0.02 | 0.01 |
| P58742 | Aladin                                                           |      | 0.03 | 0.02 | 0.02 |      |      |      |      |      |      |      |      |
| P59325 | Eukaryotic translation initiation factor 5                       |      |      | 0.02 |      |      |      |      |      |      |      |      | 0.01 |
| P59708 | Splicing factor 3B subunit 6                                     |      |      |      |      |      |      |      |      |      |      |      | 0.04 |
| P59999 | Actin-related protein 2/3 complex subunit 4                      |      |      | 0.03 | 0.02 | 0.08 | 0.01 | 0.04 | 0.06 |      |      | 0.04 | 0.12 |
| P60122 | RuvB-like 1                                                      | 0.15 | 0.14 | 0.14 | 0.12 | 0.16 | 0.05 | 0.09 | 0.10 | 0.13 | 0.10 | 0.12 | 0.11 |
| P60335 | Poly(rC)-binding protein 1                                       | 0.58 | 0.46 | 0.19 | 0.27 | 0.20 | 0.28 | 0.14 | 0.12 | 0.30 | 0.42 | 0.21 | 0.18 |
| P60766 | Cell division control protein 42 homolog                         | 0.05 | 0.03 | 0.08 | 0.09 | 0.18 | 0.07 | 0.08 | 0.07 |      | 0.05 | 0.08 | 0.08 |
| P60843 | Eukaryotic initiation factor 4A-I                                | 1.06 | 0.72 | 0.47 | 0.40 | 0.46 | 0.39 | 0.34 | 0.23 | 0.56 | 0.87 | 0.51 | 0.39 |
| P61022 | Calcineurin B homologous protein 1                               |      |      |      | 0.04 |      |      |      |      |      |      |      |      |
| P61082 | NEDD8-conjugating enzyme Ubc12                                   |      |      |      |      |      |      |      | 0.01 |      |      |      | 0.02 |
| P61089 | Ubiquitin-conjugating enzyme E2 N                                |      |      | 0.02 | 0.03 |      | 0.03 | 0.02 | 0.03 |      |      | 0.04 | 0.07 |
| P61161 | Actin-related protein 2                                          | 0.06 | 0.05 | 0.03 | 0.01 | 0.03 | 0.03 | 0.04 | 0.05 | 0.04 |      | 0.06 | 0.06 |
| P61164 | Alpha-centractin                                                 | 0.03 |      | 0.03 | 0.05 | 0.07 | 0.03 | 0.06 | 0.06 | 0.08 |      | 0.05 | 0.06 |
| P61211 | ADP-ribosylation factor-like protein 1                           |      |      |      |      |      |      |      |      |      |      |      | 0.03 |
| P61222 | ATP-binding cassette sub-family E member 1                       |      | 0.06 |      | 0.03 | 0.06 | 0.02 | 0.05 | 0.03 | 0.07 |      | 0.07 | 0.07 |
| P61226 | Ras-related protein Rap-2b                                       |      |      | 0.02 |      | 0.07 | 0.02 |      | 0.02 |      |      | 0.03 | 0.04 |
| P61255 | 60S ribosomal protein L26                                        | 0.17 | 0.07 | 0.16 | 0.17 | 0.19 | 0.09 | 0.09 | 0.12 |      | 0.11 | 0.16 | 0.23 |
| P61290 | Proteasome activator complex subunit 3                           |      | 0.03 | 0.02 | 0.02 | 0.02 | 0.01 | 0.01 | 0.01 | 0.03 |      | 0.03 | 0.02 |
| P61620 | Protein transport protein Sec61 subunit alpha isoform 1          | 0.06 | 0.05 | 0.05 | 0.05 | 0.03 | 0.04 | 0.03 | 0.02 | 0.02 |      | 0.03 | 0.04 |
| P61750 | ADP-ribosylation factor 4                                        | 0.15 | 0.08 | 0.09 | 0.15 | 0.15 | 0.10 | 0.05 | 0.05 |      | 0.11 | 0.10 | 0.17 |
| P61967 | AP-1 complex subunit sigma-1A                                    |      |      |      |      |      | 0.01 |      |      |      |      |      | 0.01 |
| P62137 | Serine/threonine-protein phosphatase PP1-alpha catalytic subunit |      | 0.07 | 0.05 | 0.06 | 0.06 | 0.03 | 0.03 | 0.02 | 0.07 | 0.05 | 0.06 | 0.09 |
| P62196 | 26S protease regulatory subunit 8                                | 0.27 | 0.21 | 0.14 | 0.13 | 0.07 | 0.10 | 0.07 | 0.03 | 0.08 | 0.18 | 0.13 | 0.06 |
| P62301 | 40S ribosomal protein S13                                        | 0.19 | 0.08 | 0.17 | 0.19 | 0.22 | 0.10 | 0.09 | 0.07 |      | 0.11 | 0.15 | 0.12 |
| P62320 | Small nuclear ribonucleoprotein Sm D3                            |      |      |      | 0.02 |      | 0.01 | 0.02 | 0.03 |      |      | 0.02 | 0.03 |
| P62334 | 26S protease regulatory subunit 10B                              | 0.16 | 0.15 | 0.14 | 0.10 | 0.06 | 0.07 | 0.08 | 0.03 | 0.13 |      | 0.12 | 0.06 |
| P62340 | TATA box-binding protein-like protein 1                          |      |      |      |      |      |      |      |      |      |      |      | 0.01 |
| P62342 | Selenoprotein T                                                  |      |      |      |      |      |      |      |      |      |      |      | 0.01 |
| P62717 | 60S ribosomal protein L18a                                       | 0.11 | 0.03 | 0.04 | 0.09 | 0.07 | 0.03 | 0.02 | 0.06 |      | 0.06 | 0.04 | 0.18 |
| P62743 | AP-2 complex subunit sigma                                       |      |      |      |      |      |      |      |      |      |      |      | 0.02 |
| P62814 | V-type proton ATPase subunit B, brain isoform                    | 0.14 | 0.11 | 0.12 | 0.10 | 0.10 | 0.09 | 0.09 | 0.07 | 0.12 | 0.11 | 0.14 | 0.10 |
| P62827 | GTP-binding nuclear protein Ran                                  | 0.32 | 0.18 | 0.16 | 0.22 | 0.29 | 0.15 | 0.16 | 0.14 | 0.22 | 0.23 | 0.18 | 0.20 |
| P62830 | 60S ribosomal protein L23                                        |      |      |      | 0.16 |      | 0.11 | 0.07 | 0.07 |      |      | 0.09 | 0.17 |
| P62843 | 40S ribosomal protein S15                                        |      |      | 0.04 | 0.06 | 0.03 |      | 0.02 | 0.04 |      |      | 0.04 | 0.05 |
| P62852 | 40S ribosomal protein S25                                        |      |      | 0.09 | 0.10 | 0.14 | 0.06 | 0.08 | 0.07 |      | 0.05 | 0.11 | 0.05 |
| P62855 | 40S ribosomal protein S26                                        |      | 0.04 | 0.02 | 0.09 |      | 0.05 | 0.05 | 0.04 |      |      | 0.08 | 0.11 |
| P62889 | 60S ribosomal protein L30                                        |      |      |      | 0.17 |      | 0.12 | 0.09 | 0.20 |      |      | 0.09 | 0.29 |
| P62911 | 60S ribosomal protein L32                                        | 0.13 | 0.07 | 0.12 | 0.13 | 0.08 | 0.06 | 0.09 | 0.05 | 0.06 | 0.09 | 0.12 | 0.18 |
| P62918 | 60S ribosomal protein L8                                         | 0.17 | 0.14 | 0.14 | 0.14 | 0.20 | 0.10 | 0.08 | 0.14 | 0.13 | 0.17 | 0.15 | 0.26 |
| P62960 | Nuclease-sensitive element-binding protein 1                     |      | 0.09 |      |      |      | 0.01 |      |      |      |      |      |      |
| P62962 | Profilin-1                                                       |      |      |      |      |      |      |      | 0.10 |      |      |      | 0.18 |
| P63005 | Platelet-activating factor acetylhydrolase IB subunit alpha      |      |      |      |      |      |      |      |      |      |      |      | 0.01 |
| P63017 | Heat shock cognate 71 kDa protein                                | 0.79 | 0.47 | 0.34 | 0.35 | 0.47 | 0.26 | 0.38 | 0.40 | 0.25 | 0.50 | 0.47 | 0.33 |
| P63037 | DnaJ homolog subfamily A member 1                                | 0.04 | 0.05 | 0.04 | 0.01 |      | 0.03 |      |      | 0.02 |      | 0.02 | 0.01 |
| P63038 | 60 kDa heat shock protein, mitochondrial                         | 0.48 | 0.59 | 0.73 | 0.61 | 0.55 | 0.48 | 0.57 | 0.41 | 0.59 | 0.56 | 0.75 | 0.44 |
| P63101 | 14-3-3 protein zeta/delta                                        | 0.05 | 0.04 | 0.04 | 0.05 | 0.09 | 0.03 | 0.10 | 0.12 | 0.08 |      | 0.09 | 0.17 |
| P63242 | Eukaryotic translation initiation factor 5A-1                    |      |      |      |      |      |      |      | 0.02 |      |      |      | 0.01 |

|        |                                                                            |      |      |      |      |      |      |      |      |      |      |      |      |
|--------|----------------------------------------------------------------------------|------|------|------|------|------|------|------|------|------|------|------|------|
| P63330 | Serine/threonine-protein phosphatase 2A catalytic subunit alpha isoform    | 0.07 | 0.07 | 0.03 | 0.03 | 0.04 | 0.01 | 0.02 | 0.06 | 0.04 | 0.07 | 0.04 | 0.12 |
| P67778 | Prohibitin                                                                 | 0.35 | 0.28 | 0.34 | 0.37 | 0.50 | 0.31 | 0.25 | 0.26 | 0.43 | 0.27 | 0.42 | 0.44 |
| P68040 | Guanine nucleotide-binding protein subunit beta-2-like 1                   | 0.45 | 0.40 | 0.42 | 0.21 | 0.25 | 0.14 | 0.15 | 0.13 | 0.25 | 0.38 | 0.35 | 0.34 |
| P68181 | cAMP-dependent protein kinase catalytic subunit beta                       |      |      | 0.03 |      |      |      | 0.02 |      | 0.02 |      | 0.04 | 0.01 |
| P68510 | 14-3-3 protein eta                                                         |      |      | 0.05 | 0.04 | 0.08 | 0.03 | 0.09 | 0.10 | 0.06 |      | 0.08 | 0.12 |
| P70122 | Ribosome maturation protein SBDS                                           |      |      |      |      |      |      |      |      | 0.02 |      | 0.02 | 0.01 |
| P70168 | Importin subunit beta-1                                                    | 0.16 | 0.13 | 0.20 | 0.14 | 0.15 | 0.07 | 0.14 | 0.18 | 0.21 | 0.22 | 0.19 | 0.17 |
| P70245 | 3-beta-hydroxysteroid-Delta(8),Delta(7)-isomerase                          |      |      |      |      |      |      |      |      |      |      |      | 0.01 |
| P70288 | Histone deacetylase 2                                                      |      | 0.04 |      |      | 0.02 | 0.01 |      |      | 0.02 |      |      | 0.02 |
| P70290 | 55 kDa erythrocyte membrane protein                                        |      |      |      |      |      |      |      |      | 0.01 |      |      |      |
| P70318 | Nucleolysin TIAR                                                           |      |      | 0.04 | 0.02 |      | 0.01 |      |      | 0.02 |      | 0.02 |      |
| P70333 | Heterogeneous nuclear ribonucleoprotein H2                                 | 0.20 | 0.15 | 0.08 | 0.09 | 0.08 | 0.08 | 0.02 | 0.04 | 0.09 | 0.14 | 0.08 | 0.03 |
| P70349 | Histidine triad nucleotide-binding protein 1                               |      |      |      |      |      |      |      | 0.04 |      |      |      | 0.04 |
| P70362 | Ubiquitin fusion degradation protein 1 homolog                             |      | 0.04 |      | 0.02 |      | 0.02 |      |      | 0.01 |      |      |      |
| P70372 | ELAV-like protein 1                                                        | 0.30 | 0.28 | 0.11 | 0.11 | 0.14 | 0.13 | 0.06 | 0.06 | 0.15 | 0.21 | 0.10 | 0.07 |
| P70398 | Probable ubiquitin carboxyl-terminal hydrolase FAF-X                       |      | 0.03 |      | 0.01 |      |      |      |      |      |      |      |      |
| P70404 | Isocitrate dehydrogenase [NAD] subunit gamma 1, mitochondrial              |      | 0.05 | 0.02 | 0.03 |      | 0.02 |      |      | 0.01 |      |      |      |
| P70452 | Syntaxin-4                                                                 |      |      | 0.02 |      |      |      |      |      |      |      |      |      |
| P70460 | Vasodilator-stimulated phosphoprotein                                      |      | 0.04 | 0.03 | 0.01 |      |      |      |      |      |      |      | 0.02 |
| P70670 | Nascent polypeptide-associated complex subunit alpha, muscle-specific form |      | 0.04 | 0.04 | 0.10 | 0.08 | 0.04 | 0.03 | 0.06 | 0.04 |      | 0.07 | 0.05 |
| P70696 | Histone H2B type 1-A                                                       |      |      | 0.06 | 0.15 | 0.08 | 0.06 | 0.09 | 0.13 | 0.03 |      | 0.11 | 0.15 |
| P70698 | CTP synthase 1                                                             |      | 0.03 | 0.05 | 0.04 |      | 0.02 |      |      | 0.03 | 0.05 | 0.02 | 0.02 |
| P80315 | T-complex protein 1 subunit delta                                          | 0.26 | 0.34 | 0.31 | 0.24 | 0.37 | 0.19 | 0.33 | 0.23 | 0.38 | 0.40 | 0.41 | 0.35 |
| P80316 | T-complex protein 1 subunit epsilon                                        | 0.23 | 0.29 | 0.24 | 0.14 | 0.32 | 0.15 | 0.29 | 0.20 | 0.34 | 0.30 | 0.36 | 0.29 |
| P84084 | ADP-ribosylation factor 5                                                  | 0.20 | 0.08 | 0.12 | 0.16 | 0.20 | 0.13 | 0.08 | 0.07 |      | 0.14 | 0.10 | 0.19 |
| P84091 | AP-2 complex subunit mu                                                    |      |      |      |      |      |      |      |      |      |      |      | 0.01 |
| P97287 | Induced myeloid leukemia cell differentiation protein Mcl-1 homolog        |      | 0.03 |      |      |      | 0.01 |      |      |      |      |      |      |
| P97351 | 40S ribosomal protein S3a                                                  | 0.41 | 0.33 | 0.37 | 0.42 | 0.41 | 0.32 | 0.32 | 0.26 | 0.43 | 0.32 | 0.39 | 0.40 |
| P97363 | Serine palmitoyltransferase 2                                              |      | 0.03 | 0.03 | 0.02 |      |      |      |      |      |      |      |      |
| P97370 | Sodium/potassium-transporting ATPase subunit beta-3                        | 0.20 | 0.19 | 0.16 | 0.14 | 0.10 | 0.09 | 0.11 | 0.08 | 0.13 | 0.18 | 0.16 | 0.07 |
| P97371 | Proteasome activator complex subunit 1                                     |      |      |      |      |      |      |      |      |      |      | 0.02 |      |
| P97376 | Protein FRG1                                                               |      | 0.04 |      |      |      | 0.02 |      |      |      |      |      |      |
| P97377 | Cyclin-dependent kinase 2                                                  |      |      | 0.04 | 0.02 | 0.02 | 0.03 |      | 0.02 | 0.02 |      | 0.02 | 0.03 |
| P97384 | Annexin A11                                                                |      | 0.04 | 0.04 |      |      | 0.01 | 0.02 | 0.01 | 0.02 |      | 0.02 |      |
| P97429 | Annexin A4                                                                 |      | 0.05 | 0.12 | 0.06 | 0.11 | 0.07 | 0.04 | 0.03 | 0.17 |      | 0.12 | 0.04 |
| P97449 | Aminopeptidase N                                                           |      |      | 0.08 | 0.02 | 0.03 |      | 0.06 | 0.01 | 0.08 |      | 0.10 |      |
| P97807 | Fumarate hydratase, mitochondrial                                          | 0.19 | 0.18 | 0.22 | 0.29 | 0.14 | 0.21 | 0.10 | 0.07 | 0.21 | 0.19 | 0.19 | 0.12 |
| P97930 | Thymidylate kinase                                                         |      |      |      | 0.02 | 0.02 |      |      |      |      |      |      | 0.01 |
| P98078 | Disabled homolog 2                                                         |      |      | 0.06 | 0.06 |      |      | 0.03 | 0.01 |      |      | 0.04 | 0.04 |
| P99024 | Tubulin beta-5 chain                                                       | 1.44 | 1.04 | 0.96 | 1.09 | 0.78 | 0.92 | 0.41 | 0.33 | 1.02 | 0.99 | 0.68 | 1.09 |
| P99026 | Proteasome subunit beta type-4                                             |      |      |      |      |      |      |      | 0.01 |      |      |      | 0.02 |
| P99027 | 60S acidic ribosomal protein P2                                            |      |      |      | 0.12 |      | 0.04 | 0.03 | 0.06 |      |      | 0.07 | 0.08 |
| P99029 | Peroxisome protein 5, mitochondrial                                        |      |      |      |      |      |      | 0.02 | 0.03 |      |      | 0.02 | 0.09 |
| Q00612 | Glucose-6-phosphate 1-dehydrogenase X                                      |      |      |      |      |      |      |      | 0.02 |      |      |      | 0.03 |
| Q00651 | Integrin alpha-4                                                           | 0.11 | 0.09 | 0.06 | 0.06 | 0.06 | 0.04 | 0.04 | 0.04 | 0.08 | 0.07 | 0.05 |      |
| Q00PI9 | Heterogeneous nuclear ribonucleoprotein U-like protein 2                   | 0.06 | 0.05 | 0.02 | 0.02 |      | 0.02 |      |      | 0.02 |      | 0.02 |      |

|        |                                                                                |      |      |      |      |      |      |      |      |      |      |      |      |
|--------|--------------------------------------------------------------------------------|------|------|------|------|------|------|------|------|------|------|------|------|
| Q01320 | DNA topoisomerase 2-alpha                                                      |      | 0.03 |      | 0.01 |      | 0.01 |      |      | 0.02 |      |      |      |
| Q01405 | Protein transport protein Sec23A                                               |      |      | 0.01 |      |      |      |      |      |      |      | 0.02 | 0.01 |
| Q01730 | Ras suppressor protein 1                                                       |      |      | 0.05 | 0.05 | 0.03 | 0.07 |      |      | 0.06 |      | 0.03 | 0.03 |
| Q01853 | Transitional endoplasmic reticulum ATPase                                      |      | 0.03 | 0.04 | 0.02 | 0.17 | 0.02 | 0.08 | 0.12 | 0.15 |      | 0.10 | 0.08 |
| Q02257 | Junction plakoglobin                                                           |      | 0.03 | 0.12 | 0.09 |      | 0.06 | 0.03 | 0.02 |      |      | 0.08 | 0.03 |
| Q03145 | Ephrin type-A receptor 2                                                       |      |      | 0.05 |      |      |      | 0.01 |      |      |      | 0.02 |      |
| Q03265 | ATP synthase subunit alpha, mitochondrial                                      | 0.91 | 0.82 | 1.13 | 1.18 | 0.87 | 0.78 | 0.51 | 0.67 | 0.84 | 0.85 | 0.87 | 0.98 |
| Q04447 | Creatine kinase B-type                                                         |      |      |      |      | 0.14 |      | 0.09 | 0.09 | 0.06 |      | 0.11 | 0.25 |
| Q04750 | DNA topoisomerase 1                                                            |      | 0.05 |      | 0.02 | 0.02 | 0.01 | 0.01 | 0.02 | 0.02 | 0.08 |      | 0.01 |
| Q05144 | Ras-related C3 botulinum toxin substrate 2                                     | 0.23 | 0.12 | 0.12 | 0.17 | 0.24 | 0.14 | 0.14 | 0.08 |      | 0.16 | 0.12 | 0.13 |
| Q05769 | Prostaglandin G/H synthase 2                                                   |      |      | 0.02 |      |      |      | 0.02 |      |      |      | 0.02 |      |
| Q059G7 | 28S ribosomal protein S21, mitochondrial                                       |      |      |      |      |      |      |      |      |      |      |      | 0.02 |
| Q059T9 | PRP4 pre-mRNA processing factor 4 homolog (Yeast)                              |      | 0.04 |      | 0.02 |      | 0.01 |      |      | 0.01 |      |      | 0.01 |
| Q059U9 | A kinase (PRKA) anchor protein 8                                               |      |      |      |      |      | 0.01 |      |      |      |      |      |      |
| Q05D44 | Eukaryotic translation initiation factor 5B                                    |      | 0.04 | 0.02 |      |      |      | 0.02 |      | 0.02 |      | 0.02 |      |
| Q06185 | ATP synthase subunit e, mitochondrial                                          |      |      |      |      |      |      |      | 0.04 |      |      |      | 0.05 |
| Q06EZ3 | O-acyltransferase                                                              |      |      | 0.02 | 0.02 |      |      |      |      |      |      |      | 0.01 |
| Q07076 | Annexin A7                                                                     | 0.08 | 0.08 | 0.17 | 0.15 | 0.03 | 0.06 | 0.11 | 0.07 | 0.07 |      | 0.20 | 0.10 |
| Q07417 | Short-chain specific acyl-CoA dehydrogenase, mitochondrial                     | 0.19 | 0.12 | 0.10 | 0.07 | 0.07 | 0.08 | 0.03 | 0.03 | 0.10 | 0.13 | 0.08 | 0.04 |
| Q08943 | FACT complex subunit SSRP1                                                     | 0.06 | 0.08 | 0.03 |      | 0.02 | 0.03 |      |      | 0.04 | 0.12 |      |      |
| Q0P635 | Colony stimulating factor 1 receptor                                           |      |      |      |      |      |      |      |      | 0.02 |      |      |      |
| Q0PD23 | RAB32, member RAS oncogene family                                              |      |      |      | 0.01 | 0.02 | 0.01 | 0.01 |      | 0.03 |      | 0.02 |      |
| Q0PD49 | RAB8B, member RAS oncogene family                                              | 0.12 | 0.07 | 0.07 | 0.08 | 0.15 | 0.09 | 0.07 | 0.07 | 0.12 |      | 0.10 | 0.12 |
| Q0PD56 | Rab5B                                                                          |      |      | 0.06 | 0.06 | 0.14 | 0.06 | 0.07 | 0.05 | 0.10 | 0.06 | 0.09 | 0.05 |
| Q0PD65 | RAB2, member RAS oncogene family                                               | 0.13 | 0.07 | 0.05 | 0.11 | 0.20 | 0.09 | 0.07 | 0.09 | 0.09 | 0.12 | 0.08 | 0.06 |
| Q0VE46 | Myadm protein                                                                  |      |      | 0.02 | 0.11 | 0.05 | 0.01 | 0.02 | 0.19 | 0.03 |      | 0.02 | 0.08 |
| Q0VGU0 | GTP-binding protein SAR1b                                                      |      |      | 0.05 | 0.06 | 0.10 | 0.04 | 0.04 | 0.03 | 0.06 | 0.05 | 0.06 | 0.06 |
| Q11011 | Puromycin-sensitive aminopeptidase                                             | 0.12 | 0.08 | 0.10 | 0.05 | 0.07 | 0.05 | 0.09 | 0.02 | 0.13 | 0.15 | 0.14 | 0.05 |
| Q149C8 | Hexokinase                                                                     |      |      | 0.02 | 0.03 | 0.03 | 0.02 | 0.02 | 0.04 | 0.04 |      | 0.03 | 0.04 |
| Q14AF6 | MCG4862                                                                        |      |      |      |      |      | 0.01 |      | 0.03 |      |      |      | 0.02 |
| Q14AI7 | COP9 (Constitutive photomorphogenic) homolog, subunit 4 (Arabidopsis thaliana) | 0.07 | 0.07 | 0.03 |      | 0.02 | 0.02 | 0.02 |      | 0.05 |      | 0.04 | 0.01 |
| Q14B21 | 39S ribosomal protein L9, mitochondrial                                        |      |      |      | 0.02 |      |      |      |      |      |      |      | 0.01 |
| Q14C24 | MCG14259, isoform CRA_a                                                        |      |      | 0.03 | 0.04 | 0.02 | 0.04 | 0.01 | 0.01 | 0.02 |      | 0.02 | 0.02 |
| Q14C26 | ER membrane protein complex subunit 7                                          |      |      |      |      |      |      |      | 0.01 |      |      |      | 0.01 |
| Q14C51 | Pentatricopeptide repeat domain-containing protein 3, mitochondrial            | 0.07 | 0.10 | 0.05 | 0.09 | 0.08 | 0.04 | 0.03 | 0.03 | 0.06 | 0.16 | 0.06 | 0.05 |
| Q14DR9 | ERO1-like beta (S. cerevisiae)                                                 |      |      | 0.02 | 0.01 |      |      |      |      |      |      | 0.02 |      |
| Q1HFZ0 | tRNA (cytosine(34)-C(5))-methyltransferase                                     | 0.17 | 0.12 | 0.07 | 0.09 | 0.04 | 0.08 | 0.03 | 0.02 | 0.07 | 0.24 | 0.06 | 0.04 |
| Q1HL32 | Structural maintenance of chromosomes protein                                  |      | 0.09 | 0.04 | 0.04 | 0.04 | 0.03 |      |      | 0.05 | 0.08 | 0.03 | 0.02 |
| Q1MWP9 | EH-domain containing 4                                                         | 0.16 | 0.11 | 0.11 | 0.11 | 0.11 | 0.13 | 0.04 | 0.04 | 0.13 | 0.09 | 0.09 | 0.09 |
| Q1W5W7 | Putative gag-pol protein                                                       |      |      | 0.02 |      |      |      |      |      |      |      |      |      |
| Q1WWK3 | Hist1h1b protein                                                               |      | 0.03 | 0.04 | 0.10 | 0.05 | 0.03 | 0.03 | 0.17 | 0.02 |      | 0.05 | 0.03 |
| Q20BD0 | Heterogeneous nuclear ribonucleoprotein A/B                                    | 0.12 | 0.11 | 0.09 | 0.12 | 0.14 | 0.09 | 0.06 | 0.12 | 0.12 | 0.09 | 0.09 | 0.12 |
| Q3KNM2 | E3 ubiquitin-protein ligase MARCH5                                             |      |      |      | 0.02 |      |      |      |      |      |      |      |      |
| Q3T9S3 | SET translocation                                                              |      |      |      |      | 0.07 | 0.01 |      |      | 0.03 |      |      |      |
| Q3TAQ9 | Protein Wdr36                                                                  |      | 0.03 |      | 0.02 |      | 0.01 |      |      | 0.01 | 0.06 |      |      |
| Q3TAV1 | Putative uncharacterized protein                                               |      | 0.04 | 0.05 |      | 0.03 | 0.02 | 0.02 | 0.01 | 0.03 | 0.04 | 0.04 | 0.01 |
| Q3TBT3 | Stimulator of interferon genes protein                                         |      |      |      | 0.02 |      |      |      |      |      |      |      |      |
| Q3TC14 | Putative uncharacterized protein                                               |      |      |      |      | 0.02 |      |      |      | 0.02 |      |      |      |
| Q3TC56 | Putative uncharacterized protein                                               |      |      |      |      |      | 0.01 |      |      |      |      |      |      |







|         |                                                                                               |      |      |      |      |      |      |      |      |      |      |      |      |
|---------|-----------------------------------------------------------------------------------------------|------|------|------|------|------|------|------|------|------|------|------|------|
| Q3UAT2  | Translocating chain-associated membrane protein                                               |      |      |      | 0.02 |      |      |      |      |      |      |      | 0.01 |
| Q3UB60  | Putative uncharacterized protein                                                              |      |      |      |      |      |      |      |      |      |      |      | 0.01 |
| Q3UB66  | Putative uncharacterized protein                                                              | 0.25 | 0.14 | 0.14 | 0.22 | 0.29 | 0.21 | 0.15 | 0.17 | 0.30 | 0.19 | 0.20 | 0.30 |
| Q3UBW8  | Putative uncharacterized protein                                                              |      |      |      |      |      |      | 0.03 | 0.01 |      |      | 0.02 | 0.01 |
| Q3UBX0  | Transmembrane protein 109                                                                     |      |      | 0.02 | 0.03 | 0.04 | 0.01 | 0.02 | 0.03 |      |      | 0.03 | 0.02 |
| Q3UBZ3  | Putative uncharacterized protein                                                              |      |      |      |      | 0.04 |      |      |      | 0.02 |      |      |      |
| Q3UC10  | DNA helicase                                                                                  | 0.13 | 0.10 | 0.03 | 0.03 | 0.03 | 0.06 |      |      | 0.07 | 0.16 | 0.02 | 0.01 |
| Q3UC76  | Putative uncharacterized protein                                                              |      |      |      |      |      |      |      | 0.02 |      |      |      | 0.02 |
| Q3UCJ0  | Tyrosine-protein phosphatase non-receptor type                                                | 0.42 | 0.37 | 0.28 | 0.36 | 0.18 | 0.22 | 0.10 | 0.11 | 0.27 | 0.36 | 0.17 | 0.25 |
| Q3UCL7  | Putative uncharacterized protein                                                              | 0.76 | 0.56 | 0.65 | 0.54 | 0.65 | 0.37 | 0.47 | 0.32 | 0.64 | 0.59 | 0.70 | 0.54 |
| Q3UD06  | ATP synthase subunit gamma                                                                    | 0.14 | 0.16 | 0.19 | 0.18 | 0.16 | 0.12 | 0.08 | 0.12 | 0.17 | 0.15 | 0.18 | 0.19 |
| Q3UDI8  | DNA helicase                                                                                  |      | 0.14 | 0.03 | 0.03 | 0.03 | 0.06 |      |      | 0.09 | 0.21 |      | 0.02 |
| Q3UDJ7  | Putative uncharacterized protein                                                              |      |      |      |      |      |      |      |      |      |      |      | 0.02 |
| Q3UDK3  | Putative uncharacterized protein                                                              |      | 0.03 |      | 0.02 | 0.02 | 0.02 |      |      | 0.01 |      |      |      |
| Q3UDM0  | MOB kinase activator 1B                                                                       |      |      |      | 0.02 |      | 0.02 | 0.01 |      | 0.02 |      | 0.02 | 0.01 |
| Q3UDS4  | Putative uncharacterized protein                                                              |      |      | 0.03 |      |      |      | 0.01 |      | 0.01 |      | 0.02 |      |
| Q3UDW8  | Heparan-alpha-glucosaminide N-acetyltransferase                                               |      |      |      |      |      |      |      | 0.01 |      |      |      | 0.01 |
| Q3UDZ1  | Ras homolog gene family, member G                                                             | 0.09 |      | 0.03 | 0.05 | 0.06 | 0.03 | 0.03 | 0.02 |      | 0.10 | 0.04 | 0.05 |
| Q3UE92  | X-prolyl aminopeptidase (Aminopeptidase P) 1, soluble, isoform CRA_b                          |      |      |      |      |      |      |      | 0.03 |      |      |      | 0.04 |
| Q3UF16  | Putative uncharacterized protein                                                              |      | 0.03 | 0.02 | 0.03 |      |      |      | 0.01 |      |      |      | 0.02 |
| Q3UFR4  | Amino acid transporter                                                                        | 0.12 | 0.10 | 0.20 | 0.15 | 0.13 | 0.04 | 0.23 | 0.20 | 0.12 | 0.17 | 0.24 | 0.07 |
| Q3UG80  | Putative uncharacterized protein                                                              |      |      |      |      |      |      |      |      |      |      |      | 0.01 |
| Q3UGB5  | DAZ associated protein 1, isoform CRA_b                                                       |      |      |      | 0.02 |      | 0.02 |      |      |      |      |      |      |
| Q3UGB8  | Putative uncharacterized protein                                                              |      |      | 0.01 | 0.02 |      | 0.01 |      | 0.01 |      |      |      | 0.03 |
| Q3UGC8  | Propionyl-CoA carboxylase alpha chain, mitochondrial                                          | 0.37 | 0.22 | 0.24 | 0.31 | 0.22 | 0.20 | 0.16 | 0.25 | 0.11 | 0.45 | 0.19 | 0.02 |
| Q3UGR5  | Haloacid dehalogenase-like hydrolase domain-containing protein 2                              |      |      |      |      |      |      |      |      | 0.01 |      |      |      |
| Q3UH59  | Myosin-10                                                                                     |      |      |      |      | 0.35 |      | 0.10 |      | 0.42 |      |      | 0.14 |
| Q3UHQ5  | Putative uncharacterized protein                                                              | 0.12 | 0.11 | 0.05 | 0.04 | 0.03 | 0.02 |      |      | 0.05 | 0.12 |      | 0.05 |
| Q3UHW5  | Putative uncharacterized protein                                                              | 0.13 | 0.07 | 0.06 | 0.08 | 0.16 | 0.08 | 0.07 | 0.07 | 0.12 |      | 0.09 | 0.12 |
| Q3UI84  | Replication factor C subunit 4                                                                | 0.03 | 0.05 |      |      |      | 0.02 |      |      | 0.02 |      |      |      |
| Q3UIA5  | Putative uncharacterized protein                                                              |      |      |      |      |      |      |      |      | 0.02 |      |      |      |
| Q3UIG0  | Eukaryotic translation initiation factor 3 subunit E                                          | 0.09 | 0.11 | 0.11 | 0.07 | 0.07 | 0.05 | 0.03 | 0.05 | 0.07 | 0.09 | 0.06 | 0.07 |
| Q3UIH7  | Putative uncharacterized protein                                                              |      |      | 0.01 |      |      |      |      |      |      |      |      |      |
| Q3UIJ2  | Putative uncharacterized protein                                                              | 0.12 | 0.11 | 0.06 | 0.06 | 0.02 | 0.05 | 0.04 | 0.03 | 0.06 |      | 0.04 | 0.02 |
| Q3UIT2  | COP9 (Constitutive photomorphogenic) homolog, subunit 6 (Arabidopsis thaliana), isoform CRA_b |      | 0.02 | 0.01 |      |      | 0.02 |      |      | 0.01 |      | 0.02 |      |
| Q3UIJ44 | Putative uncharacterized protein                                                              | 0.12 | 0.12 | 0.07 | 0.04 | 0.10 | 0.05 | 0.10 | 0.12 | 0.11 | 0.07 | 0.13 | 0.09 |
| Q3UJL7  | Putative uncharacterized protein                                                              |      |      |      |      | 0.05 |      |      | 0.03 | 0.02 |      | 0.02 | 0.01 |
| Q3UJM1  | Putative uncharacterized protein                                                              |      | 0.02 |      |      |      |      |      |      |      |      |      |      |
| Q3UJN1  | DNA helicase                                                                                  | 0.15 | 0.14 | 0.04 | 0.02 | 0.06 | 0.05 |      |      | 0.09 | 0.19 | 0.02 | 0.02 |
| Q3UJR3  | Putative uncharacterized protein                                                              |      | 0.05 |      |      |      |      |      |      |      |      |      |      |
| Q3UJV2  | Putative uncharacterized protein                                                              |      |      |      |      | 0.03 |      |      |      | 0.02 |      |      |      |
| Q3UJZ7  | Putative uncharacterized protein                                                              | 0.12 | 0.09 | 0.15 | 0.10 | 0.06 | 0.05 | 0.03 |      | 0.07 | 0.08 | 0.07 | 0.05 |
| Q3UK56  | Putative uncharacterized protein                                                              | 0.72 | 0.56 | 0.58 | 0.45 | 0.54 | 0.31 | 0.41 | 0.27 | 0.55 | 0.55 | 0.63 | 0.46 |
| Q3UK60  | Putative uncharacterized protein                                                              |      |      |      | 0.02 |      | 0.07 | 0.02 | 0.03 |      |      | 0.02 | 0.03 |
| Q3UK83  | Putative uncharacterized protein                                                              | 0.06 | 0.06 | 0.02 | 0.04 | 0.05 | 0.04 | 0.02 | 0.02 | 0.04 |      | 0.03 | 0.11 |
| Q3UKJ7  | WD40 repeat-containing protein SMU1                                                           |      |      |      |      |      |      |      |      |      |      |      | 0.01 |
| Q3UKS0  | Putative uncharacterized protein                                                              |      | 0.04 | 0.05 | 0.06 | 0.03 | 0.02 | 0.02 | 0.01 |      |      | 0.03 | 0.02 |
| Q3UKX8  | Putative uncharacterized protein                                                              |      |      | 0.02 | 0.02 |      | 0.01 |      |      | 0.04 |      |      | 0.02 |
| Q3UL32  | Putative uncharacterized protein                                                              |      | 0.06 | 0.03 | 0.02 |      | 0.03 |      |      | 0.02 |      | 0.02 | 0.01 |



|        |                                                                       |      |      |      |      |      |      |      |      |      |      |      |      |
|--------|-----------------------------------------------------------------------|------|------|------|------|------|------|------|------|------|------|------|------|
| Q3UL54 | Putative uncharacterized protein                                      |      | 0.06 |      | 0.02 |      | 0.01 |      |      |      |      |      |      |
| Q3ULD5 | Methylcrotonoyl-CoA carboxylase beta chain, mitochondrial             |      |      | 0.02 |      |      |      |      |      |      |      |      |      |
| Q3ULG4 | Putative uncharacterized protein                                      |      |      | 0.02 |      |      | 0.01 | 0.01 | 0.01 |      |      | 0.02 |      |
| Q3ULL5 | Eif2s2 protein                                                        | 0.09 | 0.09 | 0.05 | 0.07 | 0.06 | 0.04 | 0.04 | 0.03 | 0.06 |      | 0.05 | 0.07 |
| Q3ULN8 | Putative uncharacterized protein                                      |      |      | 0.02 |      |      |      |      |      |      |      | 0.02 |      |
| Q3ULS2 | Structural maintenance of chromosomes protein                         |      | 0.07 | 0.02 | 0.02 |      |      | 0.02 |      | 0.02 | 0.09 |      | 0.01 |
| Q3ULU3 | Branched-chain-amino-acid aminotransferase                            |      |      |      |      |      | 0.01 |      |      |      |      |      |      |
| Q3ULZ3 | Phosphoserine aminotransferase                                        | 0.11 | 0.12 | 0.06 | 0.10 | 0.19 | 0.13 | 0.11 | 0.10 | 0.34 | 0.13 | 0.15 | 0.11 |
| Q3UM23 | Putative uncharacterized protein                                      |      | 0.11 | 0.09 | 0.05 | 0.13 | 0.04 | 0.13 | 0.07 | 0.09 | 0.10 | 0.12 | 0.11 |
| Q3UMR5 | Calcium uniporter protein, mitochondrial                              |      |      |      |      |      |      |      |      |      |      |      | 0.01 |
| Q3UN35 | Beta-1,4 N-acetylgalactosaminyltransferase 1                          |      |      | 0.02 |      | 0.02 |      | 0.02 |      |      |      | 0.02 |      |
| Q3UNF2 | Serine/threonine-protein phosphatase                                  |      | 0.02 |      |      |      |      |      | 0.01 |      |      |      | 0.01 |
| Q3UNH3 | Putative uncharacterized protein                                      |      | 0.02 |      |      |      |      |      |      | 0.01 |      |      |      |
| Q3UPA3 | Putative uncharacterized protein                                      |      | 0.03 | 0.02 |      | 0.08 | 0.02 | 0.02 | 0.05 | 0.07 |      | 0.03 | 0.11 |
| Q3UPI8 | Transporter                                                           |      |      |      |      | 0.02 | 0.01 | 0.01 | 0.02 | 0.04 |      | 0.02 |      |
| Q3UPL0 | Protein transport protein Sec31A                                      | 0.09 | 0.10 | 0.06 | 0.04 | 0.03 | 0.04 | 0.01 | 0.01 | 0.08 | 0.10 | 0.04 | 0.02 |
| Q3UQM7 | Putative uncharacterized protein                                      |      | 0.03 | 0.02 | 0.02 |      | 0.03 | 0.02 | 0.02 | 0.02 |      | 0.03 |      |
| Q3UR33 | Putative uncharacterized protein                                      |      | 0.10 | 0.05 |      |      | 0.03 | 0.02 | 0.02 |      | 0.12 | 0.03 |      |
| Q3URF5 | Putative uncharacterized protein                                      |      | 0.05 | 0.04 | 0.03 | 0.07 | 0.04 | 0.03 | 0.02 | 0.07 |      | 0.04 | 0.01 |
| Q3URM4 | Putative uncharacterized protein                                      |      |      |      |      |      |      |      | 0.01 |      |      |      | 0.01 |
| Q3US15 | NAD(P) dependent steroid dehydrogenase-like                           | 0.04 | 0.04 | 0.03 | 0.03 | 0.03 | 0.01 | 0.02 |      | 0.02 |      | 0.02 | 0.02 |
| Q3UTB8 | GrpE protein homolog                                                  |      |      | 0.02 | 0.04 | 0.04 | 0.01 | 0.01 | 0.01 | 0.02 |      | 0.02 | 0.04 |
| Q3UUU2 | Far upstream element-binding protein 1                                |      |      | 0.02 | 0.01 |      |      | 0.01 |      | 0.02 |      | 0.02 |      |
| Q3UUX3 | Putative uncharacterized protein                                      |      |      | 0.02 | 0.02 | 0.02 | 0.01 |      | 0.01 |      |      |      | 0.01 |
| Q3UVI9 | Putative uncharacterized protein                                      |      | 0.10 |      | 0.02 |      | 0.01 |      |      | 0.01 | 0.11 |      | 0.01 |
| Q3UVK0 | Endoplasmic reticulum metalloproteinase 1                             |      |      |      |      |      |      | 0.01 | 0.02 |      |      | 0.02 |      |
| Q3UW40 | Putative uncharacterized protein                                      | 0.16 | 0.08 | 0.11 | 0.14 | 0.18 | 0.09 | 0.06 | 0.08 | 0.09 | 0.12 | 0.09 | 0.17 |
| Q3UWW9 | Putative uncharacterized protein                                      | 0.18 | 0.18 | 0.20 | 0.17 | 0.12 | 0.11 | 0.09 | 0.07 | 0.13 | 0.20 | 0.14 | 0.09 |
| Q3UXQ6 | 40S ribosomal protein S4                                              | 0.27 | 0.28 | 0.31 | 0.40 | 0.34 | 0.26 | 0.19 | 0.16 | 0.37 | 0.24 | 0.37 | 0.39 |
| Q3UY05 | Putative uncharacterized protein                                      |      |      | 0.04 | 0.06 | 0.03 | 0.03 | 0.03 | 0.01 | 0.02 |      | 0.03 | 0.03 |
| Q3UYK2 | Presenilin                                                            |      |      |      | 0.02 | 0.03 | 0.02 | 0.02 | 0.03 | 0.02 |      | 0.03 | 0.03 |
| Q3UYV9 | Nuclear cap-binding protein subunit 1                                 |      |      | 0.03 | 0.02 |      |      |      |      | 0.02 |      | 0.02 | 0.01 |
| Q3UZG3 | Putative uncharacterized protein                                      | 0.13 | 0.13 | 0.04 | 0.04 | 0.06 | 0.06 | 0.03 | 0.03 | 0.07 | 0.14 | 0.04 | 0.05 |
| Q3UZG4 | Aminoacyl tRNA synthase complex-interacting multifunctional protein 1 | 0.07 | 0.09 | 0.02 | 0.03 |      | 0.03 |      |      | 0.03 | 0.06 | 0.02 | 0.03 |
| Q3UZR5 | Calcium-transporting ATPase                                           |      |      |      | 0.02 |      |      |      |      |      |      |      |      |
| Q3UZR8 | Eukaryotic translation initiation factor 2B, subunit 1 (Alpha)        |      |      |      | 0.02 |      | 0.02 |      |      | 0.02 |      |      | 0.01 |
| Q3V0Z8 | Putative uncharacterized protein                                      | 0.26 | 0.25 | 0.23 | 0.20 | 0.16 | 0.20 | 0.06 | 0.08 | 0.18 | 0.32 | 0.14 | 0.12 |
| Q3V117 | ATP-citrate synthase                                                  |      |      |      |      | 0.02 |      | 0.03 | 0.03 | 0.01 |      | 0.03 | 0.03 |
| Q3V1M8 | Putative uncharacterized protein                                      | 0.15 | 0.14 | 0.10 | 0.08 |      | 0.04 | 0.02 | 0.02 | 0.02 | 0.23 | 0.06 | 0.05 |
| Q3V214 | DNA-directed RNA polymerases I, II, and III subunit RPABC1            | 0.05 | 0.04 | 0.01 | 0.04 | 0.03 | 0.03 |      |      | 0.02 |      |      | 0.02 |
| Q3V235 | Prohibitin 2                                                          | 0.38 | 0.30 | 0.50 | 0.40 | 0.49 | 0.24 | 0.33 | 0.33 | 0.33 | 0.33 | 0.50 | 0.46 |
| Q3V3R1 | Monofunctional C1-tetrahydrofolate synthase, mitochondrial            | 0.37 | 0.26 | 0.30 | 0.37 | 0.17 | 0.14 | 0.08 | 0.08 | 0.28 | 0.46 | 0.17 | 0.17 |
| Q497E9 | 40S ribosomal protein S8                                              | 0.36 | 0.30 | 0.28 | 0.34 | 0.30 | 0.20 | 0.19 | 0.19 | 0.29 | 0.32 | 0.28 | 0.54 |
| Q4FJL0 | RAB10, member RAS oncogene family                                     | 0.13 | 0.04 | 0.08 | 0.08 | 0.17 | 0.07 | 0.09 | 0.08 | 0.15 | 0.08 | 0.10 | 0.13 |
| Q4FJM5 | Ras homolog gene family, member B                                     |      |      |      |      |      |      | 0.02 |      |      |      |      | 0.01 |
| Q4FJP3 | Nras protein                                                          |      |      |      |      | 0.04 | 0.01 | 0.02 | 0.04 |      |      | 0.02 | 0.04 |
| Q4FJR4 | Pdk3 protein                                                          |      |      | 0.02 | 0.02 |      |      |      |      |      |      |      |      |



|        |                                                                         |      |      |      |      |      |      |      |      |      |      |      |      |
|--------|-------------------------------------------------------------------------|------|------|------|------|------|------|------|------|------|------|------|------|
| Q58E29 | Proteolipid protein 2                                                   |      |      | 0.05 | 0.03 | 0.02 |      | 0.03 | 0.03 |      |      | 0.04 | 0.02 |
| Q58E35 | 60S acidic ribosomal protein P1                                         |      |      | 0.05 | 0.05 |      | 0.02 | 0.04 | 0.05 |      |      | 0.03 | 0.07 |
| Q58EV4 | Proteasome subunit alpha type                                           |      |      |      |      | 0.03 | 0.01 | 0.01 |      | 0.02 |      | 0.02 | 0.02 |
| Q58EW0 | 60S ribosomal protein L18                                               | 0.47 | 0.31 | 0.34 | 0.45 | 0.43 | 0.25 | 0.30 | 0.27 | 0.34 | 0.34 | 0.35 | 0.73 |
| Q58NB6 | Dehydrogenase/reductase SDR family member 9                             |      |      | 0.02 |      |      |      | 0.01 | 0.01 |      |      | 0.02 |      |
| Q5BLJ9 | 60S ribosomal protein L27                                               | 0.10 | 0.03 | 0.08 | 0.09 | 0.11 | 0.05 | 0.04 | 0.08 | 0.07 | 0.08 | 0.07 | 0.11 |
| Q5BLK1 | 40S ribosomal protein S6                                                | 0.25 | 0.21 | 0.16 | 0.16 | 0.12 | 0.09 | 0.14 | 0.11 | 0.13 | 0.21 | 0.18 | 0.23 |
| Q5BLK2 | 40S ribosomal protein S20                                               |      |      |      | 0.05 |      | 0.02 | 0.05 | 0.06 |      |      | 0.06 | 0.07 |
| Q5CZY9 | Rps16 protein                                                           |      | 0.13 | 0.23 | 0.30 | 0.05 | 0.20 | 0.18 | 0.18 | 0.04 | 0.21 | 0.26 | 0.34 |
| Q5DTH1 | MKIAA4216 protein                                                       | 0.06 | 0.04 |      | 0.03 |      | 0.01 |      |      |      | 0.10 |      | 0.01 |
| Q5DTI2 | ATPase, Ca++ transporting, cardiac muscle, slow twitch 2, isoform CRA_b | 0.44 | 0.37 | 0.38 | 0.46 | 0.27 | 0.23 | 0.19 | 0.24 | 0.28 | 0.55 | 0.30 | 0.29 |
| Q5DTL8 | MKIAA4137 protein                                                       |      |      |      | 0.03 |      |      |      |      |      |      |      |      |
| Q5DTP7 | MKIAA4075 protein                                                       |      | 0.06 | 0.04 | 0.04 | 0.02 | 0.04 | 0.02 |      | 0.06 | 0.11 | 0.03 | 0.01 |
| Q5DTQ4 | MKIAA4062 protein                                                       |      |      | 0.02 | 0.04 |      |      |      |      |      |      | 0.02 | 0.02 |
| Q5DTS2 | MKIAA4026 protein                                                       |      |      | 0.05 | 0.02 |      |      | 0.01 |      |      |      | 0.05 | 0.02 |
| Q5EBQ6 | 60S ribosomal protein L9                                                | 0.13 | 0.12 | 0.09 | 0.13 | 0.17 | 0.08 | 0.06 | 0.07 | 0.11 | 0.08 | 0.11 | 0.21 |
| Q5FW97 | Alpha-enolase                                                           | 0.67 | 0.75 | 0.45 | 0.44 | 1.46 | 0.36 | 0.69 | 1.14 | 0.88 | 0.62 | 0.81 | 1.51 |
| Q5FWB6 | 60S acidic ribosomal protein P0                                         | 0.38 | 0.32 | 0.29 | 0.36 | 0.44 | 0.25 | 0.26 | 0.33 | 0.32 | 0.30 | 0.32 | 0.60 |
| Q5H8C4 | Vacuolar protein sorting-associated protein 13A                         |      |      |      | 0.01 |      |      |      |      |      |      |      |      |
| Q5HZI6 | GDP-L-fucose synthase                                                   |      |      |      |      |      | 0.01 |      |      | 0.02 |      |      |      |
| Q5I0T8 | Ribosomal protein L19                                                   | 0.08 | 0.04 | 0.07 | 0.07 | 0.09 | 0.04 | 0.06 | 0.07 | 0.05 | 0.07 | 0.09 | 0.04 |
| Q5I0W0 | ATP synthase F(0) complex subunit B1, mitochondrial                     | 0.12 | 0.12 | 0.15 | 0.24 | 0.19 | 0.12 | 0.10 | 0.17 | 0.13 | 0.10 | 0.17 | 0.24 |
| Q5KTQ1 | MHC class I heavy chain H2-K                                            |      | 0.04 | 0.02 |      | 0.02 | 0.02 | 0.02 | 0.01 | 0.02 |      | 0.03 |      |
| Q5M9K5 | NADH dehydrogenase (Ubiquinone) 1 alpha subcomplex, 12                  |      |      | 0.01 |      |      |      |      |      |      |      |      | 0.01 |
| Q5M9K9 | 60S ribosomal protein L31                                               |      | 0.07 | 0.12 | 0.16 | 0.04 | 0.10 | 0.08 | 0.09 |      | 0.10 | 0.12 | 0.15 |
| Q5M9L1 | 60S ribosomal protein L36                                               |      |      |      | 0.05 |      | 0.03 | 0.04 | 0.02 |      |      | 0.03 | 0.02 |
| Q5M9M4 | 40S ribosomal protein S15a                                              |      |      |      | 0.09 |      | 0.07 | 0.07 | 0.07 |      |      | 0.10 | 0.16 |
| Q5M9M5 | 60S ribosomal protein L23a                                              | 0.17 | 0.08 | 0.08 | 0.13 | 0.12 | 0.06 | 0.05 | 0.10 |      | 0.11 | 0.07 | 0.14 |
| Q5M9P1 | 60S ribosomal protein L36a                                              |      |      | 0.04 | 0.03 |      |      | 0.01 | 0.03 |      |      | 0.03 | 0.05 |
| Q5M9P3 | Rps19 protein                                                           |      |      | 0.06 | 0.11 |      | 0.08 | 0.10 | 0.07 |      |      | 0.13 | 0.08 |
| Q5NBZ3 | Developmentally-regulated GTP-binding protein 1                         | 0.11 | 0.07 | 0.06 | 0.05 | 0.06 | 0.06 | 0.04 | 0.02 | 0.08 | 0.09 | 0.06 | 0.04 |
| Q5RJV5 | Polypyrimidine tract binding protein 1                                  | 0.19 | 0.22 | 0.13 | 0.19 | 0.10 | 0.14 | 0.04 | 0.06 | 0.13 | 0.21 | 0.08 | 0.10 |
| Q5RL20 | 39S ribosomal protein L43, mitochondrial                                |      |      |      | 0.01 |      |      |      | 0.01 |      |      |      | 0.02 |
| Q5RL55 | ATP-binding cassette, sub-family F (GCN20), member 1                    |      |      |      |      |      |      |      |      |      | 0.06 |      |      |
| Q5SQ20 | Pescadillo homolog                                                      |      |      | 0.01 |      |      | 0.01 |      |      | 0.01 |      |      | 0.01 |
| Q5SQB7 | MCG68069                                                                | 0.04 | 0.05 | 0.03 | 0.05 | 0.08 | 0.04 |      | 0.02 | 0.02 |      | 0.02 | 0.04 |
| Q5SS40 | 14-3-3 protein epsilon                                                  |      |      | 0.04 | 0.03 | 0.08 | 0.02 | 0.09 | 0.10 | 0.06 |      | 0.05 | 0.12 |
| Q5SSL4 | Active breakpoint cluster region-related protein                        | 0.05 | 0.04 |      |      |      | 0.02 |      |      | 0.01 | 0.08 |      |      |
| Q5SUC3 | Calnexin                                                                | 0.37 | 0.26 | 0.46 | 0.33 | 0.29 | 0.21 | 0.29 | 0.26 | 0.34 | 0.36 | 0.36 | 0.21 |
| Q5SUF2 | Luc7-like protein 3                                                     |      | 0.04 |      |      |      |      |      |      |      |      |      |      |
| Q5SUH6 | Clathrin interactor 1                                                   |      | 0.18 | 0.27 |      |      | 0.06 | 0.18 |      |      | 0.21 | 0.24 |      |
| Q5SUS9 | RNA-binding protein EWS                                                 |      | 0.03 |      |      |      |      |      |      |      |      |      |      |
| Q5SW19 | Clustered mitochondria protein homolog                                  |      |      |      |      |      |      |      |      |      |      |      | 0.01 |
| Q5SWD9 | Pre-rRNA-processing protein TSR1 homolog                                |      |      |      | 0.02 |      |      |      |      |      |      |      | 0.01 |
| Q5SWR1 | AP complex subunit beta                                                 | 0.10 | 0.14 | 0.12 | 0.09 | 0.10 | 0.07 | 0.07 | 0.06 | 0.20 | 0.27 | 0.13 | 0.07 |
| Q5SWU9 | Acetyl-CoA carboxylase 1                                                | 0.15 | 0.09 | 0.06 | 0.10 | 0.03 | 0.07 | 0.01 |      | 0.06 | 0.12 | 0.05 | 0.02 |
| Q5SX53 | Mitochondrial 2-oxoglutarate/malate carrier protein                     | 0.11 | 0.12 | 0.08 | 0.13 | 0.12 | 0.08 | 0.08 | 0.08 | 0.10 | 0.13 | 0.10 | 0.07 |
| Q5SZA3 | Histone H1.2                                                            | 0.17 | 0.14 | 0.14 | 0.26 | 0.24 | 0.11 | 0.11 | 0.33 | 0.12 | 0.15 | 0.16 | 0.13 |
| Q5XJF6 | Ribosomal protein                                                       |      | 0.10 | 0.05 | 0.13 | 0.17 | 0.06 | 0.05 | 0.12 | 0.10 | 0.10 | 0.07 | 0.12 |
| Q5XJY5 | Coatomer subunit delta                                                  |      |      | 0.04 | 0.06 | 0.02 | 0.04 | 0.01 | 0.01 | 0.04 |      | 0.03 | 0.05 |

|        |                                                                             |      |      |      |      |      |      |      |      |      |      |      |      |
|--------|-----------------------------------------------------------------------------|------|------|------|------|------|------|------|------|------|------|------|------|
| Q5XKN4 | Protein jagunal homolog 1                                                   |      |      |      |      |      |      |      |      |      |      |      | 0.01 |
| Q5XW49 | Tapasin                                                                     |      |      | 0.05 | 0.04 | 0.03 | 0.03 | 0.02 | 0.02 | 0.03 |      | 0.04 |      |
| Q60597 | 2-oxoglutarate dehydrogenase, mitochondrial                                 |      |      | 0.02 | 0.02 | 0.05 |      | 0.02 | 0.01 | 0.07 |      | 0.03 | 0.04 |
| Q60668 | Heterogeneous nuclear ribonucleoprotein D0                                  | 0.09 | 0.06 | 0.06 | 0.06 | 0.07 | 0.06 | 0.03 | 0.06 | 0.08 | 0.05 | 0.06 | 0.05 |
| Q60692 | Proteasome subunit beta type-6                                              |      |      |      |      | 0.03 |      | 0.01 | 0.01 | 0.02 |      | 0.02 | 0.02 |
| Q60749 | KH domain-containing, RNA-binding, signal transduction-associated protein 1 | 0.05 | 0.04 | 0.10 | 0.06 | 0.03 | 0.06 | 0.02 | 0.02 | 0.06 |      | 0.08 |      |
| Q60766 | Immunity-related GTPase family M protein 1                                  |      |      |      |      |      | 0.01 |      |      |      |      |      |      |
| Q60865 | Caprin-1                                                                    |      |      |      |      |      |      | 0.01 | 0.01 |      |      |      | 0.02 |
| Q60875 | Rho guanine nucleotide exchange factor 2                                    | 0.05 | 0.05 | 0.03 | 0.03 | 0.03 | 0.02 | 0.02 | 0.01 | 0.03 | 0.06 | 0.02 | 0.03 |
| Q60930 | Voltage-dependent anion-selective channel protein 2                         | 0.36 | 0.34 | 0.22 | 0.27 | 0.47 | 0.21 | 0.22 | 0.19 | 0.46 | 0.36 | 0.30 | 0.20 |
| Q60932 | Voltage-dependent anion-selective channel protein 1                         | 0.30 | 0.33 | 0.21 | 0.16 | 0.28 | 0.13 | 0.14 | 0.15 | 0.27 | 0.25 | 0.27 | 0.11 |
| Q61033 | Lamina-associated polypeptide 2, isoforms alpha/zeta                        |      | 0.06 |      |      |      |      |      |      |      | 0.10 |      |      |
| Q61074 | Protein phosphatase 1G                                                      |      |      |      |      |      | 0.02 |      |      |      |      | 0.02 | 0.02 |
| Q61081 | Hsp90 co-chaperone Cdc37                                                    | 0.06 | 0.05 | 0.05 | 0.02 | 0.02 | 0.02 | 0.03 | 0.02 | 0.02 |      | 0.05 | 0.03 |
| Q61102 | ATP-binding cassette sub-family B member 7, mitochondrial                   |      |      |      | 0.02 |      |      |      |      | 0.01 |      |      | 0.01 |
| Q61171 | Peroxiredoxin-2                                                             |      |      | 0.02 | 0.05 | 0.11 | 0.02 | 0.04 | 0.06 |      |      | 0.04 | 0.07 |
| Q61213 | Gag                                                                         |      |      | 0.06 |      |      |      |      |      |      |      | 0.02 | 0.01 |
| Q61316 | Heat shock 70 kDa protein 4                                                 | 0.12 | 0.08 | 0.09 | 0.10 | 0.09 | 0.08 | 0.06 | 0.17 | 0.16 | 0.07 | 0.12 | 0.19 |
| Q61425 | Hydroxyacyl-coenzyme A dehydrogenase, mitochondrial                         |      |      |      |      | 0.03 |      |      | 0.02 |      |      |      | 0.01 |
| Q61543 | Golgi apparatus protein 1                                                   |      |      | 0.03 |      |      | 0.01 | 0.02 | 0.01 | 0.01 |      | 0.04 |      |
| Q61655 | ATP-dependent RNA helicase DDX19A                                           |      | 0.04 |      |      |      | 0.01 |      |      |      |      |      | 0.02 |
| Q61699 | Heat shock protein 105 kDa                                                  | 0.21 | 0.16 | 0.17 | 0.16 | 0.06 | 0.12 | 0.04 | 0.04 | 0.14 | 0.33 | 0.14 | 0.08 |
| Q61733 | 28S ribosomal protein S31, mitochondrial                                    |      | 0.02 |      | 0.01 |      |      |      |      |      |      |      |      |
| Q61753 | D-3-phosphoglycerate dehydrogenase                                          | 0.61 | 0.51 | 0.45 | 0.40 | 0.38 | 0.37 | 0.28 | 0.16 | 0.56 | 0.58 | 0.46 | 0.28 |
| Q61768 | Kinesin-1 heavy chain                                                       | 0.11 | 0.12 | 0.16 | 0.16 | 0.07 | 0.09 | 0.08 | 0.01 | 0.15 | 0.38 | 0.13 | 0.02 |
| Q61941 | NAD(P) transhydrogenase, mitochondrial                                      |      | 0.04 | 0.04 | 0.04 | 0.02 | 0.03 | 0.02 |      | 0.03 | 0.06 | 0.03 |      |
| Q61990 | Poly(rC)-binding protein 2                                                  | 0.39 | 0.32 | 0.16 | 0.22 | 0.17 | 0.20 | 0.10 | 0.07 | 0.22 | 0.28 | 0.14 | 0.10 |
| Q62087 | Serum paraoxonase/lactonase 3                                               |      |      | 0.03 | 0.02 |      | 0.01 | 0.03 | 0.01 | 0.01 |      | 0.05 |      |
| Q62159 | Rho-related GTP-binding protein RhoC                                        |      |      | 0.05 | 0.05 | 0.15 | 0.05 | 0.09 | 0.06 | 0.07 | 0.05 | 0.07 | 0.06 |
| Q62189 | U1 small nuclear ribonucleoprotein A                                        |      |      | 0.02 |      |      |      |      |      |      |      | 0.03 |      |
| Q62318 | Transcription intermediary factor 1-beta                                    | 0.24 | 0.21 | 0.12 | 0.09 | 0.03 | 0.12 | 0.02 | 0.01 | 0.08 | 0.34 | 0.06 | 0.03 |
| Q62348 | Translin                                                                    |      |      |      |      |      |      |      | 0.01 |      |      |      | 0.01 |
| Q62351 | Transferrin receptor protein 1                                              | 0.29 | 0.27 | 0.21 | 0.23 | 0.15 | 0.14 | 0.19 | 0.17 | 0.13 | 0.33 | 0.23 | 0.15 |
| Q62383 | Transcription elongation factor SPT6                                        |      |      |      |      |      |      |      |      | 0.01 |      |      |      |
| Q63829 | COMM domain-containing protein 3                                            |      |      |      |      | 0.03 | 0.02 |      |      |      |      |      | 0.02 |
| Q64012 | RNA-binding protein Raly                                                    |      | 0.03 | 0.03 | 0.03 | 0.09 | 0.03 | 0.03 | 0.03 | 0.05 |      | 0.03 | 0.02 |
| Q642K0 | MCG140959, isoform CRA_a                                                    |      |      |      | 0.04 | 0.02 | 0.03 | 0.11 | 0.08 |      |      | 0.04 | 0.26 |
| Q642L7 | MCG13441                                                                    | 0.20 | 0.23 | 0.16 | 0.24 | 0.32 | 0.10 | 0.22 | 0.18 | 0.16 | 0.26 | 0.22 | 0.15 |
| Q64310 | Surfeit locus protein 4                                                     |      |      | 0.03 | 0.08 | 0.03 | 0.02 | 0.03 | 0.02 | 0.02 |      | 0.03 | 0.10 |
| Q64511 | DNA topoisomerase 2-beta                                                    |      |      | 0.03 | 0.03 | 0.02 | 0.01 |      |      |      | 0.03 |      |      |
| Q64514 | Tripeptidyl-peptidase 2                                                     |      | 0.06 | 0.02 | 0.01 | 0.03 | 0.02 | 0.04 | 0.02 | 0.07 | 0.11 | 0.05 | 0.05 |
| Q64516 | Glycerol kinase                                                             |      |      | 0.02 |      |      |      |      |      |      |      | 0.03 |      |
| Q64518 | Sarcoplasmic/endoplasmic reticulum calcium ATPase 3                         | 0.11 | 0.08 | 0.08 | 0.09 | 0.03 | 0.04 | 0.03 | 0.04 | 0.04 | 0.15 | 0.06 | 0.05 |
| Q64521 | Glycerol-3-phosphate dehydrogenase, mitochondrial                           |      |      | 0.03 | 0.02 |      |      | 0.01 | 0.02 |      |      | 0.03 | 0.02 |
| Q64522 | Histone H2A type 2-B                                                        |      |      | 0.03 | 0.14 | 0.06 | 0.05 | 0.09 | 0.12 | 0.01 |      | 0.09 | 0.10 |
| Q64737 | Trifunctional purine biosynthetic protein adenosine-3                       | 0.24 | 0.22 | 0.05 | 0.08 | 0.03 | 0.10 | 0.02 |      | 0.09 | 0.35 | 0.05 | 0.04 |
| Q68FH4 | N-acetylgalactosamine kinase                                                |      |      |      |      |      |      |      |      | 0.01 |      |      |      |
| Q69Z43 | MKIAA1995 protein                                                           |      |      |      | 0.02 |      |      |      |      | 0.02 |      |      |      |
| Q69ZN1 | MKIAA1252 protein                                                           | 0.09 | 0.09 | 0.07 | 0.04 | 0.02 | 0.03 | 0.02 | 0.02 | 0.04 |      | 0.05 | 0.04 |

|        |                                                                                  |      |      |      |      |      |      |      |      |      |      |      |      |      |
|--------|----------------------------------------------------------------------------------|------|------|------|------|------|------|------|------|------|------|------|------|------|
| Q69ZV4 | MKIAA0923 protein                                                                | 0.15 | 0.05 | 0.10 | 0.10 | 0.03 | 0.07 | 0.04 | 0.06 | 0.03 | 0.07 | 0.03 | 0.05 |      |
| Q69ZW4 | MKIAA0899 protein                                                                |      | 0.05 | 0.04 | 0.05 | 0.06 | 0.03 | 0.03 | 0.02 | 0.08 | 0.08 | 0.07 | 0.05 |      |
| Q69ZX3 | MKIAA0866 protein                                                                |      | 0.16 | 0.03 | 0.02 | 0.53 | 0.01 | 0.17 | 0.03 | 0.57 |      | 0.03 | 0.20 |      |
| Q6A028 | Switch-associated protein 70                                                     |      |      | 0.03 |      |      |      |      |      | 0.02 |      | 0.02 |      |      |
| Q6A0A2 | La-related protein 4B                                                            |      | 0.03 |      |      |      |      |      |      |      | 0.06 |      |      |      |
| Q6A0A9 | Constitutive coactivator of PPAR-gamma-like protein 1                            |      | 0.04 |      |      |      |      |      |      |      |      |      |      |      |
| Q6A0C7 | MKIAA0118 protein                                                                |      |      | 0.05 | 0.04 | 0.02 | 0.03 | 0.04 |      |      | 0.02 |      | 0.04 | 0.03 |
| Q6A0D1 | ER membrane protein complex subunit 2                                            | 0.14 | 0.12 | 0.14 | 0.12 | 0.10 | 0.07 | 0.06 | 0.10 | 0.07 | 0.09 | 0.14 | 0.03 |      |
| Q6A0E3 | MKIAA0031 protein                                                                |      | 0.04 | 0.02 |      | 0.05 | 0.02 | 0.04 | 0.02 | 0.05 | 0.07 | 0.04 | 0.02 |      |
| Q6DFW4 | Nucleolar protein 58                                                             |      | 0.05 | 0.08 | 0.09 | 0.02 | 0.03 |      | 0.02 | 0.02 |      | 0.02 | 0.01 |      |
| Q6DI95 | Transportin 3                                                                    |      |      |      |      |      |      |      |      |      |      |      | 0.01 |      |
| Q6GQT9 | Nodal modulator 1                                                                | 0.07 | 0.08 | 0.13 | 0.14 | 0.07 | 0.07 | 0.09 | 0.08 | 0.08 | 0.13 | 0.13 | 0.05 |      |
| Q6GV12 | 3-ketodihydrospingosine reductase                                                |      |      |      |      |      |      |      |      | 0.02 |      | 0.02 |      |      |
| Q6IFZ8 | MCG1050941                                                                       | 0.16 |      | 0.28 | 0.18 | 0.14 | 0.14 | 0.09 | 0.07 | 0.17 | 0.17 | 0.18 | 0.07 |      |
| Q6KCD5 | Nipped-B-like protein                                                            |      | 0.04 | 0.05 | 0.08 | 0.05 | 0.04 | 0.05 | 0.05 | 0.04 |      | 0.07 | 0.02 |      |
| Q6NS46 | Protein RRP5 homolog                                                             |      | 0.05 | 0.02 | 0.02 |      | 0.02 |      |      |      |      |      |      |      |
| Q6NSU0 | Fam3c protein                                                                    |      |      | 0.02 | 0.02 | 0.02 | 0.01 | 0.02 | 0.01 |      |      | 0.02 |      |      |
| Q6NWW9 | Fibronectin type III domain-containing protein 3B                                |      |      | 0.02 | 0.01 |      |      |      |      |      |      |      |      |      |
| Q6P069 | Sorcin                                                                           |      |      |      |      |      |      |      | 0.01 |      |      |      | 0.01 |      |
| Q6P3A8 | 2-oxoisovalerate dehydrogenase subunit beta, mitochondrial                       |      |      |      | 0.01 |      |      |      |      |      |      |      | 0.01 |      |
| Q6P4T2 | U5 small nuclear ribonucleoprotein 200 kDa helicase                              |      | 0.14 | 0.08 | 0.10 | 0.14 | 0.09 | 0.05 | 0.05 | 0.17 | 0.11 | 0.07 | 0.07 |      |
| Q6P5B0 | RRP12-like protein                                                               |      | 0.04 | 0.02 |      |      |      |      |      | 0.02 | 0.09 |      |      |      |
| Q6P5D8 | Structural maintenance of chromosomes flexible hinge domain-containing protein 1 |      |      |      |      |      |      |      |      | 0.01 | 0.05 |      |      |      |
| Q6P5E4 | UDP-glucose:glycoprotein glucosyltransferase 1                                   | 0.06 | 0.06 | 0.07 | 0.08 | 0.02 | 0.02 | 0.03 | 0.03 | 0.05 | 0.10 | 0.05 | 0.02 |      |
| Q6P5F9 | Exportin-1                                                                       | 0.16 | 0.21 | 0.08 | 0.09 | 0.07 | 0.07 | 0.01 | 0.04 | 0.11 | 0.17 | 0.05 | 0.09 |      |
| Q6P9Q6 | FK506-binding protein 15                                                         |      | 0.03 |      |      |      |      |      |      |      | 0.05 |      |      |      |
| Q6P9R2 | Serine/threonine-protein kinaseR1                                                |      |      | 0.06 | 0.04 |      | 0.02 |      |      | 0.02 |      | 0.03 | 0.02 |      |
| Q6PB66 | Leucine-rich PPR motif-containing protein, mitochondrial                         | 0.39 | 0.38 | 0.33 | 0.42 | 0.29 | 0.22 | 0.06 | 0.08 | 0.40 | 0.56 | 0.17 | 0.13 |      |
| Q6PCP0 | DEAD (Asp-Glu-Ala-Asp) box polypeptide 21                                        | 0.39 | 0.34 | 0.18 | 0.17 | 0.11 | 0.16 | 0.03 | 0.04 | 0.16 | 0.43 | 0.09 | 0.08 |      |
| Q6PDG5 | SWI/SNF complex subunit SMARCC2                                                  |      |      |      |      |      |      |      |      | 0.01 |      |      |      |      |
| Q6PDI5 | Proteasome-associated protein ECM29 homolog                                      | 0.09 | 0.10 | 0.07 | 0.06 | 0.02 | 0.03 | 0.01 | 0.01 | 0.07 | 0.09 | 0.05 | 0.03 |      |
| Q6PFD9 | Nuclear pore complex protein Nup98-Nup96                                         |      | 0.04 | 0.02 |      |      |      |      |      | 0.01 |      |      | 0.01 |      |
| Q6PGB6 | N-alpha-acetyltransferase 50                                                     |      |      |      | 0.02 |      | 0.01 |      |      |      |      |      | 0.03 |      |
| Q6PGG2 | GEM-interacting protein                                                          |      |      |      |      |      |      |      |      | 0.02 | 0.05 |      |      |      |
| Q6PHN9 | Ras-related protein Rab-35                                                       | 0.10 | 0.05 | 0.06 | 0.07 | 0.14 | 0.06 | 0.07 | 0.07 | 0.09 | 0.09 | 0.08 | 0.12 |      |
| Q6PHQ9 | Polyadenylate-binding protein                                                    |      | 0.06 | 0.03 | 0.03 |      | 0.01 |      | 0.01 |      | 0.09 |      | 0.03 |      |
| Q6R0H7 | Guanine nucleotide-binding protein G(s) subunit alpha isoforms XLas              | 0.06 | 0.03 | 0.04 | 0.05 | 0.06 | 0.03 | 0.04 | 0.04 | 0.08 | 0.07 | 0.06 | 0.03 |      |
| Q6ZPH4 | MKIAA1835 protein                                                                | 0.04 | 0.06 | 0.01 |      |      |      |      |      |      | 0.08 |      |      |      |
| Q6ZQ08 | CCR4-NOT transcription complex subunit 1                                         |      |      | 0.02 |      |      |      |      |      | 0.02 | 0.08 | 0.02 | 0.01 |      |
| Q6ZQ38 | Cullin-associated NEDD8-dissociated protein 1                                    | 0.25 | 0.21 | 0.17 | 0.18 | 0.21 | 0.08 | 0.09 | 0.05 | 0.37 | 0.27 | 0.16 | 0.15 |      |
| Q6ZQ45 | MKIAA0791 protein                                                                | 0.10 | 0.07 | 0.02 | 0.02 |      |      |      |      | 0.01 | 0.09 |      |      |      |
| Q6ZQ49 | Sodium/potassium-transporting ATPase subunit alpha                               | 0.40 | 0.35 | 0.30 | 0.35 | 0.23 | 0.24 | 0.22 | 0.27 | 0.30 | 0.49 | 0.32 | 0.23 |      |
| Q6ZQ58 | La-related protein 1                                                             |      |      |      |      |      | 0.02 |      |      |      | 0.05 | 0.02 |      |      |
| Q6ZQ61 | MCG121979, isoform CRA_c                                                         | 0.11 | 0.12 | 0.06 | 0.04 | 0.02 | 0.05 | 0.02 | 0.01 | 0.04 | 0.18 | 0.05 | 0.01 |      |
| Q6ZQ84 | MKIAA0617 protein                                                                |      |      | 0.02 |      |      |      |      |      | 0.01 |      | 0.02 |      |      |
| Q6ZQF2 | MKIAA0253 protein                                                                |      |      | 0.06 | 0.03 | 0.02 | 0.01 | 0.04 | 0.03 | 0.02 |      | 0.05 |      |      |
| Q6ZQG1 | MCG21756, isoform CRA_a                                                          |      | 0.03 |      |      |      |      |      |      |      |      |      | 0.01 |      |
| Q6ZQI3 | Malectin                                                                         |      | 0.08 | 0.07 | 0.06 | 0.03 | 0.02 | 0.04 | 0.03 |      |      | 0.07 | 0.03 |      |



|        |                                                                                                          |      |      |      |      |      |      |      |      |      |      |      |      |
|--------|----------------------------------------------------------------------------------------------------------|------|------|------|------|------|------|------|------|------|------|------|------|
| Q80Y52 | Heat shock protein 90, alpha (Cytosolic), class A member 1                                               | 0.83 | 0.63 | 0.67 | 0.64 | 0.97 | 0.50 | 0.79 | 0.57 | 1.22 | 1.06 | 0.97 | 0.81 |
| Q80YG4 | SEC63                                                                                                    |      | 0.04 | 0.03 | 0.04 |      | 0.01 | 0.01 | 0.02 |      | 0.07 | 0.02 | 0.02 |
| Q80Z19 | WD repeat domain 1                                                                                       |      |      | 0.09 | 0.04 | 0.03 | 0.05 | 0.04 |      | 0.05 |      | 0.09 | 0.02 |
| Q80Z53 | 28S ribosomal protein S26, mitochondrial                                                                 |      | 0.03 | 0.02 | 0.05 | 0.03 | 0.02 |      |      | 0.02 |      | 0.03 | 0.03 |
| Q810B6 | Rabkaryin-5                                                                                              |      | 0.04 | 0.03 | 0.02 |      | 0.01 |      |      | 0.02 | 0.06 |      | 0.02 |
| Q810D6 | Glutamate-rich WD repeat-containing protein 1                                                            |      |      |      |      |      |      |      |      |      |      |      | 0.01 |
| Q811E7 | Myosin IF                                                                                                | 0.05 |      | 0.02 | 0.04 | 0.02 | 0.01 |      |      | 0.03 |      |      | 0.03 |
| Q861Q5 | H13 protein                                                                                              |      |      | 0.05 | 0.05 |      | 0.02 | 0.04 | 0.01 | 0.02 |      | 0.05 | 0.01 |
| Q8BFP9 | [Pyruvate dehydrogenase (acetyl-transferring)] kinase isozyme 1, mitochondrial                           |      |      |      | 0.01 |      |      |      |      |      |      |      |      |
| Q8BFQ8 | Parkinson disease 7 domain-containing protein 1                                                          |      |      |      |      |      |      |      |      | 0.01 |      |      |      |
| Q8BFR5 | Elongation factor Tu, mitochondrial                                                                      | 0.23 | 0.22 | 0.18 | 0.16 | 0.12 | 0.10 | 0.05 | 0.04 | 0.12 | 0.20 | 0.11 | 0.07 |
| Q8BFY6 | Peflin                                                                                                   |      |      | 0.01 | 0.02 |      |      |      |      | 0.01 |      | 0.02 | 0.02 |
| Q8BFY9 | Transportin-1                                                                                            | 0.11 | 0.09 | 0.09 | 0.06 | 0.06 | 0.06 | 0.04 | 0.03 | 0.11 | 0.18 | 0.08 | 0.05 |
| Q8BFZ3 | Beta-actin-like protein 2                                                                                | 0.43 | 0.28 | 0.23 | 0.28 | 0.70 | 0.17 | 0.38 | 0.36 | 0.69 | 0.24 | 0.54 | 0.46 |
| Q8BFZ9 | Erlin-2                                                                                                  |      |      | 0.02 | 0.02 |      | 0.01 |      |      | 0.01 |      |      | 0.02 |
| Q8BG51 | Mitochondrial Rho GTPase 1                                                                               |      |      | 0.03 |      | 0.02 |      |      |      | 0.02 |      | 0.02 |      |
| Q8BGH2 | Sorting and assembly machinery component 50 homolog                                                      |      | 0.03 |      |      |      |      |      |      |      |      |      |      |
| Q8BG50 | Protein MAK16 homolog                                                                                    |      |      | 0.02 |      |      |      |      |      |      |      |      |      |
| Q8BH24 | Transmembrane 9 superfamily member 4                                                                     |      |      | 0.02 |      |      |      | 0.02 |      |      |      | 0.03 |      |
| Q8BH59 | Calcium-binding mitochondrial carrier protein Aralar1                                                    | 0.11 | 0.11 | 0.10 | 0.24 | 0.15 | 0.07 | 0.07 | 0.15 | 0.14 |      | 0.10 | 0.09 |
| Q8BH80 | Vesicle-associated membrane protein, associated protein B and C                                          | 0.07 |      | 0.03 | 0.02 | 0.03 | 0.03 | 0.04 |      | 0.04 |      | 0.05 |      |
| Q8BH95 | Enoyl-CoA hydratase, mitochondrial                                                                       |      | 0.05 | 0.02 | 0.04 | 0.04 | 0.03 | 0.02 | 0.02 | 0.02 |      | 0.03 | 0.01 |
| Q8BHC4 | Dephospho-CoA kinase domain-containing protein                                                           |      |      |      | 0.01 |      |      |      |      |      |      |      |      |
| Q8BIG7 | Catechol O-methyltransferase domain-containing protein 1                                                 |      | 0.03 | 0.03 | 0.04 | 0.02 | 0.03 | 0.02 | 0.01 | 0.02 |      | 0.03 | 0.03 |
| Q8BIV3 | Ran-binding protein 6                                                                                    |      |      |      | 0.01 |      | 0.02 |      |      | 0.02 | 0.05 |      | 0.01 |
| Q8BJ71 | Nuclear pore complex protein Nup93                                                                       | 0.11 | 0.11 | 0.08 | 0.08 | 0.05 | 0.04 | 0.02 | 0.02 | 0.05 | 0.16 | 0.05 | 0.02 |
| Q8BJW6 | Eukaryotic translation initiation factor 2A                                                              |      |      |      |      |      |      |      |      |      |      |      | 0.02 |
| Q8BJX0 | Proteasome subunit beta type                                                                             |      |      |      |      | 0.02 |      |      |      |      |      |      | 0.03 |
| Q8BJY1 | 26S proteasome non-ATPase regulatory subunit 5                                                           |      |      |      | 0.01 |      | 0.01 |      |      | 0.01 |      |      | 0.02 |
| Q8BJZ4 | 28S ribosomal protein S35, mitochondrial                                                                 |      | 0.04 | 0.02 | 0.02 |      | 0.01 |      |      |      |      |      |      |
| Q8BK37 | Putative uncharacterized protein                                                                         |      |      | 0.04 | 0.04 |      | 0.03 | 0.03 | 0.01 | 0.04 |      | 0.05 | 0.06 |
| Q8BK67 | Protein RCC2                                                                                             |      |      |      |      |      |      |      |      | 0.02 |      |      |      |
| Q8BK72 | 28S ribosomal protein S27, mitochondrial                                                                 |      |      | 0.03 | 0.02 | 0.02 |      | 0.01 |      | 0.04 |      | 0.02 | 0.02 |
| Q8BKC5 | Importin-5                                                                                               | 0.62 | 0.47 | 0.26 | 0.24 | 0.20 | 0.21 | 0.13 | 0.08 | 0.35 | 0.69 | 0.23 | 0.15 |
| Q8BL97 | Serine/arginine-rich splicing factor 7                                                                   | 0.05 | 0.05 | 0.03 | 0.03 | 0.03 | 0.02 | 0.03 | 0.03 | 0.02 |      | 0.03 | 0.05 |
| Q8BLF1 | Neutral cholesterol ester hydrolase 1                                                                    |      |      | 0.04 | 0.02 |      | 0.01 | 0.02 |      | 0.01 |      | 0.02 | 0.01 |
| Q8BM55 | Transmembrane protein 214                                                                                |      |      | 0.01 |      |      |      |      |      |      |      |      |      |
| Q8BMA6 | Signal recognition particle subunit SRP68                                                                |      | 0.04 | 0.04 | 0.02 | 0.02 | 0.01 | 0.01 |      | 0.02 |      | 0.04 | 0.01 |
| Q8BMD8 | Calcium-binding mitochondrial carrier protein ScaMC-1                                                    |      |      |      |      |      |      |      |      | 0.01 |      |      | 0.01 |
| Q8BMF4 | Dihydrolipoyllysine-residue acetyltransferase component of pyruvate dehydrogenase complex, mitochondrial |      | 0.03 | 0.02 | 0.03 | 0.02 |      | 0.02 |      | 0.03 |      | 0.03 | 0.01 |
| Q8BMK4 | Cytoskeleton-associated protein 4                                                                        |      |      | 0.07 | 0.05 | 0.02 |      | 0.08 | 0.03 |      |      | 0.06 | 0.01 |
| Q8BMR3 | Dolichyl-diphosphooligosaccharide--protein glycosyltransferase subunit 1                                 | 0.20 | 0.18 | 0.23 | 0.21 | 0.15 | 0.09 | 0.15 | 0.19 | 0.12 |      | 0.22 | 0.13 |
| Q8BMS1 | Trifunctional enzyme subunit alpha, mitochondrial                                                        | 0.35 | 0.30 | 0.30 | 0.25 | 0.36 | 0.18 | 0.15 | 0.07 | 0.39 | 0.49 | 0.22 | 0.17 |

|        |                                                            |      |      |      |      |      |      |      |      |      |      |      |      |
|--------|------------------------------------------------------------|------|------|------|------|------|------|------|------|------|------|------|------|
| Q8BMS4 | Ubiquinone biosynthesis O-methyltransferase, mitochondrial |      |      |      |      |      |      | 0.01 |      |      |      |      |      |
| Q8BNI4 | Derlin-2                                                   |      |      |      | 0.02 | 0.03 |      |      |      | 0.02 |      |      | 0.03 |
| Q8BNW9 | Kelch repeat and BTB domain-containing protein 11          | 0.13 | 0.06 | 0.04 | 0.03 | 0.03 | 0.03 | 0.02 | 0.01 | 0.06 |      | 0.02 | 0.02 |
| Q8BP40 | Lysophosphatidic acid phosphatase type 6                   |      |      | 0.03 |      |      |      | 0.01 |      |      |      | 0.02 |      |
| Q8BP47 | Asparagine--tRNA ligase, cytoplasmic                       | 0.12 | 0.09 | 0.10 | 0.09 | 0.09 | 0.08 | 0.07 | 0.03 | 0.08 | 0.10 | 0.08 | 0.06 |
| Q8BP48 | Methionine aminopeptidase 1                                |      |      |      |      |      |      |      |      | 0.02 |      | 0.02 |      |
| Q8BQS7 | Putative uncharacterized protein                           |      |      |      | 0.02 |      |      | 0.02 |      |      |      |      |      |
| Q8BRF7 | Sec1 family domain-containing protein 1                    |      | 0.04 | 0.03 |      |      |      |      |      |      |      |      | 0.01 |
| Q8BSL7 | ADP-ribosylation factor 2                                  | 0.23 | 0.15 | 0.16 | 0.23 | 0.26 | 0.17 | 0.12 | 0.11 |      | 0.21 | 0.18 | 0.23 |
| Q8BSY0 | Aspartyl/asparaginyl beta-hydroxylase                      | 0.12 | 0.09 | 0.13 | 0.12 |      | 0.05 | 0.05 | 0.07 | 0.04 | 0.11 | 0.08 | 0.06 |
| Q8BT90 | Putative uncharacterized protein                           | 0.07 |      | 0.13 | 0.12 | 0.10 | 0.07 | 0.09 | 0.09 |      |      | 0.11 | 0.09 |
| Q8BTF0 | Coatomer subunit alpha                                     | 0.17 | 0.16 | 0.14 | 0.11 | 0.08 | 0.06 | 0.05 | 0.04 | 0.18 | 0.25 | 0.13 | 0.07 |
| Q8BTZ7 | Mannose-1-phosphate guanyltransferase beta                 |      |      |      |      |      | 0.01 |      |      | 0.02 |      | 0.02 |      |
| Q8BU20 | Putative uncharacterized protein                           |      |      | 0.02 |      | 0.02 |      | 0.01 |      |      |      | 0.02 | 0.01 |
| Q8BU30 | Isoleucine--tRNA ligase, cytoplasmic                       | 0.08 | 0.11 | 0.14 | 0.08 | 0.07 | 0.06 | 0.03 |      | 0.17 |      | 0.08 | 0.09 |
| Q8BU31 | Ras-related protein Rap-2c                                 |      |      | 0.03 | 0.01 | 0.03 | 0.02 |      | 0.01 |      |      | 0.03 | 0.05 |
| Q8BU88 | 39S ribosomal protein L22, mitochondrial                   |      |      | 0.01 | 0.04 | 0.02 | 0.02 |      | 0.01 |      |      | 0.02 | 0.03 |
| Q8BUE4 | Apoptosis-inducing factor 2                                |      |      | 0.01 |      |      |      |      |      |      |      |      |      |
| Q8BV66 | Interferon-induced protein 44                              |      |      |      |      |      | 0.02 |      |      |      |      |      |      |
| Q8BVE3 | V-type proton ATPase subunit H                             |      | 0.04 | 0.03 | 0.02 |      |      | 0.01 |      | 0.02 |      | 0.02 | 0.01 |
| Q8BVK3 | Putative uncharacterized protein                           |      |      |      |      | 0.02 |      | 0.01 | 0.01 |      |      | 0.02 |      |
| Q8BVQ5 | Protein phosphatase methylesterase 1                       |      |      |      |      |      |      |      |      |      |      | 0.02 |      |
| Q8BVQ9 | 26S protease regulatory subunit 7                          | 0.19 | 0.15 | 0.16 | 0.13 | 0.09 | 0.07 | 0.07 | 0.04 | 0.13 | 0.15 | 0.13 | 0.08 |
| Q8BWT1 | 3-ketoacyl-CoA thiolase, mitochondrial                     | 0.10 | 0.08 | 0.06 | 0.06 | 0.04 | 0.03 |      |      | 0.06 |      | 0.02 | 0.02 |
| Q8BWU5 | Probable tRNA N6-adenosine threonylcarbamoyltransferase    | 0.05 | 0.05 |      |      |      |      |      |      |      |      |      |      |
| Q8BWZ3 | N-alpha-acetyltransferase 25, NatB auxiliary subunit       |      |      |      |      |      |      |      | 0.01 | 0.03 |      |      | 0.02 |
| Q8BX70 | Vacuolar protein sorting-associated protein 13C            | 0.23 | 0.30 | 0.28 | 0.17 | 0.22 | 0.11 | 0.12 | 0.03 | 0.40 | 0.44 | 0.23 | 0.09 |
| Q8BXC6 | COMM domain-containing protein 2                           |      |      |      | 0.02 | 0.03 | 0.02 |      | 0.01 |      |      |      | 0.01 |
| Q8BXK9 | Chloride intracellular channel protein 5                   |      |      | 0.01 | 0.02 |      |      | 0.02 |      |      |      |      | 0.02 |
| Q8BXL7 | ADP-ribosylation factor-related protein 1                  |      |      |      | 0.01 |      | 0.01 |      |      |      |      |      | 0.01 |
| Q8BXV2 | BRI3-binding protein                                       |      |      | 0.02 | 0.04 | 0.02 | 0.02 | 0.02 |      |      |      | 0.02 | 0.01 |
| Q8BXZ1 | Protein disulfide-isomerase TMX3                           |      |      | 0.04 | 0.03 | 0.03 | 0.01 | 0.01 | 0.03 | 0.02 |      | 0.03 | 0.02 |
| Q8BYA0 | Tubulin-specific chaperone D                               | 0.05 | 0.06 | 0.03 | 0.03 |      | 0.03 | 0.02 |      | 0.04 |      | 0.02 | 0.02 |
| Q8BYB9 | Protein O-glucosyltransferase 1                            |      |      | 0.02 |      |      |      |      |      |      |      |      |      |
| Q8BYI6 | Lysophosphatidylcholine acyltransferase 2                  |      |      |      |      |      | 0.01 |      |      |      |      |      |      |
| Q8BYK6 | YTH domain-containing family protein 3                     |      |      |      |      |      |      |      |      | 0.01 |      |      |      |
| Q8BYL4 | Tyrosine--tRNA ligase, mitochondrial                       |      |      | 0.01 |      |      |      |      |      |      |      |      |      |
| Q8BZA9 | Fructose-2,6-bisphosphatase TIGAR                          |      | 0.04 |      | 0.02 |      | 0.01 |      |      | 0.01 |      |      |      |
| Q8C0C7 | Phenylalanine--tRNA ligase alpha subunit                   |      | 0.04 | 0.06 | 0.04 | 0.02 | 0.01 |      |      | 0.04 |      | 0.02 | 0.02 |
| Q8C0E2 | Vacuolar protein sorting-associated protein 26B            |      |      |      |      |      |      |      |      |      |      | 0.02 | 0.01 |
| Q8C129 | Leucyl-cystinyl aminopeptidase                             |      |      | 0.06 | 0.06 |      | 0.01 | 0.04 | 0.03 | 0.01 |      | 0.05 | 0.01 |
| Q8C142 | Low density lipoprotein receptor adapter protein 1         |      |      |      |      |      |      |      |      |      |      |      | 0.01 |
| Q8C1A5 | Thimet oligopeptidase                                      |      |      |      |      |      |      |      |      |      |      |      | 0.01 |
| Q8C1W9 | Putative uncharacterized protein                           |      |      | 0.02 |      | 0.02 | 0.02 |      |      |      |      | 0.02 |      |
| Q8C243 | Putative uncharacterized protein                           |      |      |      |      |      |      |      |      |      |      | 0.02 |      |
| Q8C2E7 | WASH complex subunit strumpellin                           |      |      |      |      |      |      |      |      |      |      |      | 0.01 |
| Q8C2Q3 | RNA-binding protein 14                                     |      | 0.04 |      |      |      |      |      |      |      |      |      |      |
| Q8C2Q7 | Heterogeneous nuclear ribonucleoprotein H                  | 0.25 | 0.18 | 0.13 | 0.14 | 0.14 | 0.11 | 0.03 | 0.07 | 0.14 | 0.18 | 0.11 | 0.08 |
| Q8C338 | Isocitrate dehydrogenase [NADP]                            |      |      | 0.04 |      | 0.06 |      | 0.06 | 0.06 | 0.06 | 0.06 | 0.04 | 0.12 |
| Q8C3J5 | Dedicator of cytokinesis protein 2                         |      | 0.12 | 0.08 | 0.05 | 0.03 | 0.03 | 0.01 |      | 0.08 | 0.11 | 0.03 | 0.06 |





|        |                                                                          |      |      |      |      |      |      |      |      |      |      |      |      |      |
|--------|--------------------------------------------------------------------------|------|------|------|------|------|------|------|------|------|------|------|------|------|
| Q8K224 | N-acetyltransferase 10                                                   |      | 0.04 | 0.02 | 0.02 |      |      |      |      | 0.01 | 0.06 |      |      |      |
| Q8K297 | Procollagen galactosyltransferase 1                                      | 0.07 | 0.09 | 0.06 | 0.08 | 0.05 | 0.03 | 0.01 | 0.02 | 0.04 | 0.11 | 0.03 | 0.03 |      |
| Q8K2B3 | Succinate dehydrogenase [ubiquinone] flavoprotein subunit, mitochondrial |      | 0.03 | 0.10 | 0.04 | 0.08 | 0.02 | 0.11 | 0.19 | 0.05 |      | 0.11 | 0.11 |      |
| Q8K2C7 | Protein-9                                                                |      |      |      | 0.02 |      |      |      |      |      |      |      |      |      |
| Q8K2M0 | 39S ribosomal protein L38, mitochondrial                                 |      |      | 0.02 |      |      |      |      |      |      |      | 0.02 |      |      |
| Q8K2T1 | NmrA-like family domain-containing protein 1                             |      | 0.04 | 0.02 | 0.02 | 0.02 | 0.02 |      |      | 0.01 |      |      | 0.02 |      |
| Q8K2Y7 | 39S ribosomal protein L47, mitochondrial                                 |      |      |      | 0.03 |      | 0.02 |      |      | 0.01 |      |      | 0.05 |      |
| Q8K2Z4 | Condensin complex subunit 1                                              |      |      |      |      | 0.02 |      |      |      | 0.02 |      |      |      |      |
| Q8K363 | ATP-dependent RNA helicase DDX18                                         |      | 0.04 | 0.03 | 0.02 |      |      | 0.02 |      | 0.01 |      | 0.02 |      |      |
| Q8K469 | 2'-5'-oligoadenylate synthetase 1G                                       |      | 0.03 |      |      |      |      | 0.01 |      |      |      |      |      |      |
| Q8K4Z5 | Splicing factor 3A subunit 1                                             | 0.06 | 0.05 | 0.02 | 0.02 |      | 0.01 | 0.02 |      | 0.02 | 0.05 | 0.03 |      |      |
| Q8QZY1 | Eukaryotic translation initiation factor 3 subunit L                     | 0.08 | 0.11 | 0.10 | 0.08 | 0.07 | 0.04 | 0.06 | 0.07 | 0.10 | 0.09 | 0.08 | 0.11 |      |
| Q8R010 | Aminoacyl tRNA synthase complex-interacting multifunctional protein 2    |      | 0.04 | 0.02 | 0.02 |      | 0.02 |      |      | 0.02 |      |      | 0.02 |      |
| Q8R050 | Eukaryotic peptide chain release factor GTP-binding subunit ERF3A        |      | 0.05 | 0.03 | 0.02 |      | 0.02 | 0.03 |      | 0.03 |      | 0.04 | 0.01 |      |
| Q8R0J2 | Mannose-P-dolichol utilization defect 1                                  |      |      |      |      |      |      |      | 0.01 |      |      |      | 0.03 |      |
| Q8R1B4 | Eukaryotic translation initiation factor 3 subunit C                     | 0.15 | 0.11 | 0.09 | 0.08 | 0.04 | 0.05 | 0.04 | 0.04 | 0.10 | 0.18 | 0.07 | 0.05 |      |
| Q8R1F1 | Niban-like protein 1                                                     |      |      | 0.07 | 0.07 |      | 0.02 | 0.03 | 0.04 | 0.03 |      | 0.07 | 0.06 |      |
| Q8R1Q8 | Cytoplasmic dynein 1 light intermediate chain 1                          |      | 0.07 | 0.06 | 0.05 | 0.03 | 0.03 | 0.01 |      | 0.05 | 0.06 | 0.04 | 0.02 |      |
| Q8R1V4 | Transmembrane emp24 domain-containing protein 4                          |      |      | 0.02 | 0.02 | 0.02 | 0.02 | 0.01 |      | 0.01 |      | 0.02 |      |      |
| Q8R2P8 | Lysine--tRNA ligase                                                      |      | 0.05 | 0.02 | 0.02 | 0.03 | 0.02 | 0.04 |      | 0.01 | 0.06 | 0.12 | 0.05 | 0.02 |
| Q8R2Q8 | Bone marrow stromal antigen 2                                            |      |      |      | 0.02 | 0.07 | 0.04 |      |      | 0.06 | 0.01 |      | 0.01 |      |
| Q8R2Y0 | Monoacylglycerol lipase ABHD6                                            |      |      |      | 0.01 |      |      |      |      |      |      |      |      |      |
| Q8R2Y8 | Peptidyl-tRNA hydrolase 2, mitochondrial                                 |      |      | 0.01 | 0.02 |      |      |      |      |      |      | 0.02 | 0.01 |      |
| Q8R3Z3 | Replication factor C subunit 3                                           | 0.07 | 0.05 |      |      |      | 0.01 |      |      |      |      |      |      |      |
| Q8R395 | COMM domain-containing protein 5                                         |      |      |      | 0.02 |      | 0.01 |      |      | 0.01 |      |      |      |      |
| Q8R480 | Nuclear pore complex protein Nup85                                       |      | 0.02 |      | 0.02 |      |      |      |      | 0.02 |      |      |      |      |
| Q8R4R6 | Nucleoporin NUP53                                                        | 0.05 | 0.09 | 0.03 | 0.04 |      | 0.03 |      |      | 0.01 |      | 0.08 | 0.03 |      |
| Q8R5C5 | Beta-centractin                                                          |      |      | 0.03 | 0.04 | 0.07 | 0.03 | 0.05 |      | 0.05 | 0.08 |      | 0.05 | 0.06 |
| Q8VBTO | Thioredoxin-related transmembrane protein 1                              |      |      | 0.03 | 0.02 |      | 0.02 | 0.03 | 0.02 | 0.02 |      |      | 0.03 | 0.01 |
| Q8VBX5 | Palmitoyl-protein thioesterase                                           |      |      |      | 0.02 |      | 0.02 | 0.02 |      |      |      |      | 0.02 |      |
| Q8VBZ3 | Cleft lip and palate transmembrane protein 1 homolog                     |      | 0.04 |      |      |      |      |      |      |      | 0.05 |      |      |      |
| Q8VCE0 | Sodium/potassium-transporting ATPase subunit alpha                       | 0.42 | 0.38 | 0.34 | 0.37 | 0.26 | 0.26 | 0.24 | 0.27 | 0.34 | 0.55 | 0.36 | 0.23 |      |
| Q8VCG1 | Deoxyuridine triphosphatase, isoform CRA_b                               |      |      |      |      |      |      |      |      |      |      |      | 0.01 |      |
| Q8VCM8 | Nicalin                                                                  |      | 0.04 | 0.04 | 0.03 |      | 0.02 | 0.01 |      | 0.01 | 0.01 | 0.04 | 0.02 | 0.03 |
| Q8VCS9 | Transporter                                                              |      |      | 0.02 | 0.01 |      | 0.01 |      |      | 0.01 | 0.02 |      |      | 0.01 |
| Q8VCT3 | Aminopeptidase B                                                         |      |      |      |      | 0.02 | 0.02 |      |      | 0.01 | 0.02 |      |      | 0.04 |
| Q8VDC3 | Aconitate hydratase                                                      |      |      | 0.03 | 0.04 | 0.06 | 0.03 | 0.02 |      | 0.01 | 0.06 |      | 0.04 | 0.04 |
| Q8VDD5 | Myosin-9                                                                 | 0.61 | 1.07 | 0.26 | 0.08 | 3.89 | 0.07 | 1.15 | 0.17 | 4.03 | 0.15 | 0.19 | 1.45 |      |
| Q8VDL4 | ADP-dependent glucokinase                                                |      |      | 0.04 |      |      |      |      | 0.02 | 0.01 |      |      | 0.03 |      |
| Q8VDN2 | Sodium/potassium-transporting ATPase subunit alpha-1                     | 0.91 | 0.76 | 0.78 | 0.85 | 0.63 | 0.55 | 0.59 | 0.62 | 0.79 | 1.21 | 0.86 | 0.55 |      |
| Q8VDP4 | Cell cycle and apoptosis regulator protein 2                             |      |      | 0.02 | 0.02 |      | 0.02 |      |      |      | 0.06 |      |      |      |
| Q8VDP6 | CDP-diacylglycerol--inositol 3-phosphatidyltransferase                   |      |      | 0.02 | 0.02 |      |      |      |      | 0.03 |      |      |      | 0.04 |
| Q8VE70 | Programmed cell death protein 10                                         |      |      |      |      |      | 0.01 |      |      |      |      |      |      |      |
| Q8VE96 | Solute carrier family 35 member F6                                       |      |      |      |      |      |      |      |      |      |      |      |      | 0.01 |
| Q8VE99 | Coiled-coil domain-containing protein 115                                |      |      | 0.02 | 0.02 |      |      |      |      |      |      |      | 0.02 |      |
| Q8VEH3 | ADP-ribosylation factor-like protein 8A                                  | 0.04 | 0.03 | 0.05 | 0.06 | 0.05 | 0.03 | 0.05 | 0.06 |      |      | 0.05 | 0.05 |      |
| Q8VH51 | RNA-binding protein 39                                                   | 0.13 | 0.06 | 0.03 | 0.03 |      | 0.02 |      |      |      |      | 0.02 | 0.01 |      |
| Q8VHK9 | ATP-dependent RNA helicase DHX36                                         |      | 0.03 |      |      |      |      |      |      | 0.02 |      |      |      |      |

|        |                                                                                               |      |      |      |      |      |      |      |      |      |      |      |      |
|--------|-----------------------------------------------------------------------------------------------|------|------|------|------|------|------|------|------|------|------|------|------|
| Q8VI75 | Importin-4                                                                                    |      | 0.06 | 0.02 | 0.03 |      | 0.01 |      |      | 0.02 | 0.07 |      | 0.02 |
| Q8VI93 | 2'-5'-oligoadenylate synthase 3                                                               |      | 0.03 |      | 0.02 |      | 0.01 |      |      |      |      |      | 0.01 |
| Q8VIJ6 | Splicing factor, proline- and glutamine-rich                                                  | 0.19 | 0.15 | 0.14 | 0.11 | 0.11 | 0.11 | 0.05 | 0.05 | 0.16 | 0.39 | 0.08 | 0.02 |
| Q91V61 | Sideroflexin-3                                                                                |      |      |      |      |      |      |      |      |      |      |      | 0.01 |
| Q91VA7 | Isocitrate dehydrogenase [NAD] subunit, mitochondrial                                         | 0.12 | 0.19 | 0.09 | 0.08 |      | 0.05 | 0.03 | 0.01 | 0.03 |      | 0.05 | 0.02 |
| Q91VC3 | Eukaryotic initiation factor 4A-III                                                           | 0.19 | 0.17 | 0.09 | 0.07 | 0.11 | 0.06 | 0.05 | 0.04 | 0.11 | 0.15 | 0.09 | 0.05 |
| Q91VC9 | Growth hormone-inducible transmembrane protein                                                |      | 0.05 | 0.06 | 0.05 | 0.08 | 0.04 | 0.06 | 0.03 | 0.06 |      | 0.07 | 0.01 |
| Q91VD9 | NADH-ubiquinone oxidoreductase 75 kDa subunit, mitochondrial                                  | 0.16 | 0.21 | 0.19 | 0.18 | 0.13 | 0.10 | 0.08 | 0.09 | 0.12 | 0.28 | 0.17 | 0.14 |
| Q91VE6 | MKI67 FHA domain-interacting nucleolar phosphoprotein                                         |      | 0.07 |      |      |      | 0.01 |      |      |      |      |      |      |
| Q91VK1 | Basic leucine zipper and W2 domain-containing protein 2                                       | 0.07 | 0.06 | 0.05 | 0.01 | 0.02 | 0.02 |      |      | 0.05 | 0.06 | 0.02 | 0.01 |
| Q91VM5 | RNA binding motif protein, X-linked-like-1                                                    |      |      | 0.06 | 0.05 |      | 0.02 |      |      | 0.04 | 0.06 | 0.02 | 0.01 |
| Q91VN4 | MICOS complex subunit Mic25                                                                   |      | 0.03 |      |      |      |      |      |      |      |      |      |      |
| Q91VR5 | ATP-dependent RNA helicase DDX1                                                               | 0.08 | 0.07 | 0.10 | 0.06 | 0.06 | 0.04 | 0.03 |      | 0.14 | 0.15 | 0.07 | 0.01 |
| Q91W06 | V-type proton ATPase subunit a                                                                | 0.11 | 0.10 | 0.17 | 0.20 | 0.17 | 0.11 | 0.12 | 0.15 | 0.25 | 0.17 | 0.17 | 0.11 |
| Q91W53 | Golgin subfamily A member 7                                                                   |      |      |      |      |      |      |      |      |      |      |      | 0.01 |
| Q91WD5 | NADH dehydrogenase [ubiquinone] iron-sulfur protein 2, mitochondrial                          | 0.08 | 0.05 | 0.09 | 0.05 | 0.04 | 0.02 | 0.05 | 0.02 | 0.05 | 0.06 | 0.08 | 0.04 |
| Q91X52 | L-xylulose reductase                                                                          |      |      |      |      |      |      |      |      | 0.03 |      |      |      |
| Q91X78 | Erlin-1                                                                                       |      |      |      | 0.01 |      | 0.01 |      | 0.01 |      |      |      | 0.02 |
| Q91XD6 | Vacuolar protein-sorting-associated protein 36                                                |      |      | 0.03 | 0.02 | 0.04 | 0.02 | 0.02 |      | 0.04 |      | 0.04 | 0.01 |
| Q91YE6 | Importin-9                                                                                    |      | 0.05 | 0.02 | 0.02 |      | 0.03 | 0.01 |      | 0.05 | 0.08 |      | 0.02 |
| Q91YH5 | Atlastin-3                                                                                    |      | 0.03 |      |      |      |      |      |      |      |      |      |      |
| Q91YM4 | Protein TBRG4                                                                                 |      |      |      | 0.01 |      |      |      |      |      |      |      |      |
| Q91YN9 | BAG family molecular chaperone regulator 2                                                    |      |      |      | 0.01 |      |      |      |      |      |      |      | 0.02 |
| Q91YR7 | Pre-mRNA-processing factor 6                                                                  |      | 0.07 |      |      |      |      |      |      |      |      |      |      |
| Q91YT0 | NADH dehydrogenase [ubiquinone] flavoprotein 1, mitochondrial                                 |      | 0.03 | 0.06 | 0.06 | 0.02 | 0.02 | 0.04 | 0.01 | 0.03 |      | 0.05 | 0.04 |
| Q91YT7 | YTH domain-containing family protein 2                                                        |      |      |      |      |      | 0.01 |      |      | 0.02 |      |      |      |
| Q91YW3 | DnaJ homolog subfamily C member 3                                                             |      |      | 0.03 | 0.03 |      | 0.01 |      |      | 0.01 |      |      |      |
| Q91YY4 | ATP synthase mitochondrial F1 complex assembly factor 2                                       |      |      |      | 0.02 |      | 0.01 |      |      |      |      |      | 0.01 |
| Q91Z25 | Actin-related protein 2/3 complex subunit 1B                                                  |      |      |      |      | 0.02 |      | 0.01 | 0.01 | 0.02 |      | 0.02 | 0.03 |
| Q91ZR1 | Ras-related protein Rab-4B                                                                    | 0.04 |      | 0.03 |      | 0.05 |      | 0.03 | 0.03 | 0.04 |      | 0.04 | 0.02 |
| Q91ZW3 | SWI/SNF-related matrix-associated actin-dependent regulator of chromatin subfamily A member 5 | 0.08 | 0.06 | 0.03 | 0.02 | 0.02 | 0.02 |      |      | 0.03 | 0.06 |      | 0.01 |
| Q91ZX7 | Prolow-density lipoprotein receptor-related protein 1                                         | 0.08 | 0.05 | 0.13 | 0.11 | 0.07 | 0.02 | 0.10 | 0.06 | 0.09 |      | 0.14 | 0.05 |
| Q920A5 | Retinoid-inducible serine carboxypeptidase                                                    |      |      | 0.02 |      |      | 0.01 |      |      |      |      | 0.02 | 0.01 |
| Q920E5 | Farnesyl pyrophosphate synthase                                                               | 0.15 | 0.14 | 0.09 | 0.20 | 0.14 | 0.11 | 0.07 | 0.09 | 0.20 | 0.09 | 0.10 | 0.21 |
| Q920Q6 | RNA-binding protein Musashi homolog 2                                                         |      |      | 0.02 | 0.01 |      |      |      |      |      |      |      |      |
| Q921F2 | TAR DNA-binding protein 43                                                                    | 0.12 | 0.15 | 0.05 | 0.04 | 0.03 | 0.08 | 0.02 | 0.01 | 0.07 | 0.13 | 0.03 | 0.03 |
| Q921G7 | Electron transfer flavoprotein-ubiquinone oxidoreductase, mitochondrial                       |      |      | 0.06 | 0.07 | 0.02 | 0.03 | 0.01 |      | 0.01 |      | 0.03 |      |
| Q921H8 | 3-ketoacyl-CoA thiolase A, peroxisomal                                                        | 0.23 | 0.25 | 0.18 | 0.10 | 0.15 | 0.12 | 0.09 | 0.07 | 0.19 | 0.25 | 0.17 | 0.15 |
| Q921M7 | Protein FAM49B                                                                                | 0.16 | 0.19 | 0.11 | 0.08 | 0.10 | 0.08 | 0.07 | 0.04 | 0.10 |      | 0.12 | 0.10 |
| Q921N6 | Probable ATP-dependent RNA helicase DDX27                                                     |      |      |      |      |      |      |      |      | 0.02 |      |      |      |
| Q921S7 | 39S ribosomal protein L37, mitochondrial                                                      |      |      |      |      |      |      |      |      |      |      |      | 0.01 |
| Q921T2 | Torsin-1A-interacting protein 1                                                               |      | 0.04 | 0.04 | 0.02 |      |      |      | 0.01 |      |      |      |      |
| Q921Y2 | U3 small nucleolar ribonucleoprotein protein IMP3                                             | 0.05 |      |      | 0.01 |      | 0.01 |      |      |      |      |      | 0.01 |
| Q922F4 | Tubulin beta-6 chain                                                                          | 0.56 | 0.46 | 0.37 | 0.42 | 0.28 | 0.32 | 0.14 | 0.13 | 0.37 | 0.40 | 0.22 | 0.46 |

|        |                                                                              |      |      |      |      |      |      |      |      |      |      |      |      |
|--------|------------------------------------------------------------------------------|------|------|------|------|------|------|------|------|------|------|------|------|
| Q922J9 | Fatty acyl-CoA reductase 1                                                   | 0.05 | 0.06 | 0.06 | 0.08 | 0.02 | 0.03 | 0.03 | 0.03 | 0.02 | 0.07 | 0.04 | 0.05 |
| Q922Q1 | Mitochondrial amidoxime reducing component 2                                 |      |      | 0.02 |      |      |      | 0.02 |      |      |      | 0.04 |      |
| Q922Q8 | Leucine-rich repeat-containing protein 59                                    | 0.08 | 0.05 | 0.10 | 0.06 | 0.06 | 0.04 | 0.05 | 0.07 | 0.03 |      | 0.10 |      |
| Q922Y1 | UBX domain-containing protein 1                                              |      |      |      |      |      |      |      |      | 0.01 |      |      |      |
| Q923G2 | DNA-directed RNA polymerases I, II, and III subunit RPABC3                   | 0.06 |      | 0.02 | 0.02 | 0.04 | 0.01 |      | 0.01 |      |      | 0.02 | 0.02 |
| Q924T2 | 28S ribosomal protein S2, mitochondrial                                      |      | 0.03 | 0.03 | 0.03 | 0.02 | 0.02 | 0.01 | 0.01 | 0.04 |      | 0.03 | 0.02 |
| Q925I1 | ATPase family AAA domain-containing protein 3                                |      | 0.03 | 0.02 | 0.03 | 0.02 | 0.01 |      |      | 0.03 |      |      | 0.02 |
| Q99J95 | Cyclin-dependent kinase 9                                                    |      |      | 0.04 | 0.03 |      | 0.02 |      | 0.01 | 0.02 |      | 0.02 | 0.02 |
| Q99JB2 | Stomatin-like protein 2, mitochondrial                                       | 0.08 | 0.10 | 0.06 | 0.16 | 0.05 | 0.10 | 0.05 | 0.05 | 0.08 |      | 0.06 | 0.04 |
| Q99JL4 | 26S proteasome non-ATPase regulatory subunit 6                               | 0.09 | 0.10 | 0.09 | 0.04 | 0.03 | 0.03 | 0.04 | 0.03 | 0.06 |      | 0.09 | 0.04 |
| Q99JL6 | Ras-related protein Rap-1b                                                   | 0.13 |      | 0.06 | 0.10 | 0.22 | 0.05 | 0.08 | 0.06 |      |      | 0.08 | 0.06 |
| Q99JR1 | Sideroflexin-1                                                               | 0.07 | 0.08 | 0.04 | 0.05 | 0.04 | 0.04 | 0.02 | 0.03 | 0.03 | 0.05 | 0.02 | 0.06 |
| Q99JX4 | Eukaryotic translation initiation factor 3 subunit M                         | 0.12 | 0.12 | 0.05 | 0.04 | 0.02 | 0.05 | 0.03 | 0.01 | 0.04 |      | 0.05 | 0.02 |
| Q99JY0 | Trifunctional enzyme subunit beta, mitochondrial                             | 0.13 | 0.11 | 0.14 | 0.11 | 0.14 | 0.09 | 0.06 | 0.03 | 0.17 |      | 0.09 | 0.05 |
| Q99JZ4 | GTP-binding protein SAR1a                                                    |      |      | 0.07 | 0.09 | 0.13 | 0.05 | 0.04 | 0.05 | 0.07 | 0.06 | 0.08 | 0.08 |
| Q99K01 | Pyridoxal-dependent decarboxylase domain-containing protein 1                |      | 0.05 |      | 0.01 |      | 0.01 |      |      |      | 0.07 |      | 0.01 |
| Q99K87 | Serine hydroxymethyltransferase                                              | 0.38 | 0.32 | 0.41 | 0.79 | 0.46 | 0.39 | 0.18 | 0.20 | 0.47 | 0.24 | 0.32 | 0.36 |
| Q99KC8 | von Willebrand factor A domain-containing protein 5A                         |      | 0.05 | 0.02 | 0.04 |      | 0.01 |      |      |      |      |      |      |
| Q99KD5 | Protein unc-45 homolog A                                                     |      |      |      |      |      | 0.01 |      |      |      |      |      |      |
| Q99KI0 | Aconitate hydratase, mitochondrial                                           | 0.06 | 0.11 | 0.15 | 0.19 | 0.24 | 0.13 | 0.07 | 0.15 | 0.35 | 0.11 | 0.16 | 0.17 |
| Q99KI3 | ER membrane protein complex subunit 3                                        |      | 0.04 | 0.02 | 0.04 | 0.02 | 0.02 | 0.01 | 0.01 | 0.02 |      | 0.03 | 0.02 |
| Q99KK9 | Probable histidine--tRNA ligase, mitochondrial                               |      |      |      |      | 0.04 |      | 0.02 |      | 0.02 |      | 0.02 | 0.01 |
| Q99KV1 | DnaJ homolog subfamily B member 11                                           |      | 0.10 | 0.08 | 0.06 | 0.02 | 0.03 | 0.02 | 0.02 | 0.02 |      | 0.07 |      |
| Q99L04 | Dehydrogenase/reductase SDR family member 1                                  |      |      | 0.03 | 0.02 | 0.02 | 0.02 | 0.01 | 0.02 | 0.02 |      |      | 0.03 |
| Q99LB6 | Methionine adenosyltransferase 2 subunit beta                                |      |      |      |      | 0.03 |      |      |      | 0.02 |      |      |      |
| Q99LC3 | NADH dehydrogenase [ubiquinone] 1 alpha subcomplex subunit 10, mitochondrial |      | 0.04 | 0.03 |      |      |      |      |      | 0.02 |      |      | 0.01 |
| Q99LC5 | Electron transfer flavoprotein subunit alpha, mitochondrial                  | 0.26 | 0.29 | 0.20 | 0.23 | 0.25 | 0.17 | 0.10 | 0.08 | 0.26 | 0.25 | 0.17 | 0.13 |
| Q99LI7 | Cleavage stimulation factor subunit 3                                        |      |      |      |      |      |      |      |      | 0.02 |      |      |      |
| Q99LX0 | Protein deglycase DJ-1                                                       |      |      |      | 0.03 |      |      |      |      |      |      |      |      |
| Q99M31 | Heat shock 70 kDa protein 14                                                 |      | 0.02 | 0.03 |      |      | 0.01 | 0.02 |      | 0.03 |      | 0.03 |      |
| Q99M87 | DnaJ homolog subfamily A member 3, mitochondrial                             | 0.04 | 0.04 | 0.02 | 0.03 |      | 0.02 |      |      | 0.02 |      |      |      |
| Q99ME9 | Nucleolar GTP-binding protein 1                                              |      |      | 0.02 |      |      |      |      |      |      |      |      | 0.01 |
| Q99MR3 | Solute carrier family 12 member 9                                            |      |      | 0.03 |      |      |      |      |      | 0.02 |      |      |      |
| Q99MR6 | Serrate RNA effector molecule homolog                                        | 0.15 | 0.12 | 0.10 | 0.07 | 0.07 | 0.06 | 0.05 | 0.03 | 0.10 | 0.18 | 0.09 | 0.02 |
| Q99MR8 | Methylcrotonoyl-CoA carboxylase subunit alpha, mitochondrial                 | 0.32 | 0.15 | 0.13 | 0.08 | 0.02 | 0.07 |      |      |      | 0.28 |      |      |
| Q99N96 | 39S ribosomal protein L1, mitochondrial                                      |      | 0.03 |      | 0.01 | 0.03 | 0.02 |      |      | 0.03 |      |      |      |
| Q99P31 | Hsp70-binding protein 1                                                      |      | 0.05 | 0.02 | 0.02 | 0.02 | 0.04 | 0.02 |      | 0.05 |      | 0.02 | 0.01 |
| Q99P72 | Reticulon-4                                                                  |      | 0.03 | 0.04 | 0.02 |      |      | 0.03 | 0.01 | 0.02 |      | 0.04 | 0.01 |
| Q99PL5 | Ribosome-binding protein 1                                                   |      | 0.05 |      | 0.02 |      | 0.02 |      | 0.01 |      |      |      | 0.01 |
| Q99PV0 | Pre-mRNA-processing-splicing factor 8                                        |      |      | 0.02 | 0.03 | 0.05 |      | 0.01 | 0.02 | 0.09 |      | 0.05 | 0.03 |
| Q9BDB7 | Interferon-induced protein 44-like                                           |      |      |      |      |      | 0.03 |      |      |      |      |      |      |
| Q9CPP6 | NADH dehydrogenase [ubiquinone] 1 alpha subcomplex subunit 5                 |      |      |      |      |      |      |      |      |      |      |      | 0.02 |
| Q9CPQ3 | Mitochondrial import receptor subunit TOM22 homolog                          | 0.08 | 0.05 | 0.03 | 0.06 | 0.04 | 0.02 | 0.01 | 0.02 |      |      | 0.02 | 0.06 |
| Q9CPR5 | 39S ribosomal protein L15, mitochondrial                                     |      |      |      | 0.02 |      |      |      |      | 0.01 |      |      | 0.02 |
| Q9CPT4 | Myeloid-derived growth factor                                                |      |      |      |      |      |      |      | 0.01 |      |      |      |      |
| Q9CPT5 | Nucleolar protein 16                                                         |      | 0.07 | 0.03 |      |      | 0.03 |      |      |      |      | 0.03 |      |

|        |                                                                       |      |      |      |      |      |      |      |      |      |      |      |      |
|--------|-----------------------------------------------------------------------|------|------|------|------|------|------|------|------|------|------|------|------|
| Q9CPU4 | Microsomal glutathione S-transferase 3                                |      |      |      |      |      |      |      |      |      |      |      | 0.01 |
| Q9CPX7 | 28S ribosomal protein S16, mitochondrial                              |      |      |      |      |      |      |      |      |      |      |      | 0.01 |
| Q9CPY7 | Cytosol aminopeptidase                                                |      |      |      | 0.01 | 0.02 |      |      | 0.02 |      |      | 0.02 | 0.02 |
| Q9CQ02 | COMM domain-containing protein 4                                      |      |      |      | 0.02 |      |      |      |      |      |      |      | 0.01 |
| Q9CQ22 | Ragulator complex protein LAMTOR1                                     |      |      |      |      | 0.02 |      |      |      |      |      |      | 0.02 |
| Q9CQ40 | 39S ribosomal protein L49, mitochondrial                              |      |      |      |      |      |      |      |      |      |      |      | 0.01 |
| Q9CQ60 | 6-phosphogluconolactonase                                             |      | 0.08 | 0.04 | 0.06 | 0.10 | 0.05 | 0.05 | 0.01 | 0.08 |      | 0.05 | 0.07 |
| Q9CQ65 | S-methyl-5'-thioadenosine phosphorylase                               |      |      |      |      |      |      |      |      |      |      |      | 0.01 |
| Q9CQ71 | Replication protein A 14 kDa subunit                                  |      |      |      |      |      |      |      |      |      |      |      | 0.01 |
| Q9CQ92 | Mitochondrial fission 1 protein                                       |      |      | 0.02 |      |      |      | 0.02 |      |      |      | 0.02 |      |
| Q9CQA1 | Trafficking protein particle complex subunit 5                        |      |      |      | 0.02 |      | 0.01 |      |      |      |      |      | 0.02 |
| Q9CQB5 | CDGSH iron-sulfur domain-containing protein 2                         |      |      |      | 0.02 |      |      |      |      |      |      |      | 0.01 |
| Q9CQC8 | Maspardin                                                             |      |      | 0.01 |      |      |      |      |      |      |      |      |      |
| Q9CQD1 | Ras-related protein Rab-5A                                            | 0.15 | 0.14 | 0.09 | 0.17 | 0.17 | 0.10 | 0.08 | 0.07 | 0.13 | 0.15 | 0.11 | 0.09 |
| Q9CQE3 | 28S ribosomal protein S17, mitochondrial                              |      |      |      |      |      |      |      |      |      |      |      | 0.01 |
| Q9CQF0 | 39S ribosomal protein L11, mitochondrial                              |      |      | 0.01 | 0.03 | 0.02 | 0.03 | 0.02 | 0.01 |      |      | 0.03 | 0.01 |
| Q9CQH8 | Ribonuclease P protein subunit p14                                    |      |      |      |      |      |      |      |      |      |      |      | 0.01 |
| Q9CQI6 | Coactosin-like protein                                                |      |      |      |      |      | 0.01 |      |      |      |      |      | 0.02 |
| Q9CQI7 | U2 small nuclear ribonucleoprotein B''                                |      |      |      |      |      | 0.01 |      |      |      |      |      |      |
| Q9CQJ8 | NADH dehydrogenase [ubiquinone] 1 beta subcomplex subunit 9           |      |      |      |      |      |      |      | 0.01 |      |      |      |      |
| Q9CQK2 | 40S ribosomal protein S24                                             | 0.13 | 0.08 | 0.09 | 0.14 | 0.15 | 0.08 | 0.09 | 0.06 |      | 0.09 | 0.10 | 0.21 |
| Q9CQL4 | 39S ribosomal protein L20, mitochondrial                              |      |      |      |      |      |      |      |      |      |      |      | 0.01 |
| Q9CQL5 | 39S ribosomal protein L18, mitochondrial                              |      |      |      | 0.01 | 0.02 |      |      | 0.01 |      |      |      | 0.03 |
| Q9CQM9 | Glutaredoxin-3                                                        |      |      |      |      |      |      | 0.01 |      |      |      |      |      |
| Q9CQN7 | 39S ribosomal protein L41, mitochondrial                              |      |      |      |      |      |      |      | 0.01 |      |      |      | 0.08 |
| Q9CQT1 | Methylthioribose-1-phosphate isomerase                                |      |      | 0.03 | 0.02 |      | 0.04 | 0.02 |      | 0.04 |      | 0.03 |      |
| Q9CQV8 | 14-3-3 protein beta/alpha                                             | 0.07 | 0.07 | 0.09 | 0.08 | 0.12 | 0.06 | 0.13 | 0.13 | 0.11 | 0.06 | 0.13 | 0.15 |
| Q9CQW0 | ER membrane protein complex subunit 6                                 |      |      |      |      |      |      |      | 0.02 |      |      |      | 0.02 |
| Q9CQW2 | ADP-ribosylation factor-like protein 8B                               | 0.06 | 0.03 | 0.08 | 0.06 | 0.07 | 0.04 | 0.07 | 0.07 |      |      | 0.08 | 0.06 |
| Q9CQW9 | Interferon-induced transmembrane protein 3                            |      |      |      | 0.02 |      |      |      | 0.02 |      |      |      | 0.03 |
| Q9CQZ5 | NADH dehydrogenase [ubiquinone] 1 alpha subcomplex subunit 6          |      |      |      |      |      |      |      |      |      |      |      | 0.01 |
| Q9CQZ6 | NADH dehydrogenase [ubiquinone] 1 beta subcomplex subunit 3           |      |      |      |      |      |      |      |      |      |      |      | 0.01 |
| Q9CR59 | Growth arrest and DNA damage-inducible proteins-interacting protein 1 |      |      |      | 0.01 |      |      | 0.01 |      |      |      |      |      |
| Q9CR61 | NADH dehydrogenase [ubiquinone] 1 beta subcomplex subunit 7           |      |      | 0.02 |      |      |      | 0.02 | 0.01 |      |      | 0.02 | 0.02 |
| Q9CR67 | Transmembrane protein 33                                              | 0.05 | 0.04 | 0.04 | 0.07 | 0.06 | 0.04 | 0.02 | 0.03 | 0.04 |      | 0.03 | 0.09 |
| Q9CR68 | Cytochrome b-c1 complex subunit Rieske, mitochondrial                 |      | 0.04 | 0.03 | 0.08 | 0.04 | 0.04 | 0.01 | 0.02 | 0.03 |      | 0.03 | 0.03 |
| Q9CR88 | 28S ribosomal protein S14, mitochondrial                              |      |      |      |      |      |      |      |      |      |      |      | 0.01 |
| Q9CRA5 | Golgi phosphoprotein 3                                                |      |      |      |      |      |      |      |      |      |      |      | 0.01 |
| Q9CRA8 | Exosome complex component RRP46                                       |      |      |      |      |      |      |      | 0.02 |      |      |      |      |
| Q9CRB2 | H/ACA ribonucleoprotein complex subunit 2                             |      |      |      |      |      |      |      |      |      |      |      | 0.01 |
| Q9CRB9 | MICOS complex subunit Mic19                                           |      | 0.05 | 0.03 | 0.04 | 0.06 | 0.05 | 0.02 | 0.01 | 0.03 | 0.06 | 0.04 | 0.03 |
| Q9CRT8 | Exportin-T                                                            | 0.03 | 0.06 | 0.06 | 0.05 | 0.04 | 0.05 | 0.02 |      | 0.09 | 0.06 | 0.05 | 0.03 |
| Q9CS42 | Ribose-phosphate pyrophosphokinase 2                                  | 0.04 |      | 0.06 | 0.09 | 0.13 | 0.05 | 0.04 | 0.04 | 0.13 | 0.05 | 0.08 | 0.06 |
| Q9CSH3 | Exosome complex exonuclease RRP44                                     |      | 0.05 |      |      |      | 0.01 |      |      |      | 0.06 |      |      |
| Q9CSU0 | Regulation of nuclear pre-mRNA domain-containing protein 1B           | 0.06 | 0.09 | 0.02 | 0.02 | 0.03 | 0.04 |      |      |      |      |      |      |

|        |                                                                 |      |      |      |      |      |      |      |      |      |      |      |      |
|--------|-----------------------------------------------------------------|------|------|------|------|------|------|------|------|------|------|------|------|
| Q9CT10 | Ran-binding protein 3                                           | 0.05 | 0.08 | 0.01 | 0.03 | 0.02 | 0.03 |      | 0.01 |      | 0.06 |      | 0.01 |
| Q9CU62 | Structural maintenance of chromosomes protein 1A                | 0.10 | 0.08 | 0.03 | 0.03 | 0.03 | 0.02 |      |      | 0.02 | 0.09 |      | 0.01 |
| Q9CVB6 | Actin-related protein 2/3 complex subunit 2                     |      |      | 0.02 | 0.01 | 0.05 | 0.01 | 0.05 | 0.07 | 0.04 |      | 0.07 | 0.06 |
| Q9CVF5 | Putative uncharacterized protein                                |      |      |      |      |      |      |      |      |      |      |      | 0.01 |
| Q9CWJ9 | Bifunctional purine biosynthesis protein PURH                   |      |      |      |      | 0.13 |      | 0.04 | 0.06 | 0.07 |      | 0.05 | 0.11 |
| Q9CWX0 | Putative uncharacterized protein                                | 0.20 | 0.15 | 0.21 | 0.25 | 0.27 | 0.13 | 0.15 | 0.14 | 0.22 | 0.15 | 0.22 | 0.34 |
| Q9CWU6 | Ubiquinol-cytochrome-c reductase complex assembly factor 1      |      |      |      | 0.01 |      |      |      | 0.02 |      |      |      | 0.02 |
| Q9CX00 | IST1 homolog                                                    |      |      |      | 0.01 |      |      |      |      |      |      |      |      |
| Q9CX30 | Protein YIF1B                                                   |      |      |      |      |      | 0.01 |      |      |      |      |      | 0.01 |
| Q9CX34 | Protein SGT1 homolog                                            | 0.09 | 0.10 |      |      |      | 0.02 |      |      |      |      |      | 0.01 |
| Q9CX56 | 26S proteasome non-ATPase regulatory subunit 8                  |      |      | 0.04 | 0.06 | 0.05 | 0.02 | 0.03 | 0.03 | 0.06 |      | 0.06 | 0.04 |
| Q9CX86 | Heterogeneous nuclear ribonucleoprotein A0                      |      | 0.07 | 0.03 | 0.06 |      | 0.09 |      |      | 0.04 |      | 0.03 | 0.04 |
| Q9CXJ4 | ATP-binding cassette sub-family B member 8, mitochondrial       |      |      | 0.09 | 0.02 | 0.03 | 0.02 | 0.06 |      | 0.05 |      | 0.08 |      |
| Q9CXX8 | 60S ribosome subunit biogenesis protein NIP7 homolog            |      |      |      |      |      |      |      | 0.01 |      |      |      | 0.02 |
| Q9CXR1 | Dehydrogenase/reductase SDR family member 7                     |      |      |      |      |      |      |      |      | 0.01 |      |      |      |
| Q9CXS4 | Centromere protein V                                            |      | 0.03 | 0.02 | 0.02 |      | 0.02 |      |      | 0.02 |      |      | 0.01 |
| Q9CXT8 | Mitochondrial-processing peptidase subunit beta                 |      |      | 0.02 |      |      |      |      | 0.01 |      |      |      | 0.02 |
| Q9CXW2 | 28S ribosomal protein S22, mitochondrial                        | 0.06 | 0.05 | 0.03 | 0.02 |      | 0.02 | 0.02 |      |      |      | 0.02 | 0.01 |
| Q9CY16 | 28S ribosomal protein S28, mitochondrial                        |      |      | 0.01 | 0.03 | 0.03 |      |      |      |      |      |      | 0.01 |
| Q9CY49 | Putative uncharacterized protein                                |      |      | 0.02 |      |      |      |      |      |      |      |      |      |
| Q9CY57 | Chromatin target of PRMT1 protein                               |      | 0.08 | 0.04 | 0.02 |      | 0.03 | 0.01 | 0.01 | 0.02 |      | 0.04 |      |
| Q9CY58 | Plasminogen activator inhibitor 1 RNA-binding protein           |      |      | 0.02 | 0.03 |      | 0.01 |      |      |      |      |      |      |
| Q9CY64 | Biliverdin reductase A                                          | 0.08 | 0.04 | 0.08 | 0.06 | 0.20 | 0.03 | 0.06 | 0.08 | 0.10 |      | 0.08 | 0.12 |
| Q9CYI4 | Putative RNA-binding protein Luc7-like 1                        | 0.06 | 0.05 | 0.04 | 0.03 | 0.03 | 0.03 | 0.02 | 0.01 | 0.02 | 0.05 | 0.05 | 0.02 |
| Q9CYN2 | Signal peptidase complex subunit 2                              | 0.06 | 0.04 | 0.06 | 0.07 | 0.07 | 0.03 | 0.06 | 0.08 |      |      | 0.04 | 0.08 |
| Q9CYN9 | Renin receptor                                                  |      |      |      | 0.02 |      | 0.01 |      | 0.02 |      |      | 0.02 | 0.01 |
| Q9CYT3 | Putative uncharacterized protein                                | 0.16 | 0.18 | 0.13 | 0.25 | 0.15 | 0.14 | 0.06 | 0.08 | 0.15 | 0.17 | 0.13 | 0.10 |
| Q9CZ04 | COP9 signalosome complex subunit 7a                             | 0.03 | 0.05 | 0.01 | 0.02 | 0.02 | 0.01 | 0.02 |      | 0.03 |      | 0.03 |      |
| Q9CZ28 | Vacuolar-sorting protein SNF8                                   |      |      |      | 0.02 |      | 0.01 |      |      |      |      |      |      |
| Q9CZB4 | Putative uncharacterized protein                                | 0.05 | 0.05 | 0.06 | 0.06 | 0.04 | 0.03 | 0.03 | 0.04 | 0.04 |      | 0.06 | 0.04 |
| Q9CZD3 | Glycine--tRNA ligase                                            | 0.10 | 0.08 | 0.16 | 0.12 | 0.18 | 0.12 | 0.14 | 0.09 | 0.17 | 0.16 | 0.17 | 0.12 |
| Q9CZH3 | Proteasome assembly chaperone 3                                 |      |      |      |      |      |      |      |      |      |      |      | 0.02 |
| Q9CZI5 | Putative uncharacterized protein                                |      | 0.02 | 0.08 | 0.09 | 0.10 | 0.04 | 0.05 | 0.03 |      | 0.05 | 0.07 | 0.10 |
| Q9CZR8 | Elongation factor Ts, mitochondrial                             | 0.04 | 0.05 | 0.03 | 0.05 | 0.05 | 0.03 |      | 0.02 | 0.03 |      | 0.02 | 0.02 |
| Q9CZU3 | Superkiller viralicidic activity 2-like 2                       | 0.04 |      | 0.02 | 0.02 | 0.05 | 0.02 |      |      | 0.05 | 0.14 |      | 0.01 |
| Q9CZU5 | Putative uncharacterized protein                                |      |      | 0.15 | 0.05 | 0.03 | 0.04 | 0.02 | 0.02 | 0.08 |      | 0.06 | 0.05 |
| Q9CZU6 | Citrate synthase, mitochondrial                                 |      |      |      |      |      |      |      | 0.03 |      |      |      | 0.02 |
| Q9CZX9 | ER membrane protein complex subunit 4                           |      |      |      | 0.01 |      |      |      | 0.02 |      |      |      | 0.03 |
| Q9D024 | Coiled-coil domain-containing protein 47                        |      | 0.04 | 0.03 | 0.04 |      | 0.01 |      | 0.01 |      |      | 0.02 | 0.01 |
| Q9D051 | Pyruvate dehydrogenase E1 component subunit beta, mitochondrial |      | 0.12 | 0.04 | 0.06 | 0.11 | 0.04 | 0.03 | 0.06 | 0.06 |      | 0.04 | 0.11 |
| Q9D071 | MMS19 nucleotide excision repair protein homolog                |      |      |      |      | 0.02 |      |      |      | 0.03 |      |      |      |
| Q9D0D5 | General transcription factor IIE subunit 1                      |      | 0.03 |      |      |      | 0.01 |      |      |      |      |      |      |
| Q9D0E1 | Heterogeneous nuclear ribonucleoprotein M                       | 0.52 | 0.45 | 0.25 | 0.31 | 0.18 | 0.27 | 0.07 | 0.11 | 0.24 | 0.66 | 0.13 | 0.15 |
| Q9D0G0 | 28S ribosomal protein S30, mitochondrial                        |      | 0.03 |      |      |      | 0.01 |      |      |      |      |      |      |
| Q9D0I9 | Arginine--tRNA ligase, cytoplasmic                              | 0.26 | 0.21 | 0.21 | 0.19 | 0.13 | 0.14 | 0.09 | 0.05 | 0.18 | 0.20 | 0.18 | 0.20 |
| Q9D0J4 | ADP-ribosylation factor-like protein 2                          |      |      |      | 0.02 | 0.02 |      |      |      |      |      |      | 0.03 |
| Q9D0K2 | Succinyl-CoA:3-ketoacid coenzyme A transferase 1, mitochondrial |      | 0.07 | 0.05 | 0.11 | 0.12 | 0.02 | 0.03 | 0.06 | 0.11 |      | 0.07 | 0.11 |
| Q9D0M3 | Cytochrome c1, heme protein, mitochondrial                      | 0.11 | 0.08 | 0.09 | 0.11 | 0.05 | 0.06 | 0.04 | 0.06 | 0.05 | 0.06 | 0.09 | 0.06 |







|        |                                                                         |      |      |      |      |      |      |      |      |      |      |      |      |
|--------|-------------------------------------------------------------------------|------|------|------|------|------|------|------|------|------|------|------|------|
| Q9EQ06 | Estradiol 17-beta-dehydrogenase 11                                      |      |      | 0.02 | 0.02 | 0.02 |      |      |      | 0.02 |      | 0.02 | 0.01 |
| Q9EQH2 | Endoplasmic reticulum aminopeptidase 1                                  | 0.03 |      | 0.02 | 0.09 | 0.04 | 0.05 | 0.04 | 0.10 | 0.03 |      |      | 0.04 |
| Q9EQI8 | 39S ribosomal protein L46, mitochondrial                                |      |      | 0.02 | 0.01 | 0.02 | 0.02 | 0.02 | 0.01 | 0.02 |      | 0.02 |      |
| Q9ER41 | Torsin-1B                                                               |      |      |      | 0.03 |      |      |      |      |      |      |      |      |
| Q9ERI6 | Retinol dehydrogenase 14                                                |      |      | 0.03 | 0.03 | 0.03 | 0.01 | 0.02 | 0.01 |      |      | 0.02 |      |
| Q9ERK4 | Exportin-2                                                              | 0.25 | 0.20 | 0.08 | 0.10 | 0.09 | 0.10 | 0.02 | 0.04 | 0.15 | 0.31 | 0.05 | 0.08 |
| Q9ERR7 | 15 kDa selenoprotein                                                    |      |      |      |      |      |      |      |      | 0.01 |      |      | 0.02 |
| Q9ERS2 | NADH dehydrogenase [ubiquinone] 1 alpha subcomplex subunit 13           |      |      | 0.05 | 0.07 |      | 0.04 | 0.03 | 0.04 |      |      | 0.05 | 0.07 |
| Q9ERU9 | E3 SUMO-protein ligase RanBP2                                           | 0.12 | 0.14 | 0.04 | 0.05 | 0.02 | 0.01 |      | 0.01 | 0.04 | 0.09 | 0.02 | 0.02 |
| Q9ES28 | Rho guanine nucleotide exchange factor 7                                |      |      | 0.02 |      |      |      |      |      |      |      |      |      |
| Q9ES52 | Phosphatidylinositol 3,4,5-trisphosphate 5-phosphatase 1                |      | 0.06 | 0.02 |      |      |      | 0.01 |      | 0.04 |      | 0.02 | 0.02 |
| Q9ES94 | Cathepsin Z                                                             | 0.05 | 0.06 | 0.03 | 0.03 | 0.03 | 0.02 | 0.03 | 0.01 | 0.03 | 0.05 | 0.02 | 0.01 |
| Q9ES97 | Reticulon-3                                                             |      |      | 0.02 | 0.04 | 0.03 | 0.02 | 0.02 | 0.01 | 0.03 |      | 0.05 | 0.01 |
| Q9ESJ0 | Exportin-4                                                              |      | 0.03 |      |      |      |      |      |      |      |      |      |      |
| Q9ESP1 | Stromal cell-derived factor 2-like protein 1                            |      |      | 0.02 | 0.02 | 0.02 | 0.01 | 0.02 | 0.02 |      |      | 0.02 | 0.02 |
| Q9EST5 | Acidic leucine-rich nuclear phosphoprotein 32 family member B           |      |      | 0.02 |      | 0.04 | 0.01 | 0.02 |      | 0.05 |      | 0.02 | 0.02 |
| Q9ESW4 | Acylglycerol kinase, mitochondrial                                      |      |      | 0.02 |      |      |      |      |      |      |      |      |      |
| Q9JHI5 | Isovaleryl-CoA dehydrogenase, mitochondrial                             |      |      |      |      |      | 0.02 | 0.01 | 0.02 | 0.01 | 0.01 | 0.02 | 0.01 |
| Q9JHI7 | Exosome complex component RRP45                                         |      |      |      |      |      |      |      |      |      |      |      |      |
| Q9JHS4 | ATP-dependent Clp protease ATP-binding subunit clpX-like, mitochondrial |      |      | 0.03 | 0.02 |      | 0.02 |      |      | 0.02 |      | 0.02 |      |
| Q9JHU4 | Cytoplasmic dynein 1 heavy chain 1                                      | 0.40 | 0.40 | 0.32 | 0.24 | 0.19 | 0.14 | 0.10 | 0.04 | 0.47 | 0.35 | 0.23 | 0.34 |
| Q9JI10 | Serine/threonine-protein kinase 3                                       |      | 0.05 |      | 0.02 |      | 0.01 |      |      |      |      |      | 0.01 |
| Q9JI11 | Serine/threonine-protein kinase 4                                       |      | 0.04 |      | 0.02 |      | 0.01 |      |      |      |      |      | 0.01 |
| Q9JIF0 | Protein arginine N-methyltransferase 1                                  |      |      |      |      |      |      | 0.01 | 0.03 |      |      | 0.02 | 0.04 |
| Q9JIF7 | Coatomer subunit beta                                                   | 0.20 | 0.12 | 0.06 | 0.05 | 0.02 | 0.07 | 0.01 | 0.02 | 0.04 | 0.24 | 0.03 | 0.06 |
| Q9JIG8 | PRA1 family protein 2                                                   |      |      | 0.02 | 0.03 | 0.02 |      |      | 0.01 |      |      | 0.02 | 0.02 |
| Q9JIK9 | 28S ribosomal protein S34, mitochondrial                                |      | 0.04 | 0.02 | 0.05 | 0.05 | 0.02 | 0.02 |      | 0.02 |      | 0.02 | 0.01 |
| Q9JJ28 | Protein flightless-1 homolog                                            |      |      | 0.06 | 0.05 |      | 0.02 | 0.03 | 0.01 | 0.03 | 0.06 | 0.05 | 0.03 |
| Q9JJ80 | Ribosome production factor 2 homolog                                    |      | 0.05 | 0.01 | 0.05 | 0.04 | 0.03 |      | 0.03 | 0.05 | 0.04 | 0.03 | 0.02 |
| Q9JKB1 | Ubiquitin carboxyl-terminal hydrolase isozyme L3                        |      |      |      |      |      |      |      |      |      |      |      | 0.02 |
| Q9JKR6 | Hypoxia up-regulated protein 1                                          | 0.52 | 0.41 | 0.47 | 0.46 | 0.28 | 0.20 | 0.18 | 0.23 | 0.33 | 0.76 | 0.36 | 0.21 |
| Q9JKX6 | ADP-sugar pyrophosphatase                                               |      | 0.03 | 0.02 | 0.01 | 0.03 | 0.02 |      | 0.01 | 0.03 |      | 0.02 | 0.01 |
| Q9JKY0 | Cell differentiation protein RCD1 homolog                               |      |      |      |      |      |      |      |      |      |      |      | 0.01 |
| Q9JKZ2 | Sodium/myo-inositol cotransporter                                       |      | 0.03 |      | 0.01 | 0.02 | 0.01 |      | 0.02 | 0.02 | 0.05 | 0.02 | 0.02 |
| Q9JL26 | Formin-like protein 1                                                   | 0.06 | 0.08 | 0.08 | 0.06 | 0.04 | 0.03 | 0.03 | 0.02 | 0.08 | 0.10 | 0.07 | 0.05 |
| Q9JLI8 | Squamous cell carcinoma antigen recognized by T-cells 3                 |      |      |      |      |      |      |      |      |      |      |      | 0.01 |
| Q9JLJ5 | Elongation of very long chain fatty acids protein 1                     |      |      |      | 0.02 |      | 0.01 |      |      |      |      |      | 0.01 |
| Q9JM62 | Receptor expression-enhancing protein 6                                 |      |      |      |      |      |      |      |      |      |      |      | 0.01 |
| Q9JM76 | Actin-related protein 2/3 complex subunit 3                             |      |      | 0.02 | 0.03 | 0.07 | 0.01 | 0.03 | 0.04 |      |      | 0.04 | 0.11 |
| Q9JMA1 | Ubiquitin carboxyl-terminal hydrolase 14                                | 0.15 | 0.18 | 0.11 | 0.09 | 0.08 | 0.09 | 0.08 | 0.04 | 0.13 | 0.21 | 0.14 | 0.06 |
| Q9QUJ7 | Long-chain-fatty-acid--CoA ligase 4                                     |      |      | 0.03 |      |      |      |      |      |      |      | 0.02 |      |
| Q9QUM9 | Proteasome subunit alpha type-6                                         |      |      |      |      | 0.04 | 0.02 | 0.02 |      |      |      |      | 0.01 |
| Q9QXB9 | Developmentally-regulated GTP-binding protein 2                         | 0.06 | 0.07 |      | 0.01 |      | 0.03 |      |      | 0.01 |      |      | 0.01 |
| Q9QXK3 | Coatomer subunit gamma-2                                                | 0.04 | 0.04 | 0.01 | 0.01 | 0.02 |      |      |      | 0.03 | 0.05 |      | 0.01 |
| Q9QXS1 | Plectin                                                                 | 0.22 | 0.34 | 0.69 | 0.74 | 0.07 | 0.02 | 0.35 | 0.43 | 0.15 | 0.07 | 0.57 | 1.13 |
| Q9QXX4 | Calcium-binding mitochondrial carrier protein Aralar2                   | 0.11 | 0.08 | 0.15 | 0.36 | 0.13 | 0.04 | 0.09 | 0.23 | 0.13 |      | 0.16 | 0.17 |
| Q9QY81 | Nuclear pore membrane glycoprotein 210                                  | 0.04 | 0.04 | 0.02 | 0.04 |      | 0.01 |      |      |      |      |      | 0.01 |



|        |                                                               |      |      |      |      |      |      |      |      |      |      |      |      |
|--------|---------------------------------------------------------------|------|------|------|------|------|------|------|------|------|------|------|------|
| Q9Z1T1 | AP-3 complex subunit beta-1                                   |      |      | 0.01 |      |      |      |      |      | 0.01 |      |      |      |
| Q9Z1Z0 | General vesicular transport factor p115                       | 0.08 | 0.07 | 0.05 | 0.03 | 0.02 | 0.02 | 0.02 | 0.01 | 0.05 | 0.07 | 0.03 | 0.03 |
| Q9Z210 | Peroxisomal membrane protein 11B                              |      |      | 0.03 | 0.04 |      | 0.02 | 0.02 | 0.01 | 0.02 |      | 0.03 | 0.03 |
| Q9Z277 | Tyrosine-protein kinase BAZ1B                                 |      | 0.03 |      |      |      |      |      |      |      | 0.08 |      |      |
| Q9Z2D8 | Methyl-CpG-binding domain protein 3                           |      |      |      |      |      |      |      |      |      |      |      | 0.01 |
| Q9Z2I0 | LETM1 and EF-hand domain-containing protein 1, mitochondrial  |      |      | 0.03 | 0.02 | 0.02 | 0.02 | 0.03 | 0.01 | 0.01 |      | 0.04 |      |
| Q9Z2I8 | Succinyl-CoA ligase [GDP-forming] subunit beta, mitochondrial | 0.26 | 0.19 | 0.15 | 0.11 | 0.11 | 0.07 | 0.04 | 0.03 | 0.15 | 0.18 | 0.10 | 0.03 |
| Q9Z2X1 | Heterogeneous nuclear ribonucleoprotein F                     | 0.29 | 0.24 | 0.14 | 0.16 | 0.17 | 0.13 | 0.06 | 0.06 | 0.17 | 0.22 | 0.10 | 0.13 |
| S4R1S4 | Receptor-type tyrosine-protein phosphatase C                  |      |      | 0.08 | 0.03 | 0.05 |      | 0.06 | 0.05 | 0.05 |      | 0.09 | 0.06 |
| V9GX06 | Protein Gm11214                                               | 0.21 | 0.22 | 0.14 | 0.26 | 0.23 | 0.15 | 0.11 | 0.18 | 0.21 | 0.26 | 0.17 | 0.25 |
| Z4YJY0 | BRISC complex subunit Abro1                                   |      |      | 0.02 |      |      | 0.01 |      |      |      |      | 0.02 | 0.01 |
