# Supplementary material for: Lipopolysaccharide and statin-mediated immune-responsive protein networks revealed in macrophages through affinity purification spacer-arm controlled cross-linking (AP-SPACC) proteomics
Source: Royal Society of Chemistry journal article supplement (doi:10.1039/d2mo00224h), 2022-10-18
Supplement: d2mo00224h4.pdf [file d2mo00224h4.pdf]

Table S3 Identified immune responsive proteins using STRING database with differential expression changes in statin-treated and Bio-LPS-stimulated RAW 264.7 macrophages.

| Accession  | Description                                                                                           | Gene name | Control | Bio-LPS | Bio-LPS-statin | Statin | DUCCT | Bio-LPS-DUCCT | Bio-LPS-Statin-DUCCT | Statin-DUCCT | BS3  | Bio-LPS-BS3 | Bio-LPS-Statin-BS3 | Statin-BS3 |
|------------|-------------------------------------------------------------------------------------------------------|-----------|---------|---------|----------------|--------|-------|---------------|----------------------|--------------|------|-------------|--------------------|------------|
| Q8BP40     | Lysophosphatidic acid phosphatase type 6                                                              | Acp6      |         |         | 0.03           |        |       |               | 0.01                 |              |      |             | 0.02               |            |
| Q3UZG4     | Aminoacyl tRNA synthase complex-interacting multifunctional protein 1                                 | Aimp1     | 0.07    | 0.09    | 0.02           | 0.03   |       | 0.03          |                      |              | 0.03 | 0.06        | 0.02               | 0.03       |
| B7STB7     | Annexin                                                                                               | Anxa1     |         | 0.06    | 0.14           | 0.07   | 0.09  | 0.03          | 0.11                 | 0.05         | 0.15 |             | 0.16               | 0.11       |
| Q9Z1T1     | AP-3 complex subunit beta-1                                                                           | Ap3b1     |         |         | 0.01           |        |       |               |                      |              | 0.01 |             |                    |            |
| O54774     | AP-3 complex subunit delta-1                                                                          | Ap3d1     |         |         |                |        |       |               |                      |              | 0.01 |             |                    |            |
| Q60875     | Rho guanine nucleotide exchange factor 2                                                              | Arhgef2   | 0.05    | 0.05    | 0.03           | 0.03   | 0.03  | 0.02          | 0.02                 | 0.01         | 0.03 | 0.06        | 0.02               | 0.03       |
| Q9ES28     | Rho guanine nucleotide exchange factor 7                                                              | Arhgef7   |         |         | 0.02           |        |       |               |                      |              |      |             |                    |            |
| A0A0A0MQN4 | Ubiquitin-like modifier-activating enzyme ATG7                                                        | Atg7      |         |         | 0.06           | 0.04   | 0.02  | 0.02          | 0.03                 |              | 0.04 |             | 0.04               | 0.02       |
| P01887     | Beta-2-microglobulin                                                                                  | B2m       |         |         |                |        |       |               |                      | 0.01         |      |             |                    | 0.01       |
| Q9Z1R2     | Large proline-rich protein BAG6                                                                       | Bag6      |         |         |                |        |       |               |                      |              |      | 0.09        |                    |            |
| O08734     | Bcl-2 homologous antagonist/killer                                                                    | Bak1      |         |         | 0.02           | 0.02   | 0.03  | 0.01          | 0.01                 | 0.01         | 0.02 |             | 0.03               |            |
| Q544Z6     | Bcl2-associated X protein, isoform CRA_b                                                              | Bax       | 0.25    | 0.13    | 0.16           | 0.17   | 0.21  | 0.14          | 0.13                 | 0.11         |      | 0.15        | 0.18               | 0.07       |
| Q8R2Q8     | Bone marrow stromal antigen 2                                                                         | Bst2      |         |         |                | 0.02   | 0.07  | 0.04          |                      | 0.06         | 0.01 |             |                    | 0.01       |
| P30993     | C5a anaphylatoxin chemotactic receptor 1                                                              | C5ar1     |         |         | 0.02           | 0.02   |       |               |                      | 0.01         |      |             |                    | 0.01       |
| P14211     | Calreticulin                                                                                          | Calr      |         |         |                |        |       |               | 0.02                 | 0.02         | 0.01 |             | 0.02               | 0.01       |
| Q3U6A3     | Monocyte differentiation antigen CD14                                                                 | Cd14      | 0.07    | 0.06    | 0.13           | 0.07   | 0.08  | 0.03          | 0.07                 | 0.06         | 0.04 | 0.12        | 0.11               |            |
| Q3U0U7     | Putative uncharacterized protein                                                                      | Cd180     |         |         | 0.01           |        |       |               | 0.02                 |              |      |             |                    |            |
| E5Q371     | Integrin-associated protein                                                                           | Cd47      |         |         | 0.01           |        |       |               |                      |              |      |             |                    |            |
| Q545Y5     | CD74 antigen (Invariant polypeptide of major histocompatibility complex, class II antigen-associated) | Cd74      |         |         | 0.03           | 0.03   |       | 0.01          | 0.02                 | 0.01         |      |             | 0.03               |            |
| P60766     | Cell division control protein 42 homolog                                                              | Cdc42     | 0.05    | 0.03    | 0.08           | 0.09   | 0.18  | 0.07          | 0.08                 | 0.07         |      | 0.05        | 0.08               | 0.08       |
| Q3U4J9     | Putative uncharacterized protein                                                                      | Cdk6      |         | 0.02    | 0.03           |        |       | 0.02          |                      | 0.01         |      |             | 0.02               | 0.02       |
| Q3U1N0     | Coronin                                                                                               | Coro1a    |         | 0.03    | 0.04           | 0.03   | 0.07  |               | 0.06                 | 0.16         | 0.03 |             | 0.07               | 0.31       |
| Q0P635     | Colony stimulating factor 1 receptor                                                                  | Csf1r     |         |         |                |        |       |               |                      |              | 0.02 |             |                    |            |
| P41241     | Tyrosine-protein kinase CSK                                                                           | Csk       |         | 0.04    |                | 0.02   |       |               |                      |              |      |             |                    |            |
| B3VQI8     | Cytochrome b-245 light chain                                                                          | Cyba      |         |         | 0.02           | 0.03   | 0.03  | 0.02          |                      | 0.02         |      |             | 0.02               | 0.02       |
| Q3U4P0     | Putative uncharacterized protein                                                                      | Cybb      | 0.05    | 0.04    | 0.14           | 0.11   | 0.12  | 0.05          | 0.10                 | 0.10         | 0.13 |             | 0.15               | 0.06       |
| O54734     | Dolichyl-diphosphooligosaccharide--protein glycosyltransferase 48 kDa subunit                         | Ddost     | 0.14    | 0.10    | 0.18           | 0.16   | 0.16  | 0.08          | 0.13                 | 0.12         | 0.14 | 0.10        | 0.21               | 0.09       |
| Q3TQX5     | ATP-dependent RNA helicase DDX3X                                                                      | Ddx3x     | 0.26    | 0.23    | 0.17           | 0.15   | 0.10  | 0.14          | 0.03                 | 0.04         | 0.14 | 0.33        | 0.09               | 0.13       |
| Q99M87     | Dnal homolog subfamily A member 3, mitochondrial                                                      | Dnaja3    | 0.04    | 0.04    | 0.02           | 0.03   |       | 0.02          |                      |              | 0.02 |             |                    |            |
| Q8C3J5     | Dedicator of cytokinesis protein 2                                                                    | Dock2     |         | 0.12    | 0.08           | 0.05   | 0.03  | 0.03          | 0.01                 |              | 0.08 | 0.11        | 0.03               | 0.06       |
| P70245     | 3-beta-hydroxysteroid-Delta(8),Delta(7)-isomerase                                                     | Ebp       |         |         |                |        |       |               |                      |              |      |             |                    | 0.01       |
| P58252     | Elongation factor 2                                                                                   | Eef2      | 0.05    | 0.11    | 0.16           | 0.13   | 0.53  | 0.10          | 0.44                 | 0.39         | 0.46 | 0.17        | 0.36               | 0.41       |
| Q03145     | Ephrin type-A receptor 2                                                                              | Epha2     |         |         | 0.05           |        |       |               | 0.01                 |              |      |             | 0.02               |            |
| B9EIU1     | Glutamyl-prolyl-tRNA synthetase                                                                       | Eprs      | 0.24    | 0.33    | 0.24           | 0.19   | 0.19  | 0.17          | 0.13                 | 0.04         | 0.30 | 0.48        | 0.22               | 0.19       |
| Q9EQH2     | Endoplasmic reticulum aminopeptidase 1                                                                | Erap1     | 0.03    |         | 0.02           | 0.09   | 0.04  | 0.05          | 0.04                 | 0.10         | 0.03 |             |                    | 0.04       |
| Q9CRA8     | Exosome complex component RRP46                                                                       | Exosc5    |         |         |                |        |       |               |                      |              | 0.02 |             |                    |            |
| P14234     | Tyrosine-protein kinase Fgr                                                                           | Fgr       |         | 0.03    | 0.05           | 0.04   |       | 0.02          | 0.01                 | 0.02         |      |             | 0.04               | 0.03       |
| Q00612     | Glucose-6-phosphate 1-dehydrogenase X                                                                 | G6pdx     |         |         |                |        |       |               |                      | 0.02         |      |             |                    | 0.03       |
| Q7TQ39     | Gag protein                                                                                           | gag       |         |         | 0.06           |        |       |               |                      |              |      |             | 0.03               | 0.01       |
| Q61213     | Gag                                                                                                   | gag       |         |         | 0.06           |        |       |               |                      |              |      |             | 0.02               | 0.01       |
| Q80Y14     | Glutaredoxin-related protein 5, mitochondrial                                                         | Glrx5     |         |         |                |        |       |               |                      |              |      |             |                    | 0.01       |
| Q9CRA5     | Golgi phosphoprotein 3                                                                                | Golph3    |         |         |                |        |       |               |                      |              |      |             |                    | 0.01       |
| F6UND7     | Tyrosine-protein kinase                                                                               | Hck       | 0.04    |         | 0.05           | 0.01   |       | 0.02          |                      | 0.01         |      | 0.04        | 0.02               | 0.02       |
| P70696     | Histone H2B type 1-A                                                                                  | Hist1h2ba |         |         | 0.06           | 0.15   | 0.08  | 0.06          | 0.09                 | 0.13         | 0.03 |             | 0.11               | 0.15       |
| Q3TL71     | Putative uncharacterized protein                                                                      | Hnrnpk    | 0.07    | 0.08    | 0.07           | 0.07   | 0.11  | 0.04          | 0.09                 | 0.07         | 0.11 | 0.10        | 0.13               | 0.09       |
| Q3TVV6     | Putative uncharacterized protein                                                                      | Hnrnpu    | 0.64    | 0.49    | 0.40           | 0.34   | 0.31  | 0.32          | 0.14                 | 0.13         | 0.47 | 0.73        | 0.32               | 0.16       |



|            |                                                         |         |      |      |      |      |      |      |      |      |      |      |      |      |      |
|------------|---------------------------------------------------------|---------|------|------|------|------|------|------|------|------|------|------|------|------|------|
| Q3TGE4     | Protein kinase C delta type                             | Prkcd   |      |      |      | 0.02 |      |      |      |      |      | 0.02 |      | 0.02 | 0.01 |
| Q3UYK2     | Presenilin                                              | Psen1   |      |      |      |      | 0.02 | 0.03 | 0.02 | 0.02 | 0.03 | 0.02 |      | 0.03 | 0.03 |
| Q9R1P4     | Proteasome subunit alpha type-1                         | Psm1    |      |      |      |      |      | 0.03 | 0.02 |      | 0.01 | 0.03 |      | 0.02 | 0.01 |
| P97371     | Proteasome activator complex subunit 1                  | Psm1    |      |      |      |      |      |      |      |      |      |      |      | 0.02 |      |
| Q3UCJ0     | Tyrosine-protein phosphatase non-receptor type          | Ptpn6   | 0.42 | 0.37 | 0.28 | 0.36 | 0.18 | 0.22 | 0.10 | 0.11 | 0.27 | 0.36 | 0.17 | 0.25 |      |
| S4R1S4     | Receptor-type tyrosine-protein phosphatase C            | Ptpnc   |      |      | 0.08 | 0.03 | 0.05 |      |      | 0.06 | 0.05 | 0.05 |      | 0.09 | 0.06 |
| Q4FJL0     | RAB10, member RAS oncogene family                       | Rab10   | 0.13 | 0.04 | 0.08 | 0.08 | 0.17 | 0.07 | 0.09 | 0.08 | 0.15 | 0.08 | 0.10 | 0.13 |      |
| Q0PD23     | RAB32, member RAS oncogene family                       | Rab32   |      |      |      | 0.01 | 0.02 | 0.01 | 0.01 |      | 0.03 |      | 0.02 |      |      |
| Q6PHN9     | Ras-related protein Rab-35                              | Rab35   | 0.10 | 0.05 | 0.06 | 0.07 | 0.14 | 0.06 | 0.07 | 0.07 | 0.09 | 0.09 | 0.08 | 0.12 |      |
| Q0PD56     | Rab5B                                                   | Rab5b   |      |      | 0.06 | 0.06 | 0.14 | 0.06 | 0.07 | 0.05 | 0.10 | 0.06 | 0.09 | 0.05 |      |
| P35279     | Ras-related protein Rab-6A                              | Rab6a   | 0.13 | 0.07 | 0.07 | 0.10 | 0.16 | 0.07 | 0.09 | 0.06 | 0.11 | 0.07 | 0.09 | 0.09 |      |
| Q0PD49     | RAB8B, member RAS oncogene family                       | Rab8b   | 0.12 | 0.07 | 0.07 | 0.08 | 0.15 | 0.09 | 0.07 | 0.07 | 0.12 |      | 0.10 | 0.12 |      |
| Q4VAE6     | Ras family member A                                     | Rhoa    |      |      | 0.06 | 0.07 | 0.20 | 0.06 | 0.11 | 0.09 | 0.08 | 0.05 | 0.09 | 0.07 |      |
| E9Q5A0     | 60S ribosomal protein L13a                              | Rpl13a  | 0.14 | 0.10 | 0.08 | 0.13 | 0.11 | 0.05 | 0.07 | 0.06 | 0.08 | 0.09 | 0.09 | 0.21 |      |
| O70569     | Ribosomal protein S14                                   | rps14   |      | 0.09 | 0.15 | 0.13 | 0.09 | 0.10 | 0.10 | 0.08 |      | 0.13 | 0.12 | 0.16 |      |
| Q8BT90     | Putative uncharacterized protein                        | Rps17   | 0.07 |      | 0.13 | 0.12 | 0.10 | 0.07 | 0.09 | 0.09 |      |      | 0.11 | 0.09 |      |
| Q5M9P3     | Rps19 protein                                           | Rps19   |      |      | 0.06 | 0.11 |      | 0.08 | 0.10 | 0.07 |      |      | 0.13 | 0.08 |      |
| Q9CQK2     | 40S ribosomal protein S24                               | Rps24   | 0.13 | 0.08 | 0.09 | 0.14 | 0.15 | 0.08 | 0.09 | 0.06 |      | 0.09 | 0.10 | 0.21 |      |
| Q3UCL7     | Putative uncharacterized protein                        | Rps3    | 0.76 | 0.56 | 0.65 | 0.54 | 0.65 | 0.37 | 0.47 | 0.32 | 0.64 | 0.59 | 0.70 | 0.54 |      |
| Q3UK56     | Putative uncharacterized protein                        | Rps3    | 0.72 | 0.56 | 0.58 | 0.45 | 0.54 | 0.31 | 0.41 | 0.27 | 0.55 | 0.55 | 0.63 | 0.46 |      |
| Q5BLK1     | 40S ribosomal protein S6                                | Rps6    | 0.25 | 0.21 | 0.16 | 0.16 | 0.12 | 0.09 | 0.14 | 0.11 | 0.13 | 0.21 | 0.18 | 0.23 |      |
| P10833     | Ras-related protein R-Ras                               | Rras    |      |      |      |      |      | 0.02 | 0.01 |      | 0.02 |      |      | 0.01 |      |
| F8WJEO     | Deoxynucleoside triphosphate triphosphohydrolase SAMHD1 | Samhd1  |      | 0.03 |      |      |      | 0.01 |      |      | 0.01 |      |      | 0.01 |      |
| Q9JLI8     | Squamous cell carcinoma antigen recognized by T-cells 3 | Sart3   |      |      |      |      |      |      |      |      |      |      |      | 0.01 |      |
| P70122     | Ribosome maturation protein SBDS                        | Sbds    |      |      |      |      |      |      |      |      | 0.02 |      | 0.02 | 0.01 |      |
| Q99JR1     | Sideroflexin-1                                          | Sfxn1   | 0.07 | 0.08 | 0.04 | 0.05 | 0.04 | 0.04 | 0.02 | 0.03 | 0.03 | 0.05 | 0.02 | 0.06 |      |
| Q69ZN1     | MKIAA1252 protein                                       | Sgpl1   | 0.09 | 0.09 | 0.07 | 0.04 | 0.02 | 0.03 | 0.02 | 0.02 | 0.04 |      | 0.05 | 0.04 |      |
| Q3TKT4     | Transcription activator BRG1                            | Smarca4 |      | 0.06 |      | 0.03 |      | 0.01 |      |      | 0.03 | 0.08 |      |      |      |
| A0A087WSP5 | Signal transducer and activator of transcription        | Stat1   |      |      |      |      |      | 0.02 |      |      |      |      |      |      |      |
| Q9JI10     | Serine/threonine-protein kinase 3                       | Stk3    |      | 0.05 |      | 0.02 |      | 0.01 |      |      |      |      |      | 0.01 |      |
| Q9JI11     | Serine/threonine-protein kinase 4                       | Stk4    |      | 0.04 |      | 0.02 |      | 0.01 |      |      |      |      |      | 0.01 |      |
| Q99JB2     | Stomatin-like protein 2, mitochondrial                  | Stoml2  | 0.08 | 0.10 | 0.06 | 0.16 | 0.05 | 0.10 | 0.05 | 0.05 | 0.08 |      | 0.06 | 0.04 |      |
| Q6A028     | Switch-associated protein 70                            | Swap70  |      |      | 0.03 |      |      |      |      |      | 0.02 |      | 0.02 |      |      |
| Q7TMK9     | Heterogeneous nuclear ribonucleoprotein Q               | Syncrip |      |      | 0.02 | 0.02 | 0.04 | 0.02 | 0.01 | 0.01 | 0.02 |      | 0.02 | 0.01 |      |
| Q62351     | Transferrin receptor protein 1                          | Tfrc    | 0.29 | 0.27 | 0.21 | 0.23 | 0.15 | 0.14 | 0.19 | 0.17 | 0.13 | 0.33 | 0.23 | 0.15 |      |
| G3X8Y8     | Toll-like receptor                                      | Tlr2    |      | 0.03 | 0.01 | 0.01 | 0.02 |      |      |      | 0.02 |      | 0.05 | 0.02 |      |
| Q548J0     | Tlr7 protein                                            | Tlr7    |      |      | 0.02 |      | 0.02 |      |      |      |      |      |      | 0.02 |      |
| Q3TBT3     | Stimulator of interferon genes protein                  | Tmem173 |      |      |      | 0.02 |      |      |      |      |      |      |      |      |      |
| Q3TFA9     | Putative uncharacterized protein                        | Tmod3   |      |      |      |      | 0.03 |      | 0.01 |      | 0.05 |      |      |      |      |
| Q3UR33     | Putative uncharacterized protein                        | Tmpo    |      | 0.10 | 0.05 |      |      | 0.03 | 0.02 | 0.02 |      | 0.12 | 0.03 |      |      |
| Q61033     | Lamina-associated polypeptide 2, isoforms alpha/zeta    | Tmpo    |      | 0.06 |      |      |      |      |      |      |      |      | 0.10 |      |      |
| P06804     | Tumor necrosis factor                                   | Tnf     |      |      | 0.06 | 0.01 |      |      | 0.05 |      |      |      |      | 0.08 |      |
| Q01320     | DNA topoisomerase 2-alpha                               | Top2a   |      | 0.03 |      | 0.01 |      | 0.01 |      |      | 0.02 |      |      |      |      |
| F8WHQ1     | Tumor protein D52                                       | Tpd52   |      |      |      |      |      |      |      |      |      |      |      | 0.02 |      |
| Q3U3X7     | Putative uncharacterized protein                        | Trim25  |      |      | 0.01 |      |      |      |      |      |      |      |      |      |      |
| Q62318     | Transcription intermediary factor 1-beta                | Trim28  | 0.24 | 0.21 | 0.12 | 0.09 | 0.03 | 0.12 | 0.02 | 0.01 | 0.08 | 0.34 | 0.06 | 0.03 |      |
| Q3TJ75     | 60 kDa SS-A/Ro ribonucleoprotein                        | Trove2  |      |      | 0.02 |      |      |      |      |      |      |      |      |      |      |
| P61089     | Ubiquitin-conjugating enzyme E2 N                       | Ube2n   |      |      | 0.02 | 0.03 |      | 0.03 | 0.02 | 0.03 |      |      | 0.04 | 0.07 |      |
| E9PYK0     | Protein unc-93 homolog B1                               | Unc93b1 |      |      |      | 0.01 | 0.02 | 0.01 |      | 0.01 | 0.02 |      | 0.02 | 0.01 |      |
| B0QZN5     | Vesicle-associated membrane protein 2                   | Vamp2   |      |      |      |      |      |      |      | 0.02 |      |      |      | 0.01 |      |
| Q3TXC4     | Putative uncharacterized protein                        | Vav1    |      |      | 0.02 | 0.02 |      | 0.01 |      |      | 0.03 |      |      | 0.01 |      |
| Q3TFD9     | Putative uncharacterized protein                        | Vim     | 0.49 | 0.69 | 0.50 | 0.55 | 0.33 | 0.29 | 0.02 | 0.07 | 0.11 | 0.49 | 0.04 | 0.06 |      |
| Q3TWW0     | Putative uncharacterized protein                        | Vim     | 0.46 | 0.64 | 0.49 | 0.54 | 0.32 | 0.29 | 0.02 | 0.07 | 0.11 | 0.46 | 0.04 | 0.06 |      |
